# Supplementary material for: Social mixing in Fiji: Who-eats-with-whom contact patterns and the implications of age and ethnic heterogeneity for disease dynamics in the Pacific Islands
Source: PLoS One. 2017 Dec 6;12(12):e0186911. doi: 10.1371/journal.pone.0186911 (PMC5718486; doi:10.1371/journal.pone.0186911)
Supplement: S2 File — Sheet 1: line list of mealtime social contacts. Sheet 2: line list of animal contacts. Sheet 3: line list of travel in past week. Sheet 4: line list of moving community. (XLSX) [file pone.0186911.s002.xlsx]

## Sheet: socContact
p.age	p.agegrp	p.sex	p.eth	rural	it5c	it14c	it34c	it54c	it94c	non5c	non14c	non34c	non54c	non94c	lunch_away	meal_day
2	1-4	f	itaukei	urban	2	0	4	0	0	0	0	0	0	0	0	Fr
2	1-4	m	itaukei	urban	2	0	4	0	0	0	0	0	0	0	0	Th
2	1-4	m	itaukei	urban	0	0	0	0	0	0	0	0	0	0	0	We
2	1-4	m	itaukei	urban	0	0	0	0	2	0	0	0	0	0	0	We
2	1-4	f	itaukei	urban	0	0	2	0	0	0	0	0	0	0	0	Su
3	1-4	m	itaukei	urban	0	0	0	1	2	0	0	0	0	0	0	Mo
3	1-4	f	itaukei	urban	0	0	2	0	0	0	0	0	0	0	0	Mo
3	1-4	f	itaukei	urban	1	2	1	1	0	0	0	0	0	0	0	We
3	1-4	f	itaukei	urban	0	1	0	2	0	0	0	0	0	0	0	Th
3	1-4	f	itaukei	urban	2	2	3	2	1	0	0	0	0	0	0	Th
3	1-4	f	itaukei	urban	2	5	2	1	0	0	0	0	0	0	0	We
3	1-4	m	itaukei	urban	1	0	3	2	1	0	0	0	0	0	0	We
3	1-4	m	itaukei	urban	4	0	4	4	0	0	0	0	0	0	0	We
3	1-4	m	itaukei	urban	0	0	0	0	0	0	0	0	0	2	0	Fr
3	1-4	m	itaukei	urban	4	0	2	2	0	0	0	0	0	0	0	Tu
3	1-4	m	itaukei	urban	0	0	2	0	0	0	0	0	0	0	0	Th
3	1-4	m	itaukei	urban	1	3	1	0	1	0	0	0	0	0	0	Th
3	1-4	f	itaukei	urban	1	2	1	2	0	0	0	0	0	0	0	Th
3	1-4	m	itaukei	urban	0	0	0	0	0	2	2	1	1	0	0	Mo
3	1-4	m	itaukei	urban	0	2	1	1	0	0	0	0	0	0	0	We
3	1-4	m	itaukei	urban	0	1	2	0	0	0	0	0	0	0	0	Su
3	1-4	m	itaukei	urban	0	0	0	2	0	0	0	0	0	0	0	Su
4	1-4	f	itaukei	urban	0	1	2	0	1	0	0	0	0	0	0	Fr
4	1-4	f	itaukei	urban	0	0	2	0	0	0	0	0	0	0	0	We
4	1-4	m	itaukei	urban	0	0	0	2	1	0	0	0	0	0	0	Th
4	1-4	m	itaukei	urban	1	0	0	1	1	0	0	0	0	0	0	Th
4	1-4	f	itaukei	urban	4	0	2	0	3	0	0	0	0	0	0	We
4	1-4	m	itaukei	urban	0	0	0	0	0	0	0	2	0	0	0	Fr
4	1-4	m	itaukei	urban	4	4	0	4	0	0	0	0	0	0	0	Tu
4	1-4	m	itaukei	urban	4	6	4	0	0	0	0	0	0	0	0	Tu
4	1-4	m	itaukei	urban	0	0	0	0	0	0	0	2	1	0	0	Th
4	1-4	m	itaukei	urban	1	0	0	1	1	0	0	0	0	0	0	Th
4	1-4	f	itaukei	urban	4	0	8	4	2	0	0	0	0	0	0	We
4	1-4	m	itaukei	urban	3	1	10	1	0	0	0	0	0	0	0	We
4	1-4	m	itaukei	urban	1	3	1	1	3	0	0	0	0	0	0	We
4	1-4	f	itaukei	urban	2	1	1	3	0	0	0	0	0	0	1	We
5	5-14	f	itaukei	urban	2	3	0	0	0	0	0	0	0	0	0	Fr
5	5-14	f	itaukei	urban	0	0	1	0	0	0	0	1	0	0	0	Mo
5	5-14	m	itaukei	urban	1	0	2	0	0	0	0	0	0	0	0	Mo
5	5-14	f	itaukei	urban	0	0	1	1	0	0	0	0	0	0	0	We
5	5-14	m	itaukei	urban	0	0	0	2	0	0	0	0	0	0	0	We
5	5-14	f	itaukei	urban	2	2	2	2	0	0	0	0	0	0	0	We
5	5-14	m	itaukei	urban	4	6	4	0	0	0	0	0	0	0	0	Tu
5	5-14	m	itaukei	urban	8	2	4	0	0	0	0	0	0	0	0	Tu
5	5-14	f	itaukei	urban	0	1	2	0	0	0	0	0	0	0	1	Th
5	5-14	f	itaukei	urban	1	0	3	2	0	0	0	0	0	0	0	Th
5	5-14	m	itaukei	urban	0	1	0	2	0	0	0	0	0	0	0	Th
5	5-14	f	itaukei	urban	0	1	2	0	1	0	0	0	0	0	0	We
5	5-14	m	itaukei	urban	0	2	4	1	0	0	0	0	0	0	0	Sa
5	5-14	f	itaukei	urban	2	2	3	2	2	0	0	0	0	0	0	Mo
5	5-14	m	itaukei	urban	0	0	0	0	0	1	0	1	0	0	0	We
5	5-14	m	itaukei	urban	0	0	0	0	2	0	0	0	0	0	0	Tu
5	5-14	f	itaukei	urban	0	1	0	1	1	0	0	0	0	0	0	Tu
5	5-14	f	itaukei	urban	2	0	3	0	1	0	0	0	0	0	1	Tu
5	5-14	m	itaukei	urban	0	2	2	0	0	0	0	0	0	0	0	Tu
6	5-14	f	itaukei	urban	2	3	1	1	0	0	0	0	0	0	0	Fr
6	5-14	f	itaukei	urban	0	0	0	2	0	0	0	0	0	0	0	Mo
6	5-14	m	itaukei	urban	0	4	2	2	0	0	0	0	0	0	0	Mo
6	5-14	m	itaukei	urban	0	0	2	1	0	0	0	0	0	0	1	Fr
6	5-14	m	itaukei	urban	1	4	2	0	1	0	0	0	0	0	1	Fr
6	5-14	f	itaukei	urban	1	0	0	2	0	0	0	0	0	0	0	We
6	5-14	m	itaukei	urban	0	2	2	2	0	0	0	0	0	0	0	Th
6	5-14	f	itaukei	urban	1	5	1	1	0	0	0	0	0	0	1	We
6	5-14	f	itaukei	urban	0	0	1	1	0	0	0	0	0	0	0	Tu
7	5-14	m	itaukei	urban	0	0	0	0	0	0	1	1	3	0	0	Mo
7	5-14	f	itaukei	urban	0	1	2	0	2	0	0	0	0	0	0	Mo
7	5-14	f	itaukei	urban	0	3	0	1	1	0	0	0	0	0	0	Th
7	5-14	f	itaukei	urban	0	2	3	0	0	0	0	0	0	0	0	Su
8	5-14	m	itaukei	urban	1	1	1	2	2	0	0	0	0	0	1	Fr
8	5-14	f	itaukei	urban	0	5	1	2	2	0	0	0	0	0	1	Tu
8	5-14	m	itaukei	urban	1	1	2	2	1	0	0	0	0	0	0	Th
8	5-14	f	itaukei	urban	1	3	2	2	0	0	0	0	0	0	1	We
9	5-14	f	itaukei	urban	0	2	3	0	2	0	0	0	0	0	0	Mo
9	5-14	m	itaukei	urban	1	4	3	1	1	0	0	0	0	0	1	Fr
9	5-14	f	itaukei	urban	0	1	1	1	0	0	0	0	0	0	0	Su
9	5-14	f	itaukei	urban	0	6	1	1	0	0	0	0	0	0	1	Tu
9	5-14	m	itaukei	urban	2	4	3	1	3	0	0	0	0	0	1	Th
9	5-14	f	itaukei	urban	0	2	2	0	0	0	0	0	0	0	1	We
9	5-14	m	itaukei	urban	1	2	2	2	0	0	0	0	0	0	0	Su
10	5-14	f	itaukei	urban	0	2	4	2	0	0	0	0	0	0	0	Fr
10	5-14	m	itaukei	urban	1	0	2	1	0	0	0	0	0	0	0	We
10	5-14	m	itaukei	urban	1	6	2	0	2	0	0	0	0	0	1	Mo
10	5-14	m	itaukei	urban	1	0	2	0	0	0	0	0	0	0	1	We
10	5-14	f	itaukei	urban	0	0	0	0	0	1	2	0	2	0	1	We
10	5-14	m	itaukei	urban	1	1	2	2	0	0	0	0	0	0	0	Su
11	5-14	f	itaukei	urban	1	0	0	2	0	0	0	0	0	0	1	Fr
11	5-14	m	itaukei	urban	2	0	2	0	0	0	0	0	0	0	0	Mo
11	5-14	m	itaukei	urban	0	0	0	0	0	1	0	2	3	0	0	Mo
11	5-14	f	itaukei	urban	0	2	2	1	1	0	0	0	0	0	1	Fr
11	5-14	f	itaukei	urban	0	0	0	0	0	1	0	0	1	1	1	Sa
11	5-14	f	itaukei	urban	1	4	1	1	0	0	0	0	0	0	1	Th
11	5-14	f	itaukei	urban	1	3	2	2	0	0	0	0	0	0	0	We
11	5-14	f	itaukei	urban	1	5	0	2	0	0	1	0	0	0	1	We
11	5-14	m	itaukei	urban	0	0	0	0	0	1	3	0	2	0	0	Mo
11	5-14	f	itaukei	urban	5	5	6	7	8	0	0	0	0	0	1	We
11	5-14	f	itaukei	urban	0	0	0	0	0	0	0	0	0	0	0	Su
11	5-14	m	itaukei	urban	1	1	3	0	0	0	0	0	0	0	0	Tu
12	5-14	f	itaukei	urban	1	3	1	2	2	0	0	0	0	0	0	Fr
12	5-14	m	itaukei	urban	0	0	1	1	0	0	0	0	0	0	0	Mo
12	5-14	f	itaukei	urban	0	2	0	2	0	0	0	0	0	0	1	We
12	5-14	f	itaukei	urban	0	0	0	0	0	0	3	0	0	2	1	Th
12	5-14	f	itaukei	urban	0	0	0	0	0	0	3	0	2	1	1	Th
12	5-14	f	itaukei	urban	0	2	0	2	0	0	0	0	0	0	0	Su
12	5-14	m	itaukei	urban	0	1	1	2	0	0	0	0	0	0	0	Tu
13	5-14	f	itaukei	urban	0	4	0	2	0	0	0	0	0	0	1	Fr
13	5-14	m	itaukei	urban	0	0	0	0	0	0	1	0	2	0	1	Fr
13	5-14	f	itaukei	urban	0	2	0	2	0	0	0	0	0	0	0	Th
13	5-14	m	itaukei	urban	0	3	4	1	1	0	0	0	0	0	0	Su
13	5-14	m	itaukei	urban	0	0	0	2	0	0	0	0	0	0	0	Tu
13	5-14	m	itaukei	urban	0	0	0	0	0	0	7	0	2	0	1	Mo
14	5-14	f	itaukei	urban	0	1	3	2	0	0	0	0	0	0	1	Fr
14	5-14	f	itaukei	urban	0	1	2	1	0	0	0	0	0	0	1	We
14	5-14	m	itaukei	urban	0	0	0	2	0	0	0	0	0	0	0	Th
14	5-14	m	itaukei	urban	0	2	1	2	0	0	0	0	0	0	0	Fr
14	5-14	m	itaukei	urban	0	0	5	1	1	0	0	0	0	0	1	Th
14	5-14	m	itaukei	urban	1	5	0	2	0	0	0	0	0	0	1	Th
14	5-14	m	itaukei	urban	1	5	0	2	0	0	1	0	0	0	1	We
14	5-14	f	itaukei	urban	0	3	0	0	0	0	4	0	0	0	1	Mo
14	5-14	f	itaukei	urban	0	2	1	1	1	0	0	0	0	0	0	We
14	5-14	m	itaukei	urban	1	2	1	2	0	0	0	0	0	0	0	Su
14	5-14	f	itaukei	urban	0	6	0	2	0	0	0	0	0	0	1	Tu
15	15-34	f	itaukei	urban	0	0	4	2	0	0	0	0	0	0	1	Fr
15	15-34	m	itaukei	urban	0	4	5	0	2	0	0	0	0	0	0	Fr
15	15-34	f	itaukei	urban	0	1	4	2	0	0	0	0	0	0	1	Mo
15	15-34	f	itaukei	urban	0	0	0	0	0	1	0	3	1	0	1	Fr
15	15-34	f	itaukei	urban	0	0	6	0	2	0	0	0	0	0	1	Fr
15	15-34	f	itaukei	urban	0	0	0	2	0	0	0	0	0	0	0	We
15	15-34	m	itaukei	urban	2	1	3	1	0	0	0	0	0	0	0	Th
15	15-34	f	itaukei	urban	0	0	6	4	0	0	0	0	0	0	0	We
15	15-34	f	itaukei	urban	0	1	1	1	0	0	0	0	0	0	0	Fr
15	15-34	f	itaukei	urban	1	1	3	1	1	0	0	0	0	0	0	Su
15	15-34	f	itaukei	urban	0	1	2	1	0	0	0	0	0	0	1	We
15	15-34	f	itaukei	urban	0	0	0	2	0	0	0	0	0	0	0	Tu
15	15-34	f	itaukei	urban	1	0	0	1	0	0	0	0	0	0	0	Tu
15	15-34	f	itaukei	urban	0	2	0	1	1	0	0	0	0	0	0	Tu
16	15-34	m	itaukei	urban	5	6	5	6	7	0	0	0	0	0	1	Mo
16	15-34	m	itaukei	urban	1	1	2	1	0	0	0	0	0	0	0	Mo
16	15-34	f	itaukei	urban	0	0	0	4	0	0	0	0	0	0	0	We
16	15-34	f	itaukei	urban	0	2	4	0	0	0	0	0	0	0	1	We
16	15-34	m	itaukei	urban	0	2	1	2	0	0	0	0	0	0	0	Fr
16	15-34	f	itaukei	urban	0	0	0	0	0	0	0	4	2	0	1	Th
16	15-34	f	itaukei	urban	0	1	5	0	0	0	0	1	0	0	1	We
16	15-34	f	itaukei	urban	0	0	2	0	0	0	1	3	2	0	0	Mo
17	15-34	m	itaukei	urban	0	0	0	0	0	0	0	2	3	0	1	Fr
17	15-34	f	itaukei	urban	0	1	1	2	0	0	0	0	0	0	0	Th
17	15-34	f	itaukei	urban	0	0	4	3	0	0	0	0	0	0	0	We
17	15-34	f	itaukei	urban	0	2	2	1	1	0	0	0	0	0	0	Fr
17	15-34	m	itaukei	urban	1	0	2	0	1	0	0	0	0	0	0	Tu
17	15-34	m	itaukei	urban	0	2	4	4	0	0	0	0	0	0	0	We
17	15-34	f	itaukei	urban	0	0	0	1	1	0	0	0	0	0	0	We
17	15-34	f	itaukei	urban	0	0	2	0	2	0	0	0	0	0	1	Tu
18	15-34	f	itaukei	urban	7	8	8	15	10	0	0	0	0	0	1	Mo
18	15-34	m	itaukei	urban	1	2	9	2	0	0	0	0	0	0	1	Mo
18	15-34	f	itaukei	urban	0	0	3	1	2	0	0	0	0	0	0	Th
18	15-34	m	itaukei	urban	0	2	3	2	0	0	0	0	0	0	0	Fr
18	15-34	m	itaukei	urban	0	0	0	0	0	0	0	0	3	0	0	Th
18	15-34	f	itaukei	urban	0	0	2	0	0	0	0	0	0	0	0	Th
18	15-34	m	itaukei	urban	1	1	0	2	0	0	0	0	0	0	0	We
18	15-34	m	itaukei	urban	0	0	6	1	0	0	0	0	0	0	0	We
18	15-34	m	itaukei	urban	0	0	2	1	1	0	0	0	0	0	0	We
18	15-34	m	itaukei	urban	0	2	8	3	0	0	0	0	0	0	1	We
18	15-34	m	itaukei	urban	0	0	2	2	0	0	0	0	0	0	1	We
18	15-34	m	itaukei	urban	0	1	1	1	1	0	0	0	0	0	0	Su
19	15-34	f	itaukei	urban	1	0	1	0	0	0	0	0	0	0	0	Mo
19	15-34	f	itaukei	urban	0	0	0	0	0	0	0	0	2	0	0	Mo
19	15-34	f	itaukei	urban	0	0	3	0	0	0	0	0	0	0	1	Fr
19	15-34	m	itaukei	urban	0	0	0	2	0	0	0	0	0	0	0	We
19	15-34	f	itaukei	urban	1	2	2	1	1	0	0	0	0	0	0	Fr
19	15-34	m	itaukei	urban	1	2	2	3	0	0	0	0	0	0	0	Fr
19	15-34	f	itaukei	urban	0	0	0	2	2	0	0	0	0	0	0	We
19	15-34	m	itaukei	urban	0	1	2	2	0	0	0	0	0	0	0	We
19	15-34	f	itaukei	urban	0	0	0	1	1	0	0	0	0	0	0	We
19	15-34	f	itaukei	urban	0	0	0	0	0	0	0	0	0	0	0	Sa
19	15-34	m	itaukei	urban	1	2	2	0	0	0	0	0	0	0	0	Sa
19	15-34	f	itaukei	urban	2	1	3	1	2	0	0	0	0	0	0	We
20	15-34	f	itaukei	urban	2	0	0	2	0	0	0	0	0	0	0	Fr
20	15-34	f	itaukei	urban	0	0	0	2	0	0	0	0	0	0	0	Fr
20	15-34	f	itaukei	urban	0	0	2	0	0	0	0	0	0	0	0	Fr
20	15-34	m	itaukei	urban	0	0	0	0	0	0	1	1	2	0	1	Fr
20	15-34	f	itaukei	urban	0	0	5	2	0	0	0	0	0	0	1	We
20	15-34	m	itaukei	urban	0	0	3	4	0	0	0	0	0	0	0	Su
20	15-34	m	itaukei	urban	0	0	2	0	2	0	0	0	0	0	0	Tu
20	15-34	f	itaukei	urban	0	0	0	0	0	0	0	2	2	0	0	Th
20	15-34	m	itaukei	urban	0	0	0	2	0	0	0	0	0	0	0	We
20	15-34	f	itaukei	urban	0	0	0	0	2	0	0	0	0	0	0	We
20	15-34	m	itaukei	urban	1	0	2	0	0	0	0	0	0	0	0	Su
20	15-34	m	itaukei	urban	0	1	1	2	0	0	0	0	0	0	0	Su
21	15-34	f	itaukei	urban	1	0	1	2	0	0	0	0	0	0	0	Mo
21	15-34	f	itaukei	urban	1	0	2	2	0	0	0	0	0	0	0	Th
21	15-34	m	itaukei	urban	2	1	1	3	0	0	0	0	0	0	1	Th
21	15-34	m	itaukei	urban	2	0	6	0	2	0	0	0	0	0	0	Su
21	15-34	f	itaukei	urban	0	0	2	3	0	0	0	0	0	0	0	Su
21	15-34	f	itaukei	urban	0	0	7	3	1	0	0	0	1	0	1	Tu
21	15-34	m	itaukei	urban	0	0	0	0	0	0	0	2	1	0	0	Th
21	15-34	f	itaukei	urban	0	2	4	0	0	0	0	0	0	0	1	We
21	15-34	m	itaukei	urban	0	0	0	0	0	0	0	1	0	0	0	We
21	15-34	f	itaukei	urban	0	2	2	1	0	0	0	0	0	0	0	Mo
21	15-34	m	itaukei	urban	0	0	0	0	0	0	0	0	0	0	0	Tu
22	15-34	f	itaukei	urban	0	2	1	2	0	0	0	0	0	0	0	Mo
22	15-34	m	itaukei	urban	0	0	0	0	0	0	0	2	2	1	0	Mo
22	15-34	f	itaukei	urban	0	0	1	0	0	0	0	0	0	0	0	Mo
22	15-34	m	itaukei	urban	0	4	5	2	0	0	0	0	0	0	0	We
22	15-34	m	itaukei	urban	0	0	2	3	0	0	0	0	0	0	0	Su
22	15-34	f	itaukei	urban	0	10	0	4	2	0	0	0	0	0	0	Tu
22	15-34	m	itaukei	urban	0	2	0	2	0	0	0	0	0	0	0	Th
22	15-34	f	itaukei	urban	0	0	0	0	0	0	0	2	2	2	0	Th
22	15-34	m	itaukei	urban	5	4	11	7	8	0	0	0	0	0	1	We
22	15-34	m	itaukei	urban	2	0	2	3	0	0	0	2	0	0	1	We
22	15-34	f	itaukei	urban	0	0	0	0	0	1	0	1	0	0	0	We
22	15-34	m	itaukei	urban	0	0	1	3	0	0	0	0	0	0	0	Tu
23	15-34	f	itaukei	urban	2	0	2	0	0	0	0	0	0	0	0	We
23	15-34	m	itaukei	urban	1	1	4	2	1	0	0	0	0	0	0	Th
23	15-34	f	itaukei	urban	0	0	4	2	3	0	0	0	0	0	0	We
23	15-34	f	itaukei	urban	0	0	0	0	0	1	0	2	1	0	1	Fr
23	15-34	m	itaukei	urban	1	2	3	4	0	0	0	0	0	0	0	Su
23	15-34	m	itaukei	urban	0	0	4	0	0	0	0	0	0	0	0	Tu
23	15-34	f	itaukei	urban	2	0	1	0	0	0	0	0	0	0	0	Th
23	15-34	f	itaukei	urban	1	0	2	2	0	0	0	0	0	0	0	We
23	15-34	f	itaukei	urban	1	1	4	1	1	0	0	0	0	0	0	Th
23	15-34	m	itaukei	urban	0	0	0	0	0	0	0	9	0	0	1	Mo
23	15-34	f	itaukei	urban	0	0	0	0	0	0	0	0	1	0	0	We
23	15-34	f	itaukei	urban	0	0	4	1	0	0	0	0	0	0	0	Su
24	15-34	f	itaukei	urban	0	0	0	0	0	0	0	0	0	0	0	Mo
24	15-34	m	itaukei	urban	0	2	5	0	2	0	0	0	0	0	0	Th
24	15-34	f	itaukei	urban	0	0	1	0	0	0	0	0	0	0	0	Th
24	15-34	f	itaukei	urban	2	0	2	2	1	0	0	0	0	0	0	We
24	15-34	f	itaukei	urban	2	0	2	0	0	0	0	0	0	0	0	Mo
24	15-34	m	itaukei	urban	0	0	0	2	0	0	0	0	0	0	0	Tu
25	15-34	f	itaukei	urban	1	0	4	0	0	0	0	0	0	0	1	We
25	15-34	m	itaukei	urban	0	0	1	0	1	0	0	0	0	0	0	Su
25	15-34	m	itaukei	urban	0	0	7	0	0	0	0	0	0	0	0	Su
25	15-34	f	itaukei	urban	1	2	3	5	0	0	0	0	0	0	1	Su
25	15-34	f	itaukei	urban	2	1	0	1	0	0	0	0	0	0	1	Su
25	15-34	m	itaukei	urban	0	0	0	0	0	4	5	5	2	3	1	We
25	15-34	m	itaukei	urban	0	0	2	0	2	0	0	0	0	0	0	Su
25	15-34	m	itaukei	urban	0	0	4	0	1	0	0	0	0	0	0	Tu
26	15-34	f	itaukei	urban	6	1	4	2	0	0	0	0	0	0	1	Fr
26	15-34	m	itaukei	urban	0	2	4	2	0	0	0	0	0	0	0	Tu
26	15-34	f	itaukei	urban	0	1	4	0	0	0	0	0	0	0	1	Tu
26	15-34	m	itaukei	urban	0	1	8	3	0	0	0	0	1	0	1	Sa
26	15-34	m	itaukei	urban	2	1	1	0	0	0	0	0	0	0	0	Th
27	15-34	f	itaukei	urban	1	0	1	0	0	0	0	0	0	0	0	Fr
27	15-34	f	itaukei	urban	0	0	0	0	0	0	0	0	0	0	0	Mo
27	15-34	f	itaukei	urban	2	0	3	2	0	0	0	0	0	0	0	We
27	15-34	f	itaukei	urban	0	4	3	0	0	0	0	0	0	0	0	Th
27	15-34	f	itaukei	urban	4	0	2	0	3	0	0	0	0	0	0	We
27	15-34	m	itaukei	urban	0	0	0	0	0	0	0	0	0	0	0	We
28	15-34	f	itaukei	urban	1	1	7	0	1	0	0	0	0	0	1	Fr
28	15-34	f	itaukei	urban	0	0	0	0	0	1	0	1	0	0	0	Th
28	15-34	f	itaukei	urban	2	1	4	0	1	0	0	0	0	0	0	We
28	15-34	f	itaukei	urban	0	0	0	0	0	0	0	1	1	1	1	Fr
28	15-34	m	itaukei	urban	0	0	0	0	0	0	0	2	0	2	0	Th
28	15-34	f	itaukei	urban	5	6	7	10	5	0	0	0	0	0	1	We
28	15-34	f	itaukei	urban	0	0	0	0	0	0	0	0	0	0	0	Sa
28	15-34	f	itaukei	urban	0	1	1	0	0	0	0	0	0	0	0	We
29	15-34	f	itaukei	urban	0	2	1	1	1	0	0	0	0	0	1	Mo
29	15-34	f	itaukei	urban	0	0	3	0	0	0	0	0	0	0	1	Fr
29	15-34	f	itaukei	urban	1	0	2	2	1	0	0	0	0	0	0	We
29	15-34	f	itaukei	urban	0	3	2	1	0	0	0	0	0	0	0	Fr
29	15-34	f	itaukei	urban	0	0	2	0	0	0	0	0	0	0	0	Su
29	15-34	f	itaukei	urban	0	0	7	0	0	0	0	0	0	0	0	Su
29	15-34	m	itaukei	urban	0	4	4	0	6	0	0	0	0	0	0	Tu
29	15-34	m	itaukei	urban	9	9	7	10	8	0	0	0	0	0	1	We
29	15-34	m	itaukei	urban	0	0	3	0	0	0	0	0	0	0	0	We
29	15-34	f	itaukei	urban	2	0	1	0	0	0	0	0	0	0	0	We
29	15-34	f	itaukei	urban	0	2	0	1	0	0	0	0	0	0	0	We
29	15-34	m	itaukei	urban	0	0	0	0	0	0	0	0	0	0	1	Su
30	15-34	m	itaukei	urban	0	0	3	0	0	0	0	0	0	0	1	Fr
30	15-34	f	itaukei	urban	2	0	4	0	0	0	0	0	0	0	1	Fr
30	15-34	f	itaukei	urban	1	0	1	0	0	0	0	0	0	0	0	We
30	15-34	m	itaukei	urban	0	2	4	2	0	0	0	0	0	0	0	We
30	15-34	m	itaukei	urban	0	0	5	0	0	0	0	0	0	0	0	We
30	15-34	f	itaukei	urban	0	0	0	1	2	0	0	0	0	0	1	Fr
30	15-34	f	itaukei	urban	2	0	0	0	0	0	0	0	0	0	0	Tu
30	15-34	m	itaukei	urban	0	0	1	0	1	0	0	0	0	0	0	We
30	15-34	f	itaukei	urban	2	0	0	0	0	0	0	0	0	0	0	We
30	15-34	m	itaukei	urban	0	0	4	1	1	0	0	0	0	0	0	Su
30	15-34	m	itaukei	urban	1	0	3	0	0	0	0	0	0	0	0	Su
30	15-34	f	itaukei	urban	2	2	3	4	4	0	0	0	0	0	0	Su
30	15-34	f	itaukei	urban	2	0	1	0	0	0	0	0	0	0	0	Tu
31	15-34	m	itaukei	urban	0	0	0	0	0	0	2	1	0	0	0	Mo
31	15-34	m	itaukei	urban	0	0	2	2	1	0	0	0	0	0	0	Mo
31	15-34	m	itaukei	urban	2	2	1	3	0	0	0	0	0	0	0	We
31	15-34	f	itaukei	urban	0	0	0	0	0	1	1	0	1	0	0	Th
31	15-34	f	itaukei	urban	0	3	6	0	1	0	0	0	0	0	0	Tu
31	15-34	f	itaukei	urban	0	1	2	0	0	0	0	0	0	0	1	Sa
32	15-34	f	itaukei	urban	1	3	1	1	0	0	0	0	0	0	0	Fr
32	15-34	f	itaukei	urban	0	0	0	0	0	0	1	0	1	0	0	Mo
32	15-34	m	itaukei	urban	1	1	4	0	1	0	0	0	0	0	1	Fr
32	15-34	f	itaukei	urban	0	0	0	0	0	0	1	1	0	1	0	Th
32	15-34	f	itaukei	urban	0	0	0	0	0	1	2	1	0	0	0	Th
32	15-34	m	itaukei	urban	0	0	0	0	0	0	0	2	4	2	1	Sa
32	15-34	f	itaukei	urban	1	0	1	0	0	0	0	0	0	0	0	Th
32	15-34	m	itaukei	urban	1	3	3	2	0	0	0	0	0	0	1	We
32	15-34	m	itaukei	urban	0	0	1	0	0	0	0	0	0	0	1	We
32	15-34	f	itaukei	urban	0	0	0	0	0	0	0	0	0	0	0	Mo
32	15-34	f	itaukei	urban	0	1	0	0	0	0	0	0	0	0	0	Su
33	15-34	f	itaukei	urban	0	1	0	0	0	0	0	0	0	0	0	Mo
33	15-34	f	itaukei	urban	2	2	1	0	0	0	0	0	0	0	0	Mo
33	15-34	f	itaukei	urban	4	2	0	4	0	0	0	0	0	0	0	We
33	15-34	f	itaukei	urban	0	0	0	0	0	0	1	0	2	0	0	We
33	15-34	m	itaukei	urban	0	0	0	0	0	0	0	2	5	1	1	Fr
33	15-34	m	itaukei	urban	0	3	4	0	0	0	0	0	0	0	0	Tu
33	15-34	f	itaukei	urban	0	0	0	0	0	0	2	0	2	0	1	Th
33	15-34	f	itaukei	urban	0	2	2	0	3	0	2	2	0	3	0	Th
33	15-34	f	itaukei	urban	1	1	4	0	1	0	0	0	0	0	0	We
33	15-34	f	itaukei	urban	6	6	5	7	6	0	0	0	0	0	1	Th
33	15-34	f	itaukei	urban	0	0	0	0	0	0	0	0	1	0	0	Mo
33	15-34	m	itaukei	urban	2	2	1	2	1	0	0	0	0	0	0	Tu
34	15-34	m	itaukei	urban	0	0	2	2	0	0	0	0	0	0	1	Fr
34	15-34	m	itaukei	urban	1	2	38	0	0	0	0	0	0	0	0	Mo
34	15-34	f	itaukei	urban	0	1	0	1	0	0	0	0	0	0	0	We
34	15-34	f	itaukei	urban	1	3	1	2	0	0	0	0	0	0	0	Th
34	15-34	m	itaukei	urban	0	0	0	0	0	0	0	0	0	0	1	Su
34	15-34	m	itaukei	urban	0	0	0	0	0	0	0	0	1	0	0	Sa
34	15-34	f	itaukei	urban	1	2	1	1	0	0	0	0	0	0	0	Th
34	15-34	f	itaukei	urban	0	2	1	1	0	0	0	0	0	0	0	Th
34	15-34	f	itaukei	urban	0	0	0	0	0	0	2	0	1	0	0	We
35	35-54	f	itaukei	urban	0	0	0	0	0	1	0	0	1	0	0	Fr
35	35-54	m	itaukei	urban	0	0	3	0	0	0	0	0	0	0	1	Tu
35	35-54	f	itaukei	urban	0	0	0	0	0	1	1	1	1	0	0	Sa
35	35-54	m	itaukei	urban	0	0	0	0	0	1	0	1	0	0	0	We
35	35-54	m	itaukei	urban	0	0	0	0	0	0	0	2	0	0	0	We
36	35-54	f	itaukei	urban	0	1	0	1	2	0	0	0	0	0	1	Fr
36	35-54	m	itaukei	urban	0	0	0	0	0	0	1	4	2	1	1	Mo
36	35-54	f	itaukei	urban	1	1	2	2	2	0	0	0	0	0	1	Th
36	35-54	f	itaukei	urban	1	2	0	2	0	0	0	0	0	0	0	Sa
37	35-54	f	itaukei	urban	0	6	0	2	2	0	0	0	0	0	1	Mo
37	35-54	m	itaukei	urban	0	0	0	0	0	0	1	0	1	0	1	Fr
37	35-54	f	itaukei	urban	0	0	0	0	0	0	0	0	1	0	1	Fr
37	35-54	f	itaukei	urban	1	5	1	2	2	0	0	0	0	0	1	We
37	35-54	m	itaukei	urban	0	2	0	1	0	0	0	0	0	0	1	Th
37	35-54	f	itaukei	urban	0	0	0	0	0	0	0	0	0	0	0	We
37	35-54	f	itaukei	urban	0	0	0	0	0	0	2	1	1	0	0	Tu
37	35-54	f	itaukei	urban	0	2	1	1	1	0	0	0	0	0	0	Sa
37	35-54	f	itaukei	urban	1	2	2	1	0	0	0	0	0	0	0	Th
37	35-54	f	itaukei	urban	1	2	1	1	0	0	0	0	0	0	0	Th
37	35-54	f	itaukei	urban	2	3	2	1	1	0	0	0	0	0	0	We
38	35-54	f	itaukei	urban	2	1	1	1	0	0	0	0	0	0	0	Fr
38	35-54	f	itaukei	urban	2	4	2	1	0	0	0	0	0	0	0	Mo
38	35-54	f	itaukei	urban	0	0	0	0	0	0	1	0	1	0	0	Sa
38	35-54	f	itaukei	urban	0	0	0	0	0	0	0	2	1	1	0	We
38	35-54	m	itaukei	urban	0	0	2	0	0	0	0	0	0	0	0	We
39	35-54	f	itaukei	urban	1	0	0	0	1	0	0	0	0	0	0	Th
39	35-54	m	itaukei	urban	0	0	1	3	1	0	0	0	0	0	1	We
39	35-54	f	itaukei	urban	0	5	0	1	0	0	0	0	0	0	0	We
39	35-54	f	itaukei	urban	2	1	2	1	1	0	0	0	0	0	0	We
39	35-54	m	itaukei	urban	0	0	0	0	0	0	0	0	1	0	0	Mo
39	35-54	f	itaukei	urban	1	1	0	2	0	0	0	0	0	0	0	We
39	35-54	m	itaukei	urban	0	1	2	1	1	0	0	0	0	0	0	Su
39	35-54	f	itaukei	urban	0	2	0	0	0	0	0	0	0	0	0	Tu
40	35-54	m	itaukei	urban	0	1	1	1	0	0	0	0	0	0	0	Mo
40	35-54	m	itaukei	urban	0	3	2	0	0	0	0	0	0	0	0	Th
40	35-54	m	itaukei	urban	0	3	0	2	0	0	0	0	0	0	0	We
40	35-54	f	itaukei	urban	0	0	1	0	0	1	2	1	2	0	0	Th
40	35-54	f	itaukei	urban	1	3	3	2	0	0	0	0	0	0	0	We
40	35-54	m	itaukei	urban	1	3	1	2	0	0	0	0	0	0	0	We
41	35-54	f	itaukei	urban	0	0	0	0	0	0	0	0	0	0	0	We
42	35-54	f	itaukei	urban	0	0	0	1	0	0	0	0	0	0	0	Mo
42	35-54	f	itaukei	urban	0	0	0	0	0	0	0	0	2	0	0	Sa
42	35-54	f	itaukei	urban	1	3	2	0	2	0	0	0	0	0	0	We
42	35-54	m	itaukei	urban	0	0	0	0	0	0	0	0	0	0	0	Tu
43	35-54	f	itaukei	urban	0	1	1	1	0	0	0	0	0	0	0	Su
43	35-54	f	itaukei	urban	0	1	1	1	0	0	0	0	0	0	0	Sa
43	35-54	m	itaukei	urban	0	0	0	2	0	0	0	0	0	0	1	Th
43	35-54	m	itaukei	urban	0	0	0	0	0	0	0	0	0	0	1	Tu
44	35-54	f	itaukei	urban	0	0	6	4	0	0	0	0	0	0	0	We
44	35-54	m	itaukei	urban	0	0	2	1	0	0	0	0	0	0	0	Fr
44	35-54	m	itaukei	urban	0	3	0	1	0	0	0	0	0	0	0	We
44	35-54	f	itaukei	urban	0	1	1	1	0	0	0	0	0	0	0	We
44	35-54	f	itaukei	urban	0	2	4	2	0	0	0	3	3	0	1	We
45	35-54	f	itaukei	urban	2	0	2	2	0	0	0	0	0	0	0	We
45	35-54	f	itaukei	urban	0	0	2	1	0	0	0	0	0	0	0	We
45	35-54	f	itaukei	urban	0	0	2	0	0	0	0	0	0	0	0	We
45	35-54	f	itaukei	urban	0	0	0	0	0	0	0	0	1	1	0	Mo
46	35-54	m	itaukei	urban	0	0	0	0	0	0	0	1	2	0	1	Mo
46	35-54	f	itaukei	urban	0	0	0	0	0	0	0	4	1	0	0	Mo
46	35-54	f	itaukei	urban	0	0	0	1	0	0	0	0	0	0	0	Fr
46	35-54	f	itaukei	urban	0	2	3	2	0	0	0	0	0	0	0	We
46	35-54	f	itaukei	urban	0	0	0	0	0	1	0	3	2	0	0	Fr
46	35-54	f	itaukei	urban	0	0	7	0	0	0	0	0	0	0	1	Th
46	35-54	m	itaukei	urban	0	0	3	0	1	0	0	0	0	0	0	We
46	35-54	m	itaukei	urban	0	0	0	0	0	0	0	0	1	7	1	Sa
46	35-54	f	itaukei	urban	0	0	2	2	0	0	0	0	0	0	0	We
47	35-54	m	itaukei	urban	0	0	1	0	1	0	0	0	0	0	0	Th
47	35-54	f	itaukei	urban	0	0	0	0	0	0	0	0	0	0	1	We
47	35-54	m	itaukei	urban	0	0	1	3	0	0	0	0	0	0	0	NA
47	35-54	f	itaukei	urban	0	0	0	0	0	0	0	3	1	0	0	Sa
47	35-54	m	itaukei	urban	0	0	0	1	0	0	0	0	0	0	0	Su
48	35-54	f	itaukei	urban	0	0	0	1	0	0	0	0	0	0	0	Fr
48	35-54	f	itaukei	urban	1	0	1	1	0	0	0	0	0	0	0	Mo
48	35-54	f	itaukei	urban	0	1	2	1	0	0	0	0	0	0	1	We
48	35-54	f	itaukei	urban	3	0	2	0	1	0	0	0	0	0	0	Tu
48	35-54	f	itaukei	urban	0	0	4	0	3	0	0	0	0	0	0	We
48	35-54	m	itaukei	urban	0	1	4	2	2	0	0	0	0	0	0	Tu
48	35-54	m	itaukei	urban	0	0	0	0	0	0	0	0	1	0	0	Th
48	35-54	m	itaukei	urban	0	0	0	0	0	1	2	0	2	0	0	Sa
48	35-54	f	itaukei	urban	0	1	3	3	0	0	0	0	0	0	0	Th
48	35-54	f	itaukei	urban	1	1	2	0	1	0	0	0	0	0	0	Th
48	35-54	f	itaukei	urban	0	0	0	1	1	0	0	0	0	0	0	Th
48	35-54	f	itaukei	urban	0	3	0	1	0	0	0	0	0	0	0	We
48	35-54	f	itaukei	urban	0	0	2	6	0	0	0	0	0	0	1	We
48	35-54	f	itaukei	urban	7	8	10	11	10	0	0	0	0	0	1	We
48	35-54	f	itaukei	urban	0	0	2	2	0	0	0	0	0	0	0	Tu
49	35-54	m	itaukei	urban	0	0	0	1	0	0	0	0	0	0	0	Fr
49	35-54	f	itaukei	urban	0	0	2	3	0	0	0	0	0	0	0	Su
49	35-54	f	itaukei	urban	0	2	3	2	0	0	0	0	0	0	0	Th
49	35-54	f	itaukei	urban	0	0	0	0	0	0	0	1	0	1	0	Mo
49	35-54	f	itaukei	urban	0	0	0	0	0	0	0	0	0	0	0	Tu
50	35-54	m	itaukei	urban	0	0	0	1	0	0	0	0	0	0	0	Fr
50	35-54	m	itaukei	urban	0	0	2	0	0	0	0	0	0	0	0	Su
50	35-54	f	itaukei	urban	0	0	1	1	0	0	0	0	0	0	0	We
51	35-54	f	itaukei	urban	0	1	3	0	1	0	0	0	0	0	0	Su
51	35-54	m	itaukei	urban	0	0	2	3	0	0	0	0	0	0	0	Su
51	35-54	f	itaukei	urban	0	0	1	1	1	0	0	0	0	0	0	Su
51	35-54	f	itaukei	urban	0	1	0	1	0	0	0	0	0	0	0	Tu
51	35-54	f	itaukei	urban	0	1	1	2	0	0	0	0	0	0	1	We
51	35-54	f	itaukei	urban	0	1	0	0	2	0	0	0	0	0	0	We
51	35-54	m	itaukei	urban	1	3	2	0	0	0	0	0	0	0	0	Su
52	35-54	m	itaukei	urban	1	0	0	1	0	0	0	0	0	0	0	Mo
52	35-54	f	itaukei	urban	0	0	2	0	1	0	0	0	0	0	0	We
52	35-54	f	itaukei	urban	0	0	0	0	0	0	0	2	1	0	0	Th
52	35-54	m	itaukei	urban	0	0	0	0	0	0	0	0	0	0	0	Th
52	35-54	f	itaukei	urban	0	0	1	1	1	0	0	0	0	0	1	We
52	35-54	m	itaukei	urban	1	0	2	0	0	0	0	0	0	0	0	Su
53	35-54	m	itaukei	urban	0	0	2	1	0	0	0	0	0	0	0	Mo
53	35-54	m	itaukei	urban	1	1	0	1	1	0	0	0	0	0	1	Fr
53	35-54	m	itaukei	urban	0	0	0	0	0	0	0	0	0	0	1	Sa
53	35-54	m	itaukei	urban	0	2	5	1	0	0	0	0	0	0	0	Th
53	35-54	m	itaukei	urban	0	0	0	0	0	0	0	0	0	0	0	We
54	35-54	m	itaukei	urban	0	0	0	2	0	0	0	0	0	0	0	Tu
54	35-54	f	itaukei	urban	0	0	0	0	0	0	0	0	0	0	1	We
54	35-54	m	itaukei	urban	0	1	1	2	0	0	0	0	0	0	0	Tu
55	55+	m	itaukei	urban	0	0	0	0	0	0	0	0	0	0	1	Fr
55	55+	f	itaukei	urban	0	1	1	0	0	0	0	0	0	0	0	Su
55	55+	f	itaukei	urban	0	0	0	0	1	0	0	0	0	0	0	Th
55	55+	f	itaukei	urban	1	0	3	2	0	0	0	0	0	0	1	We
55	55+	m	itaukei	urban	0	0	0	0	0	0	0	0	1	0	0	Mo
55	55+	f	itaukei	urban	0	0	0	0	0	1	0	2	0	1	0	We
56	55+	m	itaukei	urban	0	0	0	0	0	0	0	3	1	0	1	Fr
56	55+	f	itaukei	urban	0	0	0	0	0	1	0	2	0	1	0	Fr
56	55+	m	itaukei	urban	0	0	2	1	0	0	0	0	0	0	0	Th
56	55+	m	itaukei	urban	0	1	2	1	0	0	0	0	0	0	0	We
56	55+	m	itaukei	urban	0	0	0	0	0	0	0	0	1	0	0	We
57	55+	f	itaukei	urban	0	0	1	0	1	0	0	0	0	0	0	Mo
57	55+	m	itaukei	urban	0	0	0	0	0	0	1	1	1	0	0	Mo
57	55+	f	itaukei	urban	0	0	0	0	0	0	0	0	0	0	1	Mo
57	55+	m	itaukei	urban	0	0	1	2	0	0	0	0	0	0	0	Fr
57	55+	m	itaukei	urban	0	0	0	1	0	0	0	0	0	0	1	We
57	55+	f	itaukei	urban	0	0	0	0	0	0	0	1	0	0	0	Th
57	55+	m	itaukei	urban	0	0	0	0	0	0	0	0	0	0	1	Sa
58	55+	f	itaukei	urban	0	0	0	0	0	0	0	0	0	2	0	We
58	55+	m	itaukei	urban	0	0	0	0	0	0	0	0	2	0	0	Th
58	55+	m	itaukei	urban	0	0	0	0	0	0	0	0	1	1	0	We
58	55+	m	itaukei	urban	0	0	0	0	0	0	0	0	0	0	0	Sa
58	55+	m	itaukei	urban	1	0	1	1	1	0	0	0	0	0	0	Th
58	55+	f	itaukei	urban	2	3	1	5	8	0	0	0	0	0	1	We
59	55+	m	itaukei	urban	0	0	0	0	0	0	4	2	1	1	0	Mo
59	55+	f	itaukei	urban	2	3	2	1	2	0	0	0	0	0	0	We
59	55+	m	itaukei	urban	1	0	1	0	1	0	0	0	0	0	0	Mo
60	55+	f	itaukei	urban	0	0	0	0	0	0	0	3	0	0	0	Mo
60	55+	m	itaukei	urban	0	0	0	0	0	0	0	0	1	1	0	Mo
60	55+	f	itaukei	urban	0	0	0	0	0	0	1	0	1	0	0	We
61	55+	m	itaukei	urban	2	1	3	0	1	0	0	0	0	0	0	Su
62	55+	f	itaukei	urban	0	0	1	0	0	0	0	0	0	0	0	Fr
63	55+	f	itaukei	urban	0	0	0	0	0	0	2	0	4	0	1	Mo
63	55+	f	itaukei	urban	1	0	5	0	0	0	0	0	0	0	0	Fr
63	55+	m	itaukei	urban	0	0	0	0	0	0	0	0	1	0	0	Mo
63	55+	f	itaukei	urban	0	0	1	2	0	0	0	0	0	0	0	Su
65	55+	m	itaukei	urban	0	0	0	0	1	0	0	0	0	0	0	Fr
65	55+	f	itaukei	urban	3	0	2	0	2	0	0	0	0	0	0	We
65	55+	f	itaukei	urban	1	0	1	2	1	0	0	0	0	0	0	We
65	55+	m	itaukei	urban	0	0	3	1	1	0	0	0	0	0	0	Su
65	55+	m	itaukei	urban	0	0	1	0	2	0	0	0	0	0	0	Th
65	55+	m	itaukei	urban	0	0	0	0	0	0	0	0	0	0	0	We
66	55+	m	itaukei	urban	0	0	2	0	6	0	0	0	0	0	0	We
66	55+	m	itaukei	urban	0	0	0	0	0	0	0	0	1	1	0	Mo
67	55+	m	itaukei	urban	0	0	0	0	1	0	0	0	0	0	0	Fr
67	55+	m	itaukei	urban	1	1	4	0	2	0	0	0	0	0	0	Th
67	55+	f	itaukei	urban	0	0	0	0	0	1	0	3	2	1	0	Mo
67	55+	f	itaukei	urban	1	0	2	0	0	0	0	0	0	0	0	Tu
68	55+	f	itaukei	urban	0	2	2	0	1	0	0	0	0	0	0	Tu
68	55+	f	itaukei	urban	0	0	0	0	0	0	0	0	2	0	0	Mo
69	55+	m	itaukei	urban	0	0	1	0	1	0	0	0	0	0	0	Fr
69	55+	f	itaukei	urban	0	0	0	0	0	0	0	0	0	1	0	Mo
69	55+	m	itaukei	urban	0	0	0	0	0	0	0	0	0	1	1	Mo
70	55+	m	itaukei	urban	1	2	0	0	1	0	0	0	0	0	0	Mo
70	55+	m	itaukei	urban	0	0	2	0	1	0	0	0	0	0	0	Tu
71	55+	m	itaukei	urban	0	0	1	2	0	0	0	0	0	0	0	We
71	55+	f	itaukei	urban	0	0	0	0	0	0	0	0	0	0	0	We
73	55+	f	itaukei	urban	1	2	0	2	0	0	0	0	0	0	0	We
73	55+	f	itaukei	urban	0	0	0	0	1	0	0	0	0	0	0	Th
73	55+	f	itaukei	urban	0	2	1	2	0	0	0	0	0	0	0	Su
73	55+	m	itaukei	urban	0	0	0	0	0	0	0	0	0	0	0	Th
73	55+	f	itaukei	urban	0	3	2	2	0	0	0	0	0	0	0	Th
74	55+	m	itaukei	urban	0	0	0	0	1	0	0	0	0	0	0	Tu
74	55+	m	itaukei	urban	0	1	0	1	0	0	0	0	0	0	0	We
75	55+	m	itaukei	urban	0	0	0	0	2	0	0	0	0	0	0	Th
75	55+	m	itaukei	urban	1	2	4	0	0	0	0	0	0	0	0	Su
76	55+	m	itaukei	urban	0	0	0	0	1	0	0	0	0	0	0	Mo
77	55+	f	itaukei	urban	0	0	0	1	1	0	0	0	0	0	0	Fr
77	55+	m	itaukei	urban	0	0	0	2	1	0	0	0	0	0	0	Th
79	55+	m	itaukei	urban	0	1	2	1	1	0	0	0	0	0	0	Th
80	55+	f	itaukei	urban	0	0	0	0	0	0	0	0	0	0	0	Th
85	55+	m	itaukei	urban	0	0	0	0	0	0	0	0	0	3	0	Fr
1	1-4	m	itaukei	periurban	0	0	2	0	0	0	0	0	0	0	0	Tu
2	1-4	f	itaukei	periurban	0	1	1	0	0	0	0	0	0	0	0	Su
2	1-4	m	itaukei	periurban	0	0	1	0	0	0	0	0	0	0	0	Tu
2	1-4	m	itaukei	periurban	0	4	1	1	1	0	0	0	0	0	0	Mo
2	1-4	f	itaukei	periurban	0	0	0	0	0	0	1	0	1	0	0	Tu
3	1-4	m	itaukei	periurban	0	0	0	0	0	0	0	2	1	1	0	We
3	1-4	f	itaukei	periurban	0	0	2	0	0	0	0	0	0	0	0	Th
3	1-4	f	itaukei	periurban	1	0	2	3	0	0	0	0	0	0	0	Tu
4	1-4	m	itaukei	periurban	0	0	2	0	0	0	0	0	0	0	0	Su
4	1-4	f	itaukei	periurban	0	0	1	1	1	0	0	0	0	0	0	Su
4	1-4	f	itaukei	periurban	1	0	1	0	0	0	0	0	0	0	0	Th
4	1-4	m	itaukei	periurban	0	0	1	0	2	0	0	0	0	0	0	Th
4	1-4	m	itaukei	periurban	1	1	1	1	0	0	0	0	0	0	0	Mo
4	1-4	m	itaukei	periurban	0	0	0	0	0	0	1	1	2	1	0	Mo
5	5-14	m	itaukei	periurban	6	0	1	1	0	0	0	0	0	0	1	Fr
5	5-14	f	itaukei	periurban	0	0	0	1	2	0	0	0	0	0	0	Su
5	5-14	m	itaukei	periurban	1	1	2	0	0	0	0	0	0	0	0	Su
5	5-14	f	itaukei	periurban	1	1	0	2	0	0	0	0	0	0	0	Tu
5	5-14	m	itaukei	periurban	0	2	1	5	0	0	0	0	0	0	0	We
5	5-14	f	itaukei	periurban	0	9	1	2	0	0	0	0	0	0	1	We
5	5-14	f	itaukei	periurban	0	0	1	2	0	0	0	0	0	0	0	Fr
5	5-14	m	itaukei	periurban	0	0	0	0	0	1	0	0	2	0	0	Th
6	5-14	m	itaukei	periurban	0	2	0	0	0	0	0	0	0	0	1	Th
6	5-14	f	itaukei	periurban	1	2	1	1	0	0	0	0	0	0	0	Sa
6	5-14	f	itaukei	periurban	0	1	0	2	0	0	0	0	0	0	0	Fr
6	5-14	m	itaukei	periurban	0	3	0	0	0	0	2	2	0	1	1	Tu
7	5-14	m	itaukei	periurban	0	4	1	0	0	0	0	0	0	0	1	Tu
7	5-14	f	itaukei	periurban	0	0	0	0	0	1	2	2	0	0	1	We
7	5-14	m	itaukei	periurban	0	0	0	0	0	0	2	2	0	0	1	Th
7	5-14	m	itaukei	periurban	0	0	0	0	0	0	1	1	2	1	0	Th
7	5-14	f	itaukei	periurban	0	0	0	0	0	0	1	0	2	1	1	Th
7	5-14	f	itaukei	periurban	0	2	2	2	0	0	0	0	0	0	0	Th
8	5-14	f	itaukei	periurban	0	1	0	2	0	0	0	0	0	0	1	Fr
8	5-14	m	itaukei	periurban	0	0	1	1	0	0	0	0	0	0	0	Su
8	5-14	f	itaukei	periurban	0	0	0	0	0	0	0	0	0	0	1	Mo
8	5-14	m	itaukei	periurban	1	2	0	2	0	0	0	0	0	0	0	Mo
8	5-14	f	itaukei	periurban	2	0	2	2	0	0	0	0	0	0	0	Th
9	5-14	f	itaukei	periurban	0	0	0	0	0	0	0	0	0	0	1	Fr
9	5-14	f	itaukei	periurban	0	2	0	2	0	0	0	0	0	0	1	Fr
9	5-14	f	itaukei	periurban	0	0	2	0	0	0	0	0	0	0	0	Fr
9	5-14	m	itaukei	periurban	0	0	0	0	0	0	1	1	2	0	0	Su
9	5-14	m	itaukei	periurban	0	0	0	0	0	1	7	1	0	0	0	We
9	5-14	m	itaukei	periurban	0	0	0	0	0	0	1	0	2	0	1	We
9	5-14	m	itaukei	periurban	0	0	0	0	0	0	4	0	2	0	1	Th
9	5-14	m	itaukei	periurban	0	0	0	0	0	0	1	1	2	1	0	Th
9	5-14	f	itaukei	periurban	0	3	4	2	0	0	0	0	0	0	1	Th
10	5-14	f	itaukei	periurban	0	0	0	2	0	0	0	0	0	0	0	Su
10	5-14	m	itaukei	periurban	0	0	0	0	2	0	0	0	0	0	0	Su
10	5-14	f	itaukei	periurban	0	0	0	0	0	0	1	2	1	2	1	We
10	5-14	m	itaukei	periurban	0	1	0	0	0	0	0	0	0	0	0	Fr
11	5-14	m	itaukei	periurban	0	5	1	2	0	0	0	0	0	0	1	Fr
11	5-14	m	itaukei	periurban	0	0	0	2	0	0	0	0	0	0	0	Su
11	5-14	f	itaukei	periurban	0	0	0	0	0	0	1	0	2	0	1	We
11	5-14	f	itaukei	periurban	1	0	3	2	0	0	0	0	0	0	0	Th
11	5-14	f	itaukei	periurban	0	0	0	0	0	0	0	0	0	2	0	Mo
11	5-14	f	itaukei	periurban	0	2	0	0	0	0	0	1	2	0	1	Tu
11	5-14	m	itaukei	periurban	0	0	0	0	0	1	1	1	1	0	1	Th
12	5-14	m	itaukei	periurban	0	0	0	0	0	0	2	1	2	0	0	Su
12	5-14	f	itaukei	periurban	1	0	0	2	0	0	0	0	0	0	0	Su
12	5-14	f	itaukei	periurban	0	0	2	0	0	0	0	0	0	0	0	Su
12	5-14	m	itaukei	periurban	0	7	0	1	0	0	0	0	0	0	1	Tu
12	5-14	f	itaukei	periurban	0	0	0	0	0	0	2	1	1	0	1	We
12	5-14	f	itaukei	periurban	0	2	2	0	0	0	0	0	0	0	0	Th
12	5-14	f	itaukei	periurban	0	5	0	2	0	0	0	0	0	0	1	Fr
12	5-14	m	itaukei	periurban	0	3	1	1	0	0	0	0	0	0	0	Mo
12	5-14	m	itaukei	periurban	0	7	4	2	0	0	0	0	0	0	1	Th
13	5-14	m	itaukei	periurban	0	7	0	2	0	0	0	0	0	0	0	Fr
13	5-14	m	itaukei	periurban	0	1	0	0	0	0	0	0	1	0	1	Fr
13	5-14	f	itaukei	periurban	0	2	2	0	0	0	0	0	0	0	0	Su
13	5-14	f	itaukei	periurban	0	0	0	0	0	0	1	0	1	0	1	Th
13	5-14	m	itaukei	periurban	0	1	1	2	0	0	0	0	0	0	1	Fr
13	5-14	m	itaukei	periurban	0	2	0	2	0	0	0	0	0	0	1	Fr
13	5-14	f	itaukei	periurban	0	0	0	0	0	0	1	0	2	0	1	Th
13	5-14	f	itaukei	periurban	0	7	0	2	0	0	0	0	0	0	1	Th
13	5-14	m	itaukei	periurban	0	0	0	1	1	0	0	0	0	0	0	Th
14	5-14	f	itaukei	periurban	0	0	0	0	0	0	1	1	2	0	0	Su
14	5-14	m	itaukei	periurban	0	2	0	2	0	0	0	0	0	0	0	Su
14	5-14	m	itaukei	periurban	1	2	0	0	5	0	0	0	0	0	0	Sa
14	5-14	f	itaukei	periurban	0	0	0	0	0	1	6	1	0	0	1	Tu
15	15-34	m	itaukei	periurban	0	1	1	1	0	0	0	0	0	0	0	Su
15	15-34	f	itaukei	periurban	1	0	1	1	1	0	0	0	0	0	0	Su
15	15-34	f	itaukei	periurban	0	0	5	0	1	0	0	0	0	0	1	Th
16	15-34	m	itaukei	periurban	0	1	3	3	0	0	0	0	0	0	0	Su
16	15-34	m	itaukei	periurban	0	5	1	2	1	0	0	0	0	0	0	Tu
16	15-34	m	itaukei	periurban	0	0	1	1	1	0	0	0	0	0	0	Tu
17	15-34	m	itaukei	periurban	0	0	0	0	0	1	0	1	4	0	0	Fr
17	15-34	f	itaukei	periurban	0	0	0	0	0	0	0	3	1	0	1	We
17	15-34	m	itaukei	periurban	0	0	0	0	0	0	0	3	1	2	1	Tu
18	15-34	m	itaukei	periurban	0	0	0	0	0	0	0	0	3	0	0	Fr
18	15-34	m	itaukei	periurban	0	0	9	3	0	0	0	0	0	0	0	Th
18	15-34	f	itaukei	periurban	2	1	1	1	0	0	0	0	0	0	0	Tu
18	15-34	m	itaukei	periurban	0	0	6	0	0	0	0	0	0	0	1	Fr
18	15-34	f	itaukei	periurban	0	0	0	1	0	0	0	0	0	0	0	Fr
18	15-34	f	itaukei	periurban	0	0	0	0	0	0	0	0	2	0	0	Mo
18	15-34	f	itaukei	periurban	0	0	0	0	0	0	0	1	0	0	0	Mo
18	15-34	f	itaukei	periurban	0	0	0	0	0	0	0	2	2	0	1	Tu
18	15-34	f	itaukei	periurban	0	0	0	0	0	0	0	0	2	0	0	Th
18	15-34	m	itaukei	periurban	1	1	3	2	0	0	0	0	0	0	0	Th
19	15-34	f	itaukei	periurban	0	0	0	0	0	0	0	1	2	0	0	Fr
19	15-34	m	itaukei	periurban	0	0	3	0	1	0	0	0	0	0	0	Su
19	15-34	m	itaukei	periurban	0	0	2	1	0	0	0	0	0	0	0	Tu
19	15-34	f	itaukei	periurban	1	0	0	1	2	0	0	0	0	0	0	We
19	15-34	m	itaukei	periurban	0	0	0	0	0	0	0	1	2	0	0	Tu
19	15-34	f	itaukei	periurban	0	0	0	0	0	0	0	0	2	0	0	Th
19	15-34	f	itaukei	periurban	0	0	0	0	0	0	0	2	2	0	1	Th
20	15-34	m	itaukei	periurban	0	0	1	0	0	0	0	0	2	0	1	Fr
20	15-34	f	itaukei	periurban	0	0	3	2	1	0	0	0	0	0	0	Su
20	15-34	m	itaukei	periurban	0	2	2	0	0	0	0	0	0	0	0	Su
20	15-34	m	itaukei	periurban	0	2	1	0	0	0	0	0	0	0	0	Tu
20	15-34	f	itaukei	periurban	1	0	1	0	2	0	0	0	0	0	0	Tu
20	15-34	f	itaukei	periurban	0	0	1	1	0	0	0	0	0	0	1	Th
20	15-34	f	itaukei	periurban	0	0	1	2	0	0	0	0	0	0	0	Fr
20	15-34	f	itaukei	periurban	0	0	0	0	0	2	2	0	4	0	0	Mo
20	15-34	m	itaukei	periurban	0	0	2	1	1	0	0	0	0	0	0	Tu
21	15-34	m	itaukei	periurban	0	0	0	0	0	0	0	0	0	0	0	Fr
21	15-34	f	itaukei	periurban	0	0	3	2	1	0	0	0	0	0	0	Su
21	15-34	m	itaukei	periurban	0	0	2	2	0	0	0	0	0	0	0	Su
21	15-34	m	itaukei	periurban	0	0	0	2	0	0	0	0	0	0	0	Su
21	15-34	f	itaukei	periurban	1	1	4	2	1	0	0	0	0	0	1	We
21	15-34	f	itaukei	periurban	2	0	2	1	0	0	0	0	0	0	1	Th
21	15-34	f	itaukei	periurban	0	0	0	0	0	1	0	1	0	2	0	Tu
22	15-34	f	itaukei	periurban	0	1	3	1	0	0	0	0	0	0	0	Su
22	15-34	f	itaukei	periurban	2	0	1	0	0	0	0	0	0	0	0	Mo
22	15-34	f	itaukei	periurban	0	0	4	2	0	0	0	0	0	0	1	Th
23	15-34	m	itaukei	periurban	0	0	1	1	2	0	0	0	0	0	0	Su
23	15-34	m	itaukei	periurban	0	0	1	0	2	0	0	0	0	0	0	Tu
23	15-34	f	itaukei	periurban	0	0	0	0	0	0	0	3	5	0	0	Tu
23	15-34	m	itaukei	periurban	0	0	0	2	0	0	0	0	0	0	1	Fr
23	15-34	f	itaukei	periurban	0	0	3	0	0	0	0	0	0	0	1	Fr
23	15-34	f	itaukei	periurban	0	0	6	0	1	0	0	0	0	0	0	Fr
23	15-34	f	itaukei	periurban	0	0	0	0	0	1	0	2	0	1	0	Th
23	15-34	m	itaukei	periurban	0	2	6	2	1	0	0	0	0	0	0	Th
23	15-34	m	itaukei	periurban	0	0	0	0	0	0	0	0	1	1	1	Th
24	15-34	f	itaukei	periurban	1	0	1	0	0	0	0	0	0	0	0	Su
24	15-34	m	itaukei	periurban	1	0	1	0	2	0	0	0	0	0	0	We
24	15-34	f	itaukei	periurban	1	0	1	0	1	0	0	0	0	0	0	Tu
24	15-34	f	itaukei	periurban	1	1	1	0	0	0	0	0	0	0	0	Tu
24	15-34	f	itaukei	periurban	1	1	0	0	1	0	0	0	0	0	0	Mo
24	15-34	m	itaukei	periurban	0	0	0	0	0	0	1	1	0	0	0	Th
24	15-34	f	itaukei	periurban	4	0	4	0	0	0	0	0	0	0	0	Th
25	15-34	m	itaukei	periurban	1	1	4	0	0	0	0	0	0	0	0	We
25	15-34	f	itaukei	periurban	3	0	1	0	0	0	0	0	0	0	0	Th
25	15-34	f	itaukei	periurban	1	0	1	0	0	0	0	0	0	0	0	Th
25	15-34	f	itaukei	periurban	0	0	1	0	0	2	0	3	0	1	1	Tu
25	15-34	f	itaukei	periurban	0	1	0	2	0	0	0	0	0	0	0	Mo
26	15-34	f	itaukei	periurban	4	2	1	1	0	0	0	0	0	0	0	Fr
26	15-34	m	itaukei	periurban	1	1	1	0	0	0	0	0	0	0	0	Su
26	15-34	f	itaukei	periurban	0	0	0	0	0	0	0	0	0	0	0	Tu
26	15-34	f	itaukei	periurban	0	0	0	0	0	1	1	1	0	0	0	We
26	15-34	m	itaukei	periurban	0	0	2	0	0	0	0	0	0	0	0	Sa
26	15-34	f	itaukei	periurban	0	0	0	0	0	1	0	1	0	0	0	Tu
26	15-34	f	itaukei	periurban	1	1	11	2	0	0	0	0	0	0	1	Th
26	15-34	m	itaukei	periurban	0	2	1	3	0	0	0	0	0	0	0	Th
27	15-34	m	itaukei	periurban	1	0	1	0	0	0	0	0	0	0	0	Su
27	15-34	m	itaukei	periurban	0	0	1	0	0	0	0	0	0	0	0	Th
27	15-34	m	itaukei	periurban	0	0	0	0	0	0	0	0	0	0	1	Sa
27	15-34	f	itaukei	periurban	2	2	0	2	0	0	0	0	0	0	0	Mo
27	15-34	m	itaukei	periurban	0	0	0	0	0	0	0	0	0	0	0	Tu
28	15-34	m	itaukei	periurban	1	0	1	0	0	0	0	0	0	0	0	NA
28	15-34	m	itaukei	periurban	0	0	1	1	1	0	0	0	0	0	0	Su
28	15-34	m	itaukei	periurban	0	0	3	0	0	0	0	0	0	0	0	Sa
28	15-34	f	itaukei	periurban	0	0	0	0	0	0	0	0	1	0	0	Mo
28	15-34	m	itaukei	periurban	0	0	0	0	0	0	0	2	0	0	1	Th
29	15-34	f	itaukei	periurban	0	1	0	3	0	0	0	0	0	0	0	Fr
29	15-34	m	itaukei	periurban	0	3	3	0	0	0	0	0	0	0	0	Su
29	15-34	f	itaukei	periurban	0	0	0	1	0	0	0	0	0	0	0	Fr
29	15-34	f	itaukei	periurban	0	0	0	1	1	0	0	0	0	0	0	Mo
29	15-34	f	itaukei	periurban	0	0	0	0	0	0	0	1	0	2	0	Mo
29	15-34	m	itaukei	periurban	0	0	1	0	0	0	0	0	0	0	0	Th
30	15-34	m	itaukei	periurban	0	0	1	0	2	0	0	0	0	0	0	Fr
30	15-34	m	itaukei	periurban	0	0	0	5	0	0	0	0	0	0	1	Fr
30	15-34	m	itaukei	periurban	0	0	0	0	2	0	0	0	0	0	0	Su
30	15-34	f	itaukei	periurban	2	0	0	2	0	0	0	0	0	0	0	Tu
30	15-34	f	itaukei	periurban	0	0	0	0	0	0	0	0	1	0	1	Tu
30	15-34	m	itaukei	periurban	2	0	1	0	0	0	0	0	0	0	0	Sa
30	15-34	m	itaukei	periurban	2	1	1	1	2	0	0	0	0	0	0	Fr
30	15-34	f	itaukei	periurban	0	0	0	0	0	0	0	3	2	0	0	Mo
30	15-34	f	itaukei	periurban	1	3	1	0	0	0	0	0	0	0	1	Mo
30	15-34	m	itaukei	periurban	0	0	1	0	0	1	0	2	1	0	1	Th
31	15-34	f	itaukei	periurban	1	0	3	0	0	0	0	0	0	0	0	Tu
31	15-34	f	itaukei	periurban	0	0	0	0	0	0	0	0	0	0	0	We
31	15-34	m	itaukei	periurban	0	0	0	0	0	1	0	1	0	0	0	Mo
31	15-34	f	itaukei	periurban	0	0	0	0	0	0	2	0	2	0	0	Mo
31	15-34	f	itaukei	periurban	0	2	0	1	0	0	0	0	0	0	0	Mo
32	15-34	f	itaukei	periurban	1	2	1	0	0	0	0	0	0	0	0	We
32	15-34	m	itaukei	periurban	0	1	0	0	0	0	0	0	0	0	1	Sa
32	15-34	f	itaukei	periurban	0	0	0	0	0	1	5	0	1	1	0	Mo
32	15-34	m	itaukei	periurban	0	0	0	0	0	1	1	4	0	2	1	Th
33	15-34	m	itaukei	periurban	1	2	2	0	0	0	0	0	0	0	0	Fr
33	15-34	m	itaukei	periurban	2	4	0	1	0	0	0	0	0	0	0	Tu
33	15-34	m	itaukei	periurban	0	0	3	0	2	0	0	0	0	0	0	We
33	15-34	f	itaukei	periurban	0	0	0	0	0	0	1	2	0	0	0	Mo
33	15-34	m	itaukei	periurban	0	0	0	0	0	0	0	1	2	0	0	Tu
33	15-34	f	itaukei	periurban	0	0	0	0	0	0	0	1	0	0	0	Th
33	15-34	f	itaukei	periurban	0	0	0	0	0	5	6	7	10	10	1	Th
34	15-34	f	itaukei	periurban	0	0	1	1	0	0	0	0	0	0	0	Mo
34	15-34	f	itaukei	periurban	4	6	0	2	0	0	0	0	0	0	0	Mo
35	35-54	m	itaukei	periurban	1	3	0	1	0	0	0	0	0	0	0	Su
35	35-54	f	itaukei	periurban	1	0	0	2	0	0	0	0	0	0	0	Fr
35	35-54	f	itaukei	periurban	0	0	0	0	0	1	0	2	1	2	0	Tu
36	35-54	f	itaukei	periurban	0	3	2	3	1	0	0	0	0	0	1	Fr
37	35-54	m	itaukei	periurban	2	4	0	2	0	0	0	0	0	0	0	Fr
37	35-54	m	itaukei	periurban	0	3	1	1	1	0	0	0	0	0	0	Su
37	35-54	f	itaukei	periurban	0	0	4	1	1	0	0	0	0	0	0	Su
37	35-54	m	itaukei	periurban	0	1	0	0	2	0	0	0	0	0	0	Tu
37	35-54	f	itaukei	periurban	1	3	1	2	1	0	0	0	0	0	0	Th
37	35-54	m	itaukei	periurban	0	0	0	0	0	0	2	3	1	0	1	Sa
37	35-54	f	itaukei	periurban	0	0	0	0	0	1	0	0	1	0	0	Tu
37	35-54	f	itaukei	periurban	0	0	0	0	0	0	1	0	1	0	0	Tu
37	35-54	f	itaukei	periurban	0	0	0	0	0	0	0	0	0	0	0	Th
37	35-54	f	itaukei	periurban	0	0	0	0	0	0	1	3	1	0	0	Th
37	35-54	m	itaukei	periurban	0	0	0	0	0	0	1	1	2	0	1	Th
38	35-54	m	itaukei	periurban	0	0	0	0	0	1	2	1	0	0	0	Tu
38	35-54	m	itaukei	periurban	0	0	0	0	0	0	0	2	1	0	0	Tu
39	35-54	f	itaukei	periurban	0	0	0	1	0	0	0	0	0	0	0	Su
39	35-54	f	itaukei	periurban	0	0	0	0	0	0	0	0	1	0	0	We
40	35-54	m	itaukei	periurban	0	2	0	2	2	0	0	0	0	0	0	Tu
40	35-54	f	itaukei	periurban	1	2	3	2	0	0	0	0	0	0	0	We
40	35-54	f	itaukei	periurban	0	3	2	2	0	0	0	0	0	0	0	Mo
40	35-54	m	itaukei	periurban	0	0	1	0	0	0	0	0	0	0	1	Th
40	35-54	f	itaukei	periurban	0	0	0	0	0	5	6	7	10	10	1	Th
40	35-54	f	itaukei	periurban	0	0	0	0	0	8	6	10	20	19	1	Th
41	35-54	m	itaukei	periurban	0	0	0	0	0	0	3	1	1	1	0	Su
41	35-54	f	itaukei	periurban	0	0	1	1	0	0	0	0	0	0	0	Th
42	35-54	f	itaukei	periurban	0	0	1	0	0	0	0	0	0	0	0	Tu
42	35-54	m	itaukei	periurban	0	0	0	0	0	0	0	0	0	0	0	Th
43	35-54	m	itaukei	periurban	2	0	0	1	0	0	0	0	0	0	0	Tu
43	35-54	f	itaukei	periurban	0	0	1	0	0	0	0	0	0	0	0	Tu
44	35-54	m	itaukei	periurban	0	0	0	0	0	0	0	3	1	0	0	Su
44	35-54	f	itaukei	periurban	0	0	0	0	0	0	0	0	0	0	0	Sa
44	35-54	m	itaukei	periurban	0	0	0	2	0	0	0	0	0	0	0	Fr
45	35-54	m	itaukei	periurban	0	0	0	0	0	0	0	0	0	0	1	Tu
45	35-54	f	itaukei	periurban	0	1	4	4	3	0	0	0	0	0	1	Th
45	35-54	m	itaukei	periurban	0	0	0	0	0	0	0	0	0	0	1	Sa
45	35-54	f	itaukei	periurban	0	0	1	0	0	0	0	0	0	0	0	Tu
47	35-54	f	itaukei	periurban	0	0	2	0	0	0	0	0	0	0	0	Su
47	35-54	f	itaukei	periurban	0	0	0	0	0	0	0	1	1	0	0	We
47	35-54	f	itaukei	periurban	0	0	0	0	0	0	1	1	1	2	0	Th
48	35-54	f	itaukei	periurban	0	0	1	0	0	0	0	0	0	0	0	Th
48	35-54	f	itaukei	periurban	0	0	0	2	1	0	0	0	0	0	0	Fr
49	35-54	f	itaukei	periurban	0	0	0	1	0	0	0	0	0	0	0	Fr
49	35-54	f	itaukei	periurban	0	0	0	0	0	0	0	2	1	0	0	We
49	35-54	m	itaukei	periurban	2	1	8	2	0	0	0	0	0	0	0	Th
50	35-54	f	itaukei	periurban	0	0	0	0	0	0	0	0	0	0	0	Su
50	35-54	m	itaukei	periurban	0	0	0	0	0	0	0	1	0	1	0	Th
50	35-54	m	itaukei	periurban	0	1	0	1	0	0	0	0	0	0	1	Tu
51	35-54	f	itaukei	periurban	0	0	0	0	0	0	0	0	1	0	0	Th
51	35-54	f	itaukei	periurban	0	0	0	0	0	0	0	0	2	0	0	Th
52	35-54	m	itaukei	periurban	0	0	0	0	0	0	1	1	1	0	1	Sa
52	35-54	m	itaukei	periurban	0	0	0	0	0	0	0	0	1	0	0	Sa
53	35-54	f	itaukei	periurban	0	2	1	0	1	0	0	0	0	0	0	Fr
53	35-54	f	itaukei	periurban	0	5	2	0	1	0	0	0	0	0	0	Su
53	35-54	m	itaukei	periurban	0	0	0	0	0	0	0	0	1	0	0	We
53	35-54	f	itaukei	periurban	0	0	1	0	0	0	0	0	0	0	0	Fr
54	35-54	f	itaukei	periurban	0	0	0	0	0	0	0	0	0	0	1	Tu
54	35-54	f	itaukei	periurban	0	0	0	0	0	1	0	2	0	1	0	We
54	35-54	m	itaukei	periurban	0	0	0	0	0	0	0	0	0	0	1	Tu
55	55+	m	itaukei	periurban	0	0	0	0	0	0	0	3	0	1	0	Fr
55	55+	m	itaukei	periurban	0	0	0	1	0	0	0	0	0	0	0	Tu
55	55+	f	itaukei	periurban	0	0	0	2	0	0	0	0	0	0	0	Fr
55	55+	m	itaukei	periurban	0	0	0	0	0	0	0	3	1	0	0	Th
55	55+	f	itaukei	periurban	0	0	0	0	1	0	0	0	0	0	0	Th
55	55+	m	itaukei	periurban	1	0	0	3	0	0	0	0	0	0	0	Th
56	55+	f	itaukei	periurban	0	0	1	0	1	0	0	0	0	0	0	Fr
56	55+	f	itaukei	periurban	0	0	0	0	2	0	0	0	0	0	0	Su
56	55+	f	itaukei	periurban	0	0	0	1	2	0	0	0	0	0	0	Fr
57	55+	f	itaukei	periurban	1	1	5	2	0	0	0	0	0	0	0	Tu
57	55+	m	itaukei	periurban	0	0	0	0	0	0	0	0	0	1	0	Sa
57	55+	m	itaukei	periurban	0	0	0	0	0	0	1	2	2	1	0	Th
58	55+	f	itaukei	periurban	0	0	1	2	0	0	0	0	0	0	0	Fr
58	55+	m	itaukei	periurban	0	0	0	0	0	1	0	5	1	0	0	Sa
59	55+	m	itaukei	periurban	0	0	0	0	1	0	0	0	0	0	0	Th
60	55+	m	itaukei	periurban	0	0	0	0	0	0	0	0	1	0	0	Su
61	55+	f	itaukei	periurban	0	0	2	1	1	0	0	0	0	0	0	Fr
61	55+	f	itaukei	periurban	0	0	0	0	0	0	0	0	1	0	0	Tu
61	55+	f	itaukei	periurban	0	0	0	0	0	0	0	1	0	1	0	Tu
62	55+	m	itaukei	periurban	1	2	3	3	2	0	0	0	0	0	0	Fr
63	55+	m	itaukei	periurban	0	0	0	0	0	1	0	2	1	0	0	We
65	55+	m	itaukei	periurban	0	0	0	0	0	0	1	0	0	1	0	Th
65	55+	f	itaukei	periurban	0	0	0	0	0	0	0	0	0	1	0	Th
66	55+	m	itaukei	periurban	0	0	0	0	2	0	0	0	0	0	0	Fr
66	55+	f	itaukei	periurban	0	0	3	3	0	0	0	0	0	0	0	Su
66	55+	f	itaukei	periurban	0	0	2	0	0	0	0	0	0	0	0	Su
66	55+	m	itaukei	periurban	0	0	0	0	0	0	0	0	0	0	0	Su
68	55+	m	itaukei	periurban	0	0	0	0	0	0	0	0	0	1	0	Su
68	55+	f	itaukei	periurban	0	0	0	0	0	0	0	0	0	0	0	Tu
69	55+	f	itaukei	periurban	0	0	0	0	0	1	0	1	0	0	0	We
72	55+	f	itaukei	periurban	0	0	0	0	1	0	0	0	0	0	0	Su
77	55+	f	itaukei	periurban	0	0	0	0	0	0	0	0	0	1	0	Tu
1	1-4	m	itaukei	rural	0	0	0	0	0	0	0	0	0	0	0	Sa
2	1-4	m	itaukei	rural	0	0	0	0	2	0	0	0	0	0	0	Th
2	1-4	f	itaukei	rural	6	2	0	2	4	0	0	0	0	0	0	We
2	1-4	m	itaukei	rural	0	0	0	0	0	0	0	2	1	0	0	Sa
2	1-4	f	itaukei	rural	0	0	0	0	0	0	0	0	0	2	0	We
2	1-4	f	itaukei	rural	1	0	2	1	1	0	0	0	0	0	0	Mo
2	1-4	m	itaukei	rural	1	0	2	0	0	0	0	0	0	0	0	We
3	1-4	m	itaukei	rural	2	0	1	1	0	0	0	0	0	0	0	Th
3	1-4	f	itaukei	rural	0	0	0	2	0	0	0	0	0	0	0	Th
3	1-4	m	itaukei	rural	0	1	1	2	0	0	0	0	0	0	0	We
3	1-4	m	itaukei	rural	0	0	1	1	1	0	0	0	0	0	0	Mo
3	1-4	m	itaukei	rural	1	1	2	1	1	0	0	0	0	0	0	Tu
3	1-4	m	itaukei	rural	1	4	2	0	0	0	0	0	0	0	0	Tu
3	1-4	f	itaukei	rural	2	2	2	0	0	0	0	0	0	0	0	We
3	1-4	f	itaukei	rural	0	0	0	0	2	0	0	0	0	0	0	Mo
3	1-4	m	itaukei	rural	0	0	0	0	2	0	0	0	0	0	0	Th
3	1-4	m	itaukei	rural	0	2	1	0	0	0	0	0	0	0	0	Fr
3	1-4	f	itaukei	rural	0	0	2	2	1	0	0	0	0	0	1	Mo
3	1-4	f	itaukei	rural	0	0	8	0	0	0	0	0	0	0	0	Mo
3	1-4	f	itaukei	rural	0	0	0	0	0	1	0	0	2	0	0	Tu
3	1-4	m	itaukei	rural	0	0	0	2	0	0	0	0	0	0	0	We
4	1-4	f	itaukei	rural	0	1	2	1	1	0	0	0	0	0	0	Th
4	1-4	m	itaukei	rural	6	0	0	0	0	0	0	0	0	0	1	Th
4	1-4	m	itaukei	rural	0	1	2	0	0	0	0	0	0	0	0	Th
4	1-4	f	itaukei	rural	2	0	0	2	0	0	0	0	0	0	0	Th
4	1-4	m	itaukei	rural	4	2	4	0	0	0	0	0	0	0	0	We
4	1-4	f	itaukei	rural	2	3	2	0	0	0	0	0	0	0	0	Tu
4	1-4	f	itaukei	rural	1	0	0	1	0	0	0	0	0	0	1	Tu
4	1-4	f	itaukei	rural	3	15	0	0	1	0	0	0	0	0	1	Th
4	1-4	m	itaukei	rural	0	0	0	1	1	0	0	0	0	0	0	Fr
4	1-4	m	itaukei	rural	0	0	3	1	1	0	0	0	0	0	0	Mo
4	1-4	m	itaukei	rural	2	4	1	1	0	0	0	0	0	0	0	Mo
4	1-4	m	itaukei	rural	2	2	2	1	0	0	0	0	0	0	0	Su
4	1-4	f	itaukei	rural	2	0	1	0	0	0	0	0	0	0	0	Tu
4	1-4	f	itaukei	rural	0	0	1	0	0	0	0	0	0	0	0	Sa
4	1-4	f	itaukei	rural	0	0	1	0	0	0	0	0	0	0	0	Sa
4	1-4	m	itaukei	rural	0	0	2	2	0	0	0	0	0	0	1	We
5	5-14	m	itaukei	rural	1	0	1	0	2	0	0	0	0	0	0	Th
5	5-14	f	itaukei	rural	0	2	2	2	2	0	0	0	0	0	0	We
5	5-14	m	itaukei	rural	0	0	1	1	0	0	0	0	0	0	0	Tu
5	5-14	f	itaukei	rural	1	1	1	1	1	0	0	0	0	0	1	Tu
5	5-14	m	itaukei	rural	0	0	2	0	0	0	0	0	0	0	0	Tu
5	5-14	f	itaukei	rural	0	0	2	0	1	0	0	0	0	0	0	Tu
5	5-14	m	itaukei	rural	1	2	0	2	0	0	0	0	0	0	1	Tu
5	5-14	m	itaukei	rural	1	1	1	2	0	0	0	0	0	0	0	Tu
5	5-14	m	itaukei	rural	1	0	2	2	0	0	0	0	0	0	0	Mo
5	5-14	m	itaukei	rural	7	11	1	0	0	0	0	0	0	0	1	Th
5	5-14	m	itaukei	rural	1	9	1	10	0	0	0	0	0	0	1	Th
5	5-14	f	itaukei	rural	0	22	1	0	0	0	0	0	0	0	1	We
5	5-14	m	itaukei	rural	4	2	4	0	0	0	0	0	0	0	1	Th
5	5-14	m	itaukei	rural	1	4	2	0	0	0	0	0	0	0	1	Th
5	5-14	f	itaukei	rural	2	4	2	0	0	0	0	0	0	0	0	Tu
5	5-14	m	itaukei	rural	7	5	1	0	0	0	0	0	0	0	1	Fr
5	5-14	m	itaukei	rural	0	1	2	3	0	0	0	0	0	0	0	Mo
5	5-14	f	itaukei	rural	0	0	2	0	0	0	0	0	0	0	0	Mo
5	5-14	f	itaukei	rural	0	0	1	0	0	0	0	0	0	0	0	Sa
5	5-14	f	itaukei	rural	1	23	1	2	0	0	0	0	0	0	1	Tu
6	5-14	f	itaukei	rural	0	0	0	2	0	0	0	0	0	0	1	Th
6	5-14	m	itaukei	rural	0	0	0	2	0	0	0	0	0	0	0	Th
6	5-14	f	itaukei	rural	0	1	3	4	0	0	0	0	0	0	0	Th
6	5-14	m	itaukei	rural	1	0	0	2	0	0	0	0	0	0	0	Tu
6	5-14	f	itaukei	rural	1	0	1	1	1	0	0	0	0	0	0	Mo
6	5-14	f	itaukei	rural	2	3	0	2	1	0	0	0	0	0	1	Mo
6	5-14	f	itaukei	rural	1	0	1	1	0	0	0	0	0	0	1	Fr
6	5-14	f	itaukei	rural	1	2	1	1	1	0	0	0	0	0	0	Th
6	5-14	m	itaukei	rural	2	3	1	1	0	0	0	0	0	0	1	We
6	5-14	m	itaukei	rural	0	0	0	0	0	0	1	2	0	0	0	Fr
6	5-14	m	itaukei	rural	2	2	1	1	0	0	0	0	0	0	1	Mo
6	5-14	f	itaukei	rural	1	7	0	1	0	0	0	0	0	0	1	Fr
6	5-14	f	itaukei	rural	0	6	2	0	1	0	0	0	0	0	1	Fr
6	5-14	m	itaukei	rural	1	10	1	2	0	0	0	0	0	0	0	Mo
6	5-14	m	itaukei	rural	3	4	2	2	0	0	0	0	0	0	1	Mo
6	5-14	f	itaukei	rural	1	3	0	2	0	0	0	0	0	0	0	Mo
6	5-14	m	itaukei	rural	0	0	1	2	0	0	0	0	0	0	0	We
7	5-14	f	itaukei	rural	1	6	0	2	0	0	0	0	0	0	1	We
7	5-14	f	itaukei	rural	0	1	2	0	0	0	0	0	0	0	1	Fr
7	5-14	m	itaukei	rural	0	0	2	0	0	0	0	0	0	0	1	Fr
7	5-14	m	itaukei	rural	0	0	0	0	0	0	0	11	0	2	1	Fr
7	5-14	f	itaukei	rural	2	6	4	3	0	0	0	0	0	0	0	NA
7	5-14	m	itaukei	rural	0	0	0	0	1	0	0	0	0	0	1	Fr
7	5-14	f	itaukei	rural	0	0	0	0	3	0	0	0	0	0	0	Mo
8	5-14	m	itaukei	rural	0	2	1	2	0	0	0	0	0	0	1	Th
8	5-14	f	itaukei	rural	1	1	2	0	0	0	0	0	0	0	1	Th
8	5-14	f	itaukei	rural	0	3	1	2	0	0	0	0	0	0	1	Tu
8	5-14	m	itaukei	rural	0	4	0	2	0	0	0	0	0	0	0	Mo
8	5-14	f	itaukei	rural	0	0	1	0	0	0	0	1	0	0	1	Fr
8	5-14	f	itaukei	rural	1	3	0	2	0	0	0	0	0	0	0	Tu
8	5-14	f	itaukei	rural	0	4	0	1	0	0	0	0	0	0	1	Mo
8	5-14	f	itaukei	rural	0	1	0	2	0	0	0	0	0	0	1	We
8	5-14	m	itaukei	rural	0	2	2	0	1	0	0	0	0	0	1	We
8	5-14	m	itaukei	rural	0	9	2	0	2	0	0	0	0	0	1	Th
9	5-14	m	itaukei	rural	0	0	0	2	0	0	0	0	0	0	0	Th
9	5-14	f	itaukei	rural	0	2	0	2	0	0	0	0	0	0	1	Fr
9	5-14	f	itaukei	rural	1	3	0	2	0	0	0	0	0	0	0	Tu
9	5-14	m	itaukei	rural	0	9	1	1	0	0	0	0	0	0	1	Tu
9	5-14	m	itaukei	rural	0	2	3	1	0	0	0	0	0	0	1	We
9	5-14	f	itaukei	rural	0	4	6	2	1	0	0	0	0	0	1	Mo
9	5-14	m	itaukei	rural	0	4	1	1	0	0	0	0	0	0	0	Mo
9	5-14	m	itaukei	rural	0	4	4	2	0	0	0	0	0	0	0	We
9	5-14	f	itaukei	rural	0	5	2	0	0	0	0	0	0	0	1	Th
9	5-14	m	itaukei	rural	0	2	1	2	0	0	0	0	0	0	0	Fr
9	5-14	m	itaukei	rural	0	0	3	0	0	0	0	0	0	0	0	Mo
9	5-14	m	itaukei	rural	0	4	1	3	0	0	0	0	0	0	1	We
10	5-14	m	itaukei	rural	0	3	0	2	0	0	0	0	0	0	1	Th
10	5-14	f	itaukei	rural	1	2	0	2	0	0	0	0	0	0	1	Th
10	5-14	f	itaukei	rural	0	8	3	2	0	0	0	0	0	0	1	Th
10	5-14	f	itaukei	rural	2	2	1	1	0	0	0	0	0	0	1	Tu
10	5-14	m	itaukei	rural	1	7	0	1	1	0	0	0	0	0	0	Tu
10	5-14	m	itaukei	rural	0	2	1	0	1	0	0	0	0	0	1	Th
10	5-14	f	itaukei	rural	2	1	3	2	0	0	0	0	0	0	1	Tu
10	5-14	m	itaukei	rural	1	1	1	1	0	0	0	0	0	0	0	Th
10	5-14	f	itaukei	rural	0	0	0	0	0	0	0	0	0	0	0	Mo
10	5-14	m	itaukei	rural	0	0	0	2	0	0	0	0	0	0	0	We
10	5-14	f	itaukei	rural	2	4	0	1	0	0	0	0	0	0	0	Sa
10	5-14	m	itaukei	rural	1	23	0	2	0	0	0	0	0	0	1	Th
10	5-14	f	itaukei	rural	0	5	0	0	0	0	0	3	0	0	1	Tu
10	5-14	m	itaukei	rural	0	2	3	2	0	0	3	0	0	0	1	Tu
11	5-14	f	itaukei	rural	0	1	0	2	0	0	0	0	0	0	1	Th
11	5-14	m	itaukei	rural	0	1	1	1	0	0	0	0	0	0	0	Tu
11	5-14	m	itaukei	rural	0	4	3	2	0	0	0	0	0	0	1	Mo
11	5-14	m	itaukei	rural	1	4	3	0	1	0	0	0	0	0	1	Tu
11	5-14	f	itaukei	rural	0	4	1	0	0	0	0	0	0	0	0	Tu
11	5-14	m	itaukei	rural	0	1	1	2	0	0	0	0	0	0	0	Fr
11	5-14	m	itaukei	rural	0	8	0	1	1	0	0	0	0	0	0	Tu
11	5-14	m	itaukei	rural	1	1	3	0	2	0	0	0	0	0	1	Fr
11	5-14	m	itaukei	rural	2	7	3	1	1	0	0	0	0	0	1	Tu
11	5-14	f	itaukei	rural	0	4	1	2	0	0	0	0	0	0	0	Mo
11	5-14	m	itaukei	rural	1	2	0	1	0	0	0	0	0	0	0	Tu
11	5-14	f	itaukei	rural	1	2	2	0	0	0	0	0	0	0	0	Sa
11	5-14	m	itaukei	rural	0	0	0	0	0	0	1	0	0	2	1	We
11	5-14	f	itaukei	rural	0	18	0	0	0	0	0	0	0	0	1	Th
11	5-14	m	itaukei	rural	0	0	0	2	0	0	0	0	0	0	1	Tu
11	5-14	m	itaukei	rural	0	0	0	2	0	0	0	0	0	0	0	We
12	5-14	m	itaukei	rural	0	1	2	0	0	0	0	0	0	0	1	Th
12	5-14	m	itaukei	rural	1	4	4	1	0	0	0	0	0	0	1	Th
12	5-14	m	itaukei	rural	0	5	3	2	0	0	0	0	0	0	0	Th
12	5-14	m	itaukei	rural	0	5	1	1	0	0	0	0	0	0	1	We
12	5-14	m	itaukei	rural	0	4	1	3	0	0	0	0	0	0	1	Mo
12	5-14	f	itaukei	rural	0	3	0	2	0	0	0	0	0	0	1	Mo
12	5-14	m	itaukei	rural	0	2	0	2	0	0	0	0	0	0	1	Tu
12	5-14	f	itaukei	rural	0	4	1	2	0	0	0	0	0	0	1	Fr
12	5-14	f	itaukei	rural	0	2	0	0	1	0	0	0	0	0	1	Tu
12	5-14	f	itaukei	rural	0	7	1	2	0	0	0	0	0	0	0	Tu
12	5-14	m	itaukei	rural	1	3	3	1	0	0	0	0	0	0	0	Tu
12	5-14	f	itaukei	rural	0	3	1	2	0	0	0	0	0	0	0	Tu
12	5-14	m	itaukei	rural	0	3	1	1	0	0	0	0	0	0	1	Th
12	5-14	f	itaukei	rural	0	1	0	0	0	0	4	0	2	1	1	Th
12	5-14	f	itaukei	rural	0	6	0	2	0	0	0	0	0	0	0	We
12	5-14	m	itaukei	rural	0	4	1	2	0	0	0	0	0	0	0	We
12	5-14	f	itaukei	rural	0	3	0	4	0	0	0	0	0	0	0	NA
12	5-14	m	itaukei	rural	0	4	0	2	0	0	0	0	0	0	1	We
12	5-14	f	itaukei	rural	0	0	0	0	0	0	7	0	0	0	1	We
12	5-14	f	itaukei	rural	0	4	3	2	0	0	0	0	0	0	1	Th
12	5-14	f	itaukei	rural	0	8	0	0	2	0	0	0	0	0	1	We
12	5-14	f	itaukei	rural	0	0	0	0	0	0	4	1	2	1	1	Tu
12	5-14	f	itaukei	rural	0	74	0	0	0	0	0	0	0	0	1	Mo
12	5-14	f	itaukei	rural	0	3	0	2	0	0	0	0	0	0	1	We
12	5-14	f	itaukei	rural	1	8	3	1	1	0	0	0	0	0	1	We
13	5-14	f	itaukei	rural	0	0	0	2	0	0	0	0	0	0	0	Th
13	5-14	m	itaukei	rural	0	5	2	2	0	0	0	0	0	0	1	Tu
13	5-14	f	itaukei	rural	0	1	0	0	0	0	2	0	1	1	1	Fr
13	5-14	m	itaukei	rural	14	16	0	1	0	0	0	0	0	0	0	NA
13	5-14	f	itaukei	rural	0	1	2	1	0	0	0	0	0	0	0	Su
13	5-14	m	itaukei	rural	2	2	0	2	1	0	0	0	0	0	0	We
13	5-14	f	itaukei	rural	1	4	0	2	0	0	0	0	0	0	0	Th
13	5-14	f	itaukei	rural	1	5	2	1	0	0	0	0	0	0	0	Th
13	5-14	m	itaukei	rural	0	2	0	0	1	0	0	0	0	0	0	Th
13	5-14	m	itaukei	rural	3	8	1	2	0	0	0	0	0	0	0	Th
13	5-14	m	itaukei	rural	0	6	1	1	0	0	0	0	0	0	1	Th
13	5-14	f	itaukei	rural	0	0	2	1	1	0	0	0	0	0	0	Th
13	5-14	f	itaukei	rural	0	0	0	0	0	0	3	0	0	0	0	Tu
13	5-14	m	itaukei	rural	0	3	2	2	0	0	0	0	0	0	1	Mo
13	5-14	m	itaukei	rural	0	6	0	0	2	0	0	0	0	0	1	Tu
14	5-14	m	itaukei	rural	0	6	1	1	1	0	0	0	0	0	1	Th
14	5-14	m	itaukei	rural	0	0	3	1	0	0	0	0	0	0	0	Th
14	5-14	f	itaukei	rural	0	5	1	2	0	0	0	0	0	0	1	Tu
14	5-14	m	itaukei	rural	0	5	2	2	0	0	0	0	0	0	0	Tu
14	5-14	f	itaukei	rural	0	3	0	2	0	0	0	0	0	0	1	Fr
14	5-14	f	itaukei	rural	0	5	2	1	0	0	0	0	0	0	1	Tu
14	5-14	m	itaukei	rural	0	10	0	2	1	0	0	0	0	0	1	Mo
14	5-14	f	itaukei	rural	0	3	3	0	0	0	0	0	0	0	0	Su
14	5-14	m	itaukei	rural	0	0	0	0	0	0	0	0	0	0	0	NA
14	5-14	f	itaukei	rural	0	0	0	0	0	1	3	1	1	0	1	Tu
14	5-14	f	itaukei	rural	1	5	1	0	0	0	0	0	0	0	1	Fr
14	5-14	m	itaukei	rural	0	1	1	2	0	0	0	0	0	0	1	Mo
14	5-14	f	itaukei	rural	0	2	0	2	0	0	0	0	0	0	1	Mo
15	15-34	f	itaukei	rural	0	0	1	2	0	0	0	0	0	0	1	Th
15	15-34	m	itaukei	rural	0	4	0	2	0	0	0	0	0	0	1	We
15	15-34	m	itaukei	rural	0	0	1	1	0	0	0	0	0	0	0	Fr
15	15-34	m	itaukei	rural	0	3	0	1	1	0	0	0	0	0	1	Th
15	15-34	m	itaukei	rural	2	2	8	3	0	0	0	0	0	0	0	Th
15	15-34	f	itaukei	rural	2	1	7	1	0	0	0	0	0	0	1	Th
15	15-34	m	itaukei	rural	0	0	0	0	0	0	0	0	0	0	0	NA
15	15-34	f	itaukei	rural	1	1	5	0	1	0	0	0	0	0	1	NA
15	15-34	m	itaukei	rural	0	4	3	3	0	0	0	0	0	0	0	We
15	15-34	m	itaukei	rural	0	0	0	0	0	1	0	4	2	0	1	Fr
15	15-34	m	itaukei	rural	0	0	6	2	0	0	0	0	0	0	1	Fr
15	15-34	m	itaukei	rural	0	1	0	0	0	0	0	0	0	0	0	Mo
16	15-34	f	itaukei	rural	0	2	2	2	0	0	0	0	0	0	1	Th
16	15-34	f	itaukei	rural	0	3	4	3	0	0	0	0	0	0	1	Th
16	15-34	m	itaukei	rural	0	1	0	0	1	0	0	0	0	0	1	Th
16	15-34	f	itaukei	rural	3	3	5	6	3	0	0	0	0	0	0	Th
16	15-34	m	itaukei	rural	0	4	6	2	0	0	0	0	0	0	1	We
16	15-34	f	itaukei	rural	1	1	0	2	0	0	0	0	0	0	0	Mo
16	15-34	m	itaukei	rural	0	0	0	0	0	0	0	0	0	0	1	Fr
16	15-34	f	itaukei	rural	0	1	7	2	0	0	0	0	0	0	1	We
16	15-34	m	itaukei	rural	0	0	0	0	0	2	2	2	0	2	0	Fr
16	15-34	f	itaukei	rural	0	0	0	0	0	1	0	2	2	2	0	Tu
16	15-34	m	itaukei	rural	0	0	4	0	2	0	0	0	0	0	0	We
17	15-34	m	itaukei	rural	0	0	1	11	0	0	0	0	0	0	1	Th
17	15-34	m	itaukei	rural	0	1	2	0	1	0	0	0	0	0	0	Tu
17	15-34	m	itaukei	rural	0	0	2	1	0	0	0	0	0	0	1	Tu
17	15-34	m	itaukei	rural	0	2	2	2	0	0	0	0	0	0	1	Mo
17	15-34	m	itaukei	rural	1	1	5	2	0	0	0	0	0	0	0	Mo
17	15-34	f	itaukei	rural	1	1	1	0	2	0	0	0	0	0	0	Tu
17	15-34	f	itaukei	rural	0	0	0	0	0	0	0	0	2	0	0	Th
17	15-34	f	itaukei	rural	1	3	2	2	0	0	0	0	0	0	0	Mo
17	15-34	f	itaukei	rural	0	1	1	1	0	0	0	0	0	0	0	We
17	15-34	m	itaukei	rural	0	0	4	4	0	0	0	0	0	0	0	Th
17	15-34	m	itaukei	rural	0	0	0	0	0	0	2	0	2	0	0	Sa
17	15-34	f	itaukei	rural	0	1	1	2	0	0	0	0	0	0	0	Fr
17	15-34	f	itaukei	rural	0	0	0	0	0	0	0	0	0	0	1	Sa
17	15-34	f	itaukei	rural	0	4	1	1	0	0	0	0	0	0	0	We
18	15-34	m	itaukei	rural	0	0	0	2	0	0	0	0	0	0	0	Th
18	15-34	f	itaukei	rural	2	1	4	2	0	0	0	0	0	0	0	Th
18	15-34	f	itaukei	rural	0	0	5	1	0	0	0	0	0	0	1	Fr
18	15-34	f	itaukei	rural	2	3	1	1	0	0	0	0	0	0	0	Fr
18	15-34	m	itaukei	rural	0	2	3	0	0	0	0	0	0	0	1	Mo
18	15-34	m	itaukei	rural	0	1	1	2	0	0	0	0	0	0	1	We
18	15-34	f	itaukei	rural	2	0	0	2	1	0	0	0	0	0	1	Sa
18	15-34	f	itaukei	rural	0	1	0	2	0	0	0	0	0	0	0	Sa
18	15-34	f	itaukei	rural	0	0	0	0	0	0	0	2	0	0	1	We
18	15-34	m	itaukei	rural	1	3	1	2	0	0	0	0	0	0	0	Mo
18	15-34	f	itaukei	rural	0	1	3	2	0	0	0	0	0	0	0	Fr
18	15-34	f	itaukei	rural	0	0	3	2	0	0	0	0	0	0	0	Fr
18	15-34	m	itaukei	rural	0	0	0	0	0	0	0	0	0	0	1	Mo
19	15-34	f	itaukei	rural	0	0	0	1	0	0	0	0	0	0	0	Th
19	15-34	m	itaukei	rural	0	0	2	1	0	0	0	0	0	0	0	Tu
19	15-34	f	itaukei	rural	0	0	3	2	0	0	0	0	0	0	1	Tu
19	15-34	f	itaukei	rural	1	1	1	1	1	0	0	0	0	0	0	Mo
19	15-34	m	itaukei	rural	0	0	5	0	2	0	0	0	0	0	1	Su
19	15-34	f	itaukei	rural	11	11	11	22	23	0	0	0	0	0	1	Fr
19	15-34	m	itaukei	rural	0	2	2	1	0	0	0	0	0	0	0	Tu
19	15-34	f	itaukei	rural	0	2	3	0	2	0	0	0	0	0	0	Th
19	15-34	f	itaukei	rural	0	0	0	0	0	0	1	0	1	0	0	Tu
19	15-34	m	itaukei	rural	1	0	5	1	0	0	0	0	0	0	0	Th
19	15-34	f	itaukei	rural	0	0	0	2	0	0	0	0	0	0	0	Th
19	15-34	m	itaukei	rural	0	0	1	0	0	0	0	0	0	0	0	Th
19	15-34	m	itaukei	rural	0	1	5	2	0	0	0	0	0	0	1	We
19	15-34	f	itaukei	rural	0	0	2	4	2	0	0	0	0	0	0	NA
19	15-34	f	itaukei	rural	0	6	6	0	0	0	0	0	0	0	0	Th
19	15-34	m	itaukei	rural	0	6	2	4	0	0	0	0	0	0	1	Th
19	15-34	m	itaukei	rural	2	2	2	2	0	0	0	0	0	0	0	We
19	15-34	f	itaukei	rural	1	0	3	2	0	0	0	0	0	0	0	We
19	15-34	f	itaukei	rural	0	0	0	0	0	0	1	1	1	0	0	We
19	15-34	m	itaukei	rural	0	0	0	2	2	0	0	0	0	0	0	Th
19	15-34	f	itaukei	rural	0	0	0	0	0	0	0	0	0	0	1	Mo
19	15-34	m	itaukei	rural	0	0	2	1	1	0	0	0	0	0	0	Tu
19	15-34	f	itaukei	rural	0	2	4	3	0	0	0	0	0	0	0	Tu
19	15-34	m	itaukei	rural	1	2	6	2	1	0	0	0	0	0	0	Tu
19	15-34	m	itaukei	rural	0	1	1	2	0	0	0	0	0	0	0	We
20	15-34	f	itaukei	rural	0	0	1	1	1	0	0	0	0	0	0	Th
20	15-34	f	itaukei	rural	0	0	1	0	1	0	0	0	0	0	0	Th
20	15-34	m	itaukei	rural	0	1	1	4	0	0	0	0	0	0	0	We
20	15-34	m	itaukei	rural	0	0	0	0	0	0	0	0	0	0	NA	Mo
20	15-34	f	itaukei	rural	0	0	0	0	0	0	0	0	0	0	0	Fr
20	15-34	f	itaukei	rural	0	0	0	4	0	0	0	0	0	0	1	Tu
20	15-34	f	itaukei	rural	1	0	0	0	0	0	0	0	0	0	0	Tu
20	15-34	f	itaukei	rural	0	2	6	4	0	0	0	0	0	0	0	Th
20	15-34	f	itaukei	rural	1	1	4	2	0	0	0	0	0	0	1	Th
20	15-34	m	itaukei	rural	0	0	2	1	2	0	0	0	0	0	0	Tu
20	15-34	m	itaukei	rural	0	0	2	4	0	0	0	0	0	0	0	We
20	15-34	m	itaukei	rural	0	1	6	1	0	0	0	0	0	0	0	We
20	15-34	m	itaukei	rural	0	4	8	4	0	0	0	0	0	0	0	NA
20	15-34	m	itaukei	rural	0	0	3	0	5	0	0	0	0	0	0	NA
20	15-34	NA	itaukei	rural	0	0	0	2	2	0	0	0	0	0	0	NA
20	15-34	f	itaukei	rural	0	0	2	1	0	0	0	0	0	0	1	Tu
20	15-34	m	itaukei	rural	0	0	1	0	2	0	0	0	0	0	1	Th
20	15-34	m	itaukei	rural	0	0	2	2	4	0	0	0	0	0	0	Sa
20	15-34	f	itaukei	rural	0	0	2	0	0	0	0	0	0	0	0	We
20	15-34	f	itaukei	rural	0	0	0	0	0	0	0	1	0	0	0	Fr
20	15-34	f	itaukei	rural	0	0	0	0	0	0	0	2	2	0	1	Tu
20	15-34	f	itaukei	rural	0	0	0	0	0	0	0	0	0	0	0	Mo
20	15-34	f	itaukei	rural	0	0	4	1	0	0	0	0	0	0	0	Mo
20	15-34	m	itaukei	rural	0	0	2	0	1	0	0	0	0	0	0	Sa
20	15-34	f	itaukei	rural	0	3	4	0	2	0	0	0	0	0	0	We
21	15-34	f	itaukei	rural	1	0	1	0	2	0	0	0	0	0	0	Th
21	15-34	m	itaukei	rural	0	1	1	2	0	0	0	0	0	0	0	Tu
21	15-34	f	itaukei	rural	0	0	4	3	0	0	0	0	0	0	0	We
21	15-34	f	itaukei	rural	1	2	3	1	0	0	0	0	0	0	0	Tu
21	15-34	f	itaukei	rural	2	2	3	4	2	0	0	0	0	0	0	Th
21	15-34	f	itaukei	rural	0	0	0	0	0	0	0	0	2	0	0	We
21	15-34	f	itaukei	rural	0	0	0	0	0	1	0	2	3	0	1	Tu
21	15-34	m	itaukei	rural	0	1	4	2	0	0	0	0	0	0	0	Fr
21	15-34	m	itaukei	rural	0	0	3	2	0	0	0	0	0	0	0	Mo
21	15-34	m	itaukei	rural	0	2	1	0	1	0	0	0	0	0	1	Mo
21	15-34	m	itaukei	rural	0	1	2	2	0	0	0	0	0	0	0	Mo
21	15-34	m	itaukei	rural	0	0	0	2	0	0	0	0	0	0	0	Mo
21	15-34	m	itaukei	rural	0	0	2	2	2	0	0	0	0	0	0	Tu
22	15-34	f	itaukei	rural	4	6	22	20	0	0	0	0	0	0	1	Th
22	15-34	f	itaukei	rural	1	2	2	0	0	0	0	0	0	0	0	Tu
22	15-34	f	itaukei	rural	0	0	2	0	1	0	0	0	0	0	0	We
22	15-34	f	itaukei	rural	0	0	0	0	0	0	0	0	0	0	0	Mo
22	15-34	f	itaukei	rural	2	0	0	0	2	0	0	0	0	0	0	Tu
22	15-34	m	itaukei	rural	0	1	4	2	0	0	0	0	0	0	0	Th
22	15-34	f	itaukei	rural	0	0	1	0	2	0	0	0	0	0	0	We
22	15-34	f	itaukei	rural	1	0	0	1	0	0	0	0	0	0	1	Th
22	15-34	m	itaukei	rural	2	3	4	0	0	0	0	0	0	0	1	Th
22	15-34	m	itaukei	rural	0	0	1	0	2	0	0	0	0	0	0	Mo
22	15-34	m	itaukei	rural	0	4	6	4	0	0	0	0	0	0	0	Tu
22	15-34	m	itaukei	rural	0	0	8	4	0	0	0	0	0	0	0	Tu
22	15-34	m	itaukei	rural	1	1	3	0	1	0	0	0	0	0	1	We
23	15-34	f	itaukei	rural	1	2	0	3	0	0	0	0	0	0	0	Th
23	15-34	f	itaukei	rural	0	1	1	0	0	0	0	0	0	0	0	Th
23	15-34	f	itaukei	rural	0	0	2	2	0	0	0	0	0	0	0	Th
23	15-34	f	itaukei	rural	0	0	2	1	1	0	0	0	0	0	0	Tu
23	15-34	m	itaukei	rural	0	1	1	0	1	0	0	0	0	0	0	Tu
23	15-34	f	itaukei	rural	2	0	1	0	0	0	0	0	0	0	0	Tu
23	15-34	f	itaukei	rural	0	3	3	1	0	0	0	0	0	0	0	Tu
23	15-34	m	itaukei	rural	1	0	2	1	2	0	0	0	0	0	0	Th
23	15-34	f	itaukei	rural	0	1	2	0	0	0	0	0	0	0	1	We
23	15-34	m	itaukei	rural	3	2	7	3	0	0	0	0	0	0	1	Th
23	15-34	f	itaukei	rural	0	0	0	0	0	2	0	8	4	2	0	Fr
23	15-34	f	itaukei	rural	0	2	2	2	0	2	0	0	0	0	0	Mo
23	15-34	f	itaukei	rural	0	0	2	3	3	0	0	0	0	0	0	Tu
23	15-34	f	itaukei	rural	4	3	3	4	2	0	0	0	0	0	0	Th
23	15-34	f	itaukei	rural	0	0	0	0	0	0	2	0	0	0	0	Sa
23	15-34	f	itaukei	rural	1	1	1	0	1	0	0	0	0	0	0	We
23	15-34	f	itaukei	rural	1	0	1	0	0	0	0	0	0	0	0	We
23	15-34	f	itaukei	rural	0	0	0	0	0	1	1	0	1	0	0	We
23	15-34	m	itaukei	rural	0	2	1	0	3	0	0	0	0	0	0	Th
23	15-34	m	itaukei	rural	0	0	1	0	0	0	0	0	0	0	1	Fr
23	15-34	f	itaukei	rural	1	0	4	0	0	0	0	0	0	0	0	Mo
23	15-34	m	itaukei	rural	0	0	2	2	0	0	0	0	0	0	0	Mo
23	15-34	m	itaukei	rural	0	0	15	15	10	0	0	0	0	0	0	Sa
24	15-34	m	itaukei	rural	2	0	2	0	1	0	0	0	0	0	0	Mo
24	15-34	m	itaukei	rural	1	2	4	2	0	0	0	0	0	0	0	We
24	15-34	f	itaukei	rural	2	0	2	0	1	0	0	0	0	0	0	Mo
24	15-34	f	itaukei	rural	0	2	3	1	1	0	0	0	0	0	0	Mo
24	15-34	f	itaukei	rural	0	0	1	0	0	0	0	0	0	0	0	Th
24	15-34	f	itaukei	rural	0	0	0	0	0	0	0	2	2	0	0	Mo
24	15-34	f	itaukei	rural	0	0	15	15	10	0	0	0	0	0	0	Sa
24	15-34	m	itaukei	rural	0	0	0	0	0	0	0	0	0	0	1	Sa
24	15-34	m	itaukei	rural	0	0	15	15	10	0	0	0	0	0	0	Sa
24	15-34	m	itaukei	rural	0	0	1	2	0	0	0	0	0	0	0	We
25	15-34	f	itaukei	rural	4	2	4	0	0	0	0	0	0	0	0	We
25	15-34	f	itaukei	rural	4	1	1	0	2	0	0	0	0	0	0	We
25	15-34	f	itaukei	rural	2	0	3	0	2	0	0	0	0	0	0	Tu
25	15-34	m	itaukei	rural	1	1	1	1	2	0	0	0	0	0	1	Tu
25	15-34	m	itaukei	rural	0	0	1	0	0	0	0	0	0	0	0	Mo
25	15-34	m	itaukei	rural	0	0	0	0	0	0	0	0	0	0	0	Mo
25	15-34	f	itaukei	rural	1	0	3	0	1	0	0	0	0	0	0	Mo
25	15-34	f	itaukei	rural	0	0	0	1	1	0	0	0	0	0	0	Tu
25	15-34	f	itaukei	rural	2	0	0	0	0	0	0	0	0	0	0	Fr
25	15-34	m	itaukei	rural	0	3	6	0	0	0	0	0	0	0	0	Mo
25	15-34	f	itaukei	rural	3	0	2	0	5	0	0	0	0	0	0	Mo
25	15-34	f	itaukei	rural	2	0	1	0	0	0	0	0	0	0	0	Su
25	15-34	m	itaukei	rural	0	0	1	0	0	0	0	0	0	0	0	Th
25	15-34	m	itaukei	rural	0	0	0	0	0	0	0	0	1	0	0	We
25	15-34	f	itaukei	rural	2	0	1	0	0	0	0	0	0	0	0	We
25	15-34	f	itaukei	rural	4	2	15	8	1	0	0	0	0	0	1	Th
25	15-34	m	itaukei	rural	0	0	2	1	0	0	0	0	0	0	0	Mo
25	15-34	m	itaukei	rural	0	1	1	0	0	0	0	0	0	0	0	Mo
25	15-34	m	itaukei	rural	0	0	1	0	0	0	0	0	0	0	1	Sa
25	15-34	f	itaukei	rural	0	0	0	0	0	0	0	0	0	0	1	We
26	15-34	m	itaukei	rural	0	0	1	0	1	0	0	0	0	0	0	We
26	15-34	f	itaukei	rural	0	0	2	2	0	0	0	0	0	0	0	We
26	15-34	f	itaukei	rural	0	1	1	0	0	0	0	0	0	0	0	Tu
26	15-34	f	itaukei	rural	2	0	1	0	0	0	0	0	0	0	0	Tu
26	15-34	f	itaukei	rural	1	2	1	1	0	0	0	0	0	0	0	We
26	15-34	m	itaukei	rural	2	0	1	0	0	0	0	0	0	0	0	Fr
26	15-34	f	itaukei	rural	0	0	2	0	0	0	0	0	0	0	0	Fr
26	15-34	m	itaukei	rural	0	0	1	4	2	0	0	0	0	0	0	Tu
26	15-34	m	itaukei	rural	0	0	0	0	2	0	0	0	0	0	0	Tu
26	15-34	m	itaukei	rural	2	2	4	2	0	0	0	0	0	0	0	We
26	15-34	m	itaukei	rural	1	0	2	1	1	0	0	0	0	0	0	Mo
26	15-34	f	itaukei	rural	0	0	5	5	3	0	0	0	0	0	1	NA
26	15-34	m	itaukei	rural	2	0	1	0	0	0	0	0	0	0	0	Su
26	15-34	m	itaukei	rural	0	0	0	0	0	0	0	0	0	0	1	Tu
26	15-34	f	itaukei	rural	0	0	3	3	0	0	0	0	0	0	1	Th
26	15-34	m	itaukei	rural	0	4	0	2	0	0	0	0	0	0	1	Th
26	15-34	m	itaukei	rural	0	0	4	4	2	0	0	0	0	0	0	Th
26	15-34	m	itaukei	rural	0	0	4	0	0	0	0	0	0	0	1	Th
26	15-34	m	itaukei	rural	0	2	4	0	1	0	0	0	0	0	0	Th
26	15-34	m	itaukei	rural	0	0	1	0	0	0	0	0	0	0	0	Sa
26	15-34	f	itaukei	rural	1	0	3	0	0	0	0	0	0	0	0	We
26	15-34	f	itaukei	rural	0	0	2	2	0	0	0	0	0	0	0	Mo
26	15-34	m	itaukei	rural	2	0	4	0	0	0	0	0	0	0	0	Fr
26	15-34	f	itaukei	rural	0	0	0	0	0	0	0	0	0	0	1	Tu
26	15-34	f	itaukei	rural	0	0	2	0	4	0	0	0	0	0	0	Tu
27	15-34	m	itaukei	rural	0	0	0	2	0	0	0	0	0	0	0	Th
27	15-34	f	itaukei	rural	1	1	1	0	1	0	0	0	0	0	0	Tu
27	15-34	f	itaukei	rural	2	2	2	1	0	0	0	0	0	0	0	Tu
27	15-34	f	itaukei	rural	1	4	0	1	1	0	0	0	0	0	0	Mo
27	15-34	f	itaukei	rural	1	2	2	1	1	0	0	0	0	0	0	Tu
27	15-34	f	itaukei	rural	4	0	1	1	0	0	0	0	0	0	0	Th
27	15-34	m	itaukei	rural	0	0	0	0	0	0	0	0	0	0	NA	We
27	15-34	m	itaukei	rural	0	0	2	1	0	0	0	0	0	0	1	Mo
27	15-34	m	itaukei	rural	0	1	0	0	2	0	0	0	0	0	0	Su
27	15-34	m	itaukei	rural	4	0	2	0	0	0	0	0	0	0	0	NA
27	15-34	f	itaukei	rural	0	0	0	0	0	1	1	1	0	0	0	Mo
27	15-34	f	itaukei	rural	6	0	4	0	2	0	0	0	0	0	0	Th
27	15-34	f	itaukei	rural	2	1	1	0	0	0	0	0	0	0	0	We
27	15-34	f	itaukei	rural	0	0	0	0	0	0	0	1	0	1	0	We
27	15-34	f	itaukei	rural	1	2	1	0	0	0	0	0	0	0	0	Th
27	15-34	f	itaukei	rural	0	2	0	0	1	0	0	0	0	0	0	Fr
27	15-34	m	itaukei	rural	0	3	0	0	0	0	0	0	0	0	0	Mo
28	15-34	m	itaukei	rural	3	4	11	15	0	0	0	0	0	0	1	Th
28	15-34	m	itaukei	rural	0	0	4	0	0	0	0	0	0	0	0	Tu
28	15-34	f	itaukei	rural	1	1	1	0	0	0	0	0	0	0	0	Tu
28	15-34	m	itaukei	rural	0	0	1	0	1	0	0	0	0	0	0	Su
28	15-34	m	itaukei	rural	0	0	0	0	0	0	0	0	0	0	0	Fr
28	15-34	f	itaukei	rural	1	0	0	1	0	0	0	0	0	0	0	We
28	15-34	f	itaukei	rural	4	0	0	2	0	0	0	0	0	0	0	NA
28	15-34	f	itaukei	rural	1	0	2	1	0	0	0	0	0	0	0	Tu
28	15-34	f	itaukei	rural	0	2	1	1	0	0	0	0	0	0	0	Th
28	15-34	m	itaukei	rural	0	2	2	0	0	0	0	0	0	0	1	Th
28	15-34	m	itaukei	rural	0	0	1	1	0	0	0	0	0	0	0	Tu
28	15-34	f	itaukei	rural	1	1	1	1	0	0	0	0	0	0	0	We
28	15-34	m	itaukei	rural	0	0	0	0	0	1	1	0	2	0	0	We
28	15-34	f	itaukei	rural	0	0	0	0	0	0	0	0	0	0	1	We
28	15-34	f	itaukei	rural	2	3	0	0	2	0	0	0	0	0	0	Th
28	15-34	m	itaukei	rural	0	0	0	0	2	0	0	0	0	2	0	Tu
28	15-34	f	itaukei	rural	0	0	0	2	1	0	0	0	0	0	0	Fr
28	15-34	m	itaukei	rural	0	0	2	0	2	0	0	0	0	0	0	Mo
29	15-34	f	itaukei	rural	2	2	6	0	0	0	0	0	0	0	0	Th
29	15-34	f	itaukei	rural	0	0	1	0	0	0	0	0	0	0	0	We
29	15-34	f	itaukei	rural	0	3	0	0	0	0	0	0	0	0	0	Mo
29	15-34	m	itaukei	rural	0	0	0	0	0	0	0	0	0	0	0	Fr
29	15-34	f	itaukei	rural	0	1	1	3	0	0	0	0	0	0	0	Tu
29	15-34	m	itaukei	rural	0	1	0	0	1	0	0	0	0	0	0	Tu
29	15-34	f	itaukei	rural	1	0	0	0	2	0	0	0	0	0	0	We
29	15-34	f	itaukei	rural	0	2	2	1	1	0	0	0	0	0	1	We
29	15-34	f	itaukei	rural	2	1	2	0	1	0	0	0	0	0	0	Mo
29	15-34	f	itaukei	rural	2	2	0	1	0	0	0	0	0	0	0	Tu
29	15-34	m	itaukei	rural	0	0	1	0	0	0	0	0	0	0	0	We
29	15-34	f	itaukei	rural	0	0	0	0	0	1	2	1	0	0	0	We
29	15-34	m	itaukei	rural	2	0	1	0	0	0	0	0	0	0	0	Mo
29	15-34	f	itaukei	rural	0	0	0	0	0	0	2	0	0	0	0	Fr
29	15-34	f	itaukei	rural	0	1	1	1	0	0	0	0	0	0	0	Mo
29	15-34	f	itaukei	rural	1	1	2	3	0	0	0	0	0	0	0	Mo
29	15-34	m	itaukei	rural	0	0	10	0	0	0	0	0	0	0	0	Sa
29	15-34	m	itaukei	rural	2	5	16	15	10	0	0	0	0	0	0	Sa
29	15-34	m	itaukei	rural	0	0	8	0	4	0	0	0	0	0	0	Tu
30	15-34	f	itaukei	rural	1	0	0	1	2	0	0	0	0	0	0	Th
30	15-34	f	itaukei	rural	2	0	1	1	0	0	0	0	0	0	0	Th
30	15-34	f	itaukei	rural	2	0	0	0	0	0	0	0	0	0	0	Mo
30	15-34	f	itaukei	rural	0	0	1	1	2	0	0	0	0	0	1	Fr
30	15-34	f	itaukei	rural	1	2	2	0	0	0	0	0	0	0	0	Mo
30	15-34	f	itaukei	rural	0	1	1	0	1	0	0	0	0	0	1	Mo
30	15-34	f	itaukei	rural	0	1	0	1	2	0	0	0	0	0	0	Mo
30	15-34	f	itaukei	rural	0	0	0	0	0	0	0	0	0	0	0	Tu
30	15-34	f	itaukei	rural	3	0	1	0	0	0	0	0	0	0	0	Th
30	15-34	f	itaukei	rural	6	0	5	1	1	0	0	0	0	0	0	Th
30	15-34	f	itaukei	rural	0	0	0	0	1	0	0	0	0	0	0	Fr
30	15-34	m	itaukei	rural	1	1	4	0	1	0	0	0	0	0	0	We
30	15-34	f	itaukei	rural	3	0	1	3	1	0	0	0	0	0	0	Mo
30	15-34	f	itaukei	rural	0	0	0	0	0	0	0	0	0	0	0	Su
30	15-34	f	itaukei	rural	2	3	2	0	0	0	0	0	0	0	0	Th
30	15-34	f	itaukei	rural	2	0	2	0	0	0	0	0	0	0	0	Sa
30	15-34	m	itaukei	rural	0	0	0	0	0	0	0	0	2	0	1	We
30	15-34	m	itaukei	rural	0	0	0	0	0	0	0	1	0	0	0	We
30	15-34	f	itaukei	rural	0	0	0	0	0	2	0	1	0	1	0	Mo
30	15-34	f	itaukei	rural	0	1	0	2	1	0	0	0	0	0	0	Mo
30	15-34	f	itaukei	rural	0	0	0	0	0	0	2	0	0	1	0	Fr
30	15-34	f	itaukei	rural	0	0	0	0	0	1	3	2	0	0	0	Tu
30	15-34	m	itaukei	rural	0	0	1	0	0	0	0	0	0	0	0	Mo
30	15-34	f	itaukei	rural	1	0	0	0	0	0	0	0	0	0	0	Sa
30	15-34	f	itaukei	rural	2	2	0	0	2	0	0	0	0	0	0	Tu
30	15-34	f	itaukei	rural	0	4	3	0	2	0	0	0	0	0	1	We
31	15-34	m	itaukei	rural	0	0	3	1	0	0	0	0	0	0	0	We
31	15-34	f	itaukei	rural	1	3	1	0	0	0	0	0	0	0	0	Tu
31	15-34	f	itaukei	rural	0	2	0	0	0	0	0	0	0	0	0	Tu
31	15-34	m	itaukei	rural	1	2	2	0	0	0	0	0	0	0	0	Tu
31	15-34	m	itaukei	rural	0	0	0	0	1	0	0	0	0	0	1	We
31	15-34	m	itaukei	rural	0	0	0	0	0	0	1	0	1	0	0	Fr
31	15-34	f	itaukei	rural	1	2	0	1	0	0	0	0	0	0	0	Mo
31	15-34	m	itaukei	rural	0	0	6	0	4	0	0	0	0	0	0	We
31	15-34	m	itaukei	rural	2	1	1	0	0	0	0	0	0	0	0	We
31	15-34	f	itaukei	rural	0	0	0	0	0	0	0	4	4	0	0	Fr
31	15-34	f	itaukei	rural	2	1	2	0	0	0	0	0	0	0	0	Fr
31	15-34	f	itaukei	rural	0	0	0	0	0	0	1	2	0	0	0	Tu
31	15-34	f	itaukei	rural	1	1	1	0	0	0	0	0	0	0	0	Fr
31	15-34	f	itaukei	rural	1	2	0	1	0	0	0	0	0	0	0	Fr
31	15-34	m	itaukei	rural	2	0	7	4	1	0	0	0	0	0	1	Tu
32	15-34	f	itaukei	rural	0	0	3	2	0	0	0	0	0	0	0	Tu
32	15-34	f	itaukei	rural	1	3	0	1	0	0	0	0	0	0	0	Tu
32	15-34	f	itaukei	rural	0	2	0	1	0	0	0	0	0	0	0	We
32	15-34	m	itaukei	rural	0	0	0	2	0	0	0	0	0	0	0	We
32	15-34	f	itaukei	rural	3	2	0	2	0	0	0	0	0	0	1	We
32	15-34	m	itaukei	rural	0	0	0	0	0	0	0	0	0	0	0	Mo
32	15-34	m	itaukei	rural	1	2	1	0	1	0	0	0	0	0	0	Su
32	15-34	f	itaukei	rural	4	2	2	2	0	0	0	0	0	0	0	Th
32	15-34	f	itaukei	rural	1	2	0	1	1	0	0	0	0	0	0	We
32	15-34	f	itaukei	rural	0	0	0	1	0	0	0	0	0	0	0	Sa
33	15-34	f	itaukei	rural	1	1	0	1	0	0	0	0	0	0	0	Th
33	15-34	f	itaukei	rural	1	3	0	1	0	0	0	0	0	0	0	Mo
33	15-34	f	itaukei	rural	4	1	2	0	0	0	0	0	0	0	0	Mo
33	15-34	f	itaukei	rural	1	3	0	1	0	0	0	0	0	0	0	Tu
33	15-34	m	itaukei	rural	1	1	1	1	0	0	0	0	0	0	0	Mo
33	15-34	f	itaukei	rural	0	1	1	0	0	0	0	0	0	0	0	Mo
33	15-34	f	itaukei	rural	2	6	2	0	0	0	0	0	0	0	0	We
33	15-34	f	itaukei	rural	6	10	4	0	0	0	0	0	0	0	0	We
33	15-34	f	itaukei	rural	2	2	1	0	0	0	0	0	0	0	0	Th
33	15-34	m	itaukei	rural	0	0	0	0	0	0	0	0	0	2	0	Sa
33	15-34	m	itaukei	rural	0	0	8	0	0	0	0	0	0	0	1	We
33	15-34	m	itaukei	rural	0	0	0	0	0	0	0	0	0	2	0	We
33	15-34	m	itaukei	rural	2	0	1	0	0	0	0	0	0	0	0	Mo
33	15-34	f	itaukei	rural	0	0	0	0	0	0	2	0	2	1	0	Fr
33	15-34	f	itaukei	rural	0	0	0	1	0	0	0	0	0	0	0	Fr
33	15-34	f	itaukei	rural	3	3	2	0	0	0	0	0	0	0	0	Mo
34	15-34	f	itaukei	rural	0	0	3	1	1	0	0	0	0	0	0	Tu
34	15-34	f	itaukei	rural	0	4	0	1	0	0	0	0	0	0	0	We
34	15-34	m	itaukei	rural	2	0	2	2	2	0	0	0	0	0	0	NA
34	15-34	m	itaukei	rural	0	1	0	0	0	0	1	1	0	0	0	Mo
34	15-34	f	itaukei	rural	1	0	1	1	0	0	0	0	0	0	0	NA
34	15-34	m	itaukei	rural	2	4	2	0	0	0	0	0	0	0	0	NA
34	15-34	f	itaukei	rural	0	0	1	1	1	0	0	0	0	0	0	Su
34	15-34	f	itaukei	rural	1	0	1	1	0	0	0	0	0	0	0	Su
34	15-34	f	itaukei	rural	3	1	5	1	1	0	0	0	0	0	0	Sa
34	15-34	f	itaukei	rural	0	0	0	0	0	2	0	6	0	0	0	Fr
34	15-34	m	itaukei	rural	0	2	2	0	2	0	0	0	0	0	0	Mo
35	35-54	f	itaukei	rural	1	2	0	1	0	0	0	0	0	0	0	Th
35	35-54	m	itaukei	rural	1	8	10	16	0	0	0	0	0	0	0	Th
35	35-54	f	itaukei	rural	0	3	3	2	0	0	0	0	0	0	0	We
35	35-54	m	itaukei	rural	0	0	3	0	1	0	0	0	0	0	0	Tu
35	35-54	f	itaukei	rural	2	0	0	2	2	0	0	0	0	0	0	Tu
35	35-54	f	itaukei	rural	2	5	0	1	1	0	0	0	0	0	0	We
35	35-54	m	itaukei	rural	0	0	2	3	1	0	0	0	0	0	1	Fr
35	35-54	f	itaukei	rural	0	0	0	0	0	0	1	0	2	1	0	Tu
35	35-54	f	itaukei	rural	0	3	4	3	0	0	0	0	0	0	0	Tu
35	35-54	m	itaukei	rural	0	0	2	0	0	0	0	0	0	0	0	Th
35	35-54	f	itaukei	rural	0	0	0	0	0	0	4	0	4	2	0	Fr
35	35-54	f	itaukei	rural	0	1	0	2	1	0	0	0	0	0	0	We
35	35-54	m	itaukei	rural	0	2	10	16	10	0	0	0	0	0	0	Mo
35	35-54	f	itaukei	rural	0	3	0	1	0	0	0	0	0	0	0	Mo
35	35-54	f	itaukei	rural	0	0	2	2	0	0	0	0	0	0	0	Su
35	35-54	m	itaukei	rural	0	0	0	0	0	0	0	0	2	0	0	Sa
35	35-54	f	itaukei	rural	0	1	0	1	0	0	0	0	0	0	0	We
35	35-54	m	itaukei	rural	2	3	1	0	1	0	0	0	0	0	0	We
35	35-54	f	itaukei	rural	1	0	0	1	0	0	0	0	0	0	0	Mo
35	35-54	f	itaukei	rural	0	0	0	11	0	0	0	0	0	0	1	Sa
35	35-54	f	itaukei	rural	0	0	0	1	2	0	0	0	0	0	0	We
36	35-54	f	itaukei	rural	2	2	0	1	0	0	0	0	0	0	0	Th
36	35-54	m	itaukei	rural	3	2	0	6	0	0	0	0	0	0	1	Th
36	35-54	f	itaukei	rural	1	0	0	1	1	0	0	0	0	0	0	Tu
36	35-54	m	itaukei	rural	2	1	0	0	0	0	0	0	0	0	0	Tu
36	35-54	f	itaukei	rural	0	3	1	1	1	0	0	0	0	0	0	Mo
36	35-54	f	itaukei	rural	1	4	0	1	0	0	0	0	0	0	0	Mo
36	35-54	f	itaukei	rural	0	1	0	2	0	0	0	0	0	0	0	Mo
36	35-54	m	itaukei	rural	4	0	2	2	0	0	0	0	0	0	0	Th
36	35-54	f	itaukei	rural	2	1	0	2	0	0	0	0	0	0	0	Mo
36	35-54	m	itaukei	rural	1	3	1	1	1	0	0	0	0	0	0	Mo
36	35-54	f	itaukei	rural	0	1	1	1	0	0	0	0	0	0	0	Mo
36	35-54	f	itaukei	rural	0	0	0	0	0	0	0	0	0	0	0	Mo
36	35-54	m	itaukei	rural	0	0	1	0	0	0	0	0	0	0	0	Tu
36	35-54	f	itaukei	rural	0	2	2	0	1	0	0	0	0	0	0	Th
36	35-54	f	itaukei	rural	1	1	1	0	0	0	0	0	0	0	0	We
36	35-54	m	itaukei	rural	0	0	0	0	0	1	1	0	1	0	0	We
36	35-54	m	itaukei	rural	0	0	1	0	0	0	0	0	0	0	1	Sa
36	35-54	f	itaukei	rural	0	1	1	0	0	0	0	0	0	0	0	We
37	35-54	f	itaukei	rural	0	3	0	1	0	0	0	0	0	0	0	Th
37	35-54	f	itaukei	rural	0	0	0	0	0	0	0	0	0	0	0	Tu
37	35-54	f	itaukei	rural	0	0	0	0	0	0	0	0	0	0	0	Mo
37	35-54	f	itaukei	rural	1	0	0	1	0	0	0	0	0	0	0	Tu
37	35-54	f	itaukei	rural	0	2	0	2	0	0	0	0	0	0	1	Tu
37	35-54	f	itaukei	rural	2	2	2	2	1	0	0	0	0	0	0	Mo
37	35-54	f	itaukei	rural	1	0	0	0	0	1	3	2	0	0	0	Fr
37	35-54	f	itaukei	rural	0	0	0	1	0	0	0	0	0	0	0	Fr
37	35-54	f	itaukei	rural	0	2	1	1	0	0	0	0	0	0	0	Mo
37	35-54	f	itaukei	rural	0	1	4	0	0	0	0	1	0	0	0	Mo
37	35-54	m	itaukei	rural	1	2	2	1	1	0	0	0	0	0	0	Su
37	35-54	f	itaukei	rural	1	3	0	1	0	0	0	0	0	0	0	Th
37	35-54	m	itaukei	rural	1	1	1	0	0	0	0	0	0	0	0	We
37	35-54	f	itaukei	rural	0	1	0	0	2	0	0	0	0	0	0	Tu
37	35-54	m	itaukei	rural	0	0	0	0	0	0	0	0	0	0	1	Sa
37	35-54	f	itaukei	rural	0	10	15	16	10	0	0	0	0	0	0	Sa
37	35-54	f	itaukei	rural	1	3	2	0	2	0	0	0	0	0	0	Tu
38	35-54	m	itaukei	rural	0	2	4	3	0	0	0	0	0	0	1	Th
38	35-54	m	itaukei	rural	0	0	0	0	0	0	1	0	0	0	0	Tu
38	35-54	f	itaukei	rural	2	2	0	1	0	0	0	0	0	0	0	Tu
38	35-54	f	itaukei	rural	0	3	0	1	0	0	0	0	0	0	0	Tu
38	35-54	f	itaukei	rural	0	2	0	1	0	0	0	0	0	0	0	Mo
38	35-54	m	itaukei	rural	0	3	4	1	2	0	0	0	0	0	1	Th
38	35-54	f	itaukei	rural	1	1	0	1	0	0	0	0	0	0	0	Mo
38	35-54	f	itaukei	rural	0	0	0	0	0	0	1	5	2	0	1	Tu
39	35-54	m	itaukei	rural	1	3	1	0	0	0	0	0	0	0	0	Th
39	35-54	f	itaukei	rural	1	1	0	1	1	0	0	0	0	0	0	Tu
39	35-54	f	itaukei	rural	0	0	0	0	0	0	0	0	0	0	0	Fr
39	35-54	f	itaukei	rural	10	6	14	16	13	0	0	0	0	0	1	Fr
39	35-54	m	itaukei	rural	1	3	0	1	0	0	0	0	0	0	0	Tu
39	35-54	m	itaukei	rural	0	0	0	0	0	1	0	0	1	0	0	Tu
39	35-54	f	itaukei	rural	0	1	3	1	1	0	0	0	0	0	0	Tu
39	35-54	f	itaukei	rural	0	0	0	0	0	0	2	2	2	2	0	Fr
39	35-54	f	itaukei	rural	0	1	3	6	2	0	0	0	0	0	0	We
39	35-54	f	itaukei	rural	2	0	0	2	0	0	0	0	0	0	0	We
39	35-54	f	itaukei	rural	0	3	0	1	0	0	0	0	0	0	0	Mo
39	35-54	f	itaukei	rural	0	3	0	1	0	0	0	0	0	0	0	Su
39	35-54	f	itaukei	rural	1	3	0	1	0	0	0	0	0	0	0	We
39	35-54	f	itaukei	rural	0	0	1	0	0	0	0	1	0	0	0	Mo
39	35-54	f	itaukei	rural	1	0	1	2	0	0	0	0	0	0	0	Sa
39	35-54	f	itaukei	rural	1	2	2	2	0	0	0	0	0	0	0	Tu
39	35-54	f	itaukei	rural	2	4	0	1	0	0	0	0	0	0	0	Tu
39	35-54	m	itaukei	rural	0	1	0	0	0	0	0	0	0	0	0	We
40	35-54	f	itaukei	rural	0	0	0	0	0	0	0	1	0	0	0	Mo
40	35-54	f	itaukei	rural	1	1	0	1	0	0	0	0	0	0	1	Tu
40	35-54	m	itaukei	rural	0	0	5	2	0	0	0	0	0	0	1	Th
40	35-54	f	itaukei	rural	0	0	6	2	0	0	0	0	0	0	0	Th
40	35-54	f	itaukei	rural	0	0	0	0	0	0	0	2	4	2	0	Fr
40	35-54	m	itaukei	rural	0	0	0	1	1	0	0	0	0	0	0	Mo
40	35-54	f	itaukei	rural	0	0	0	1	0	0	0	0	0	0	0	Mo
40	35-54	m	itaukei	rural	0	0	2	0	0	0	0	0	0	0	0	Mo
40	35-54	f	itaukei	rural	0	0	0	0	0	0	0	0	0	0	0	Mo
40	35-54	m	itaukei	rural	0	0	0	1	1	0	0	0	0	0	0	Th
40	35-54	m	itaukei	rural	0	0	0	0	0	0	2	1	0	0	0	We
40	35-54	f	itaukei	rural	2	2	2	2	0	0	0	0	0	0	0	Th
40	35-54	f	itaukei	rural	0	0	0	1	1	0	0	0	0	0	0	Mo
40	35-54	m	itaukei	rural	1	0	0	1	0	0	0	0	0	0	1	Sa
40	35-54	f	itaukei	rural	0	0	0	0	0	0	0	0	0	0	0	We
41	35-54	f	itaukei	rural	1	4	0	1	0	0	0	0	0	0	0	Tu
41	35-54	m	itaukei	rural	0	0	0	1	0	0	0	0	0	0	1	Th
41	35-54	f	itaukei	rural	0	0	0	0	0	0	0	1	3	0	1	Tu
42	35-54	f	itaukei	rural	0	0	2	1	0	0	0	0	0	0	0	Th
42	35-54	m	itaukei	rural	0	1	5	6	0	0	0	0	0	0	1	Th
42	35-54	m	itaukei	rural	1	3	0	1	0	0	0	0	0	0	0	Th
42	35-54	m	itaukei	rural	0	4	1	2	0	0	0	0	0	0	0	We
42	35-54	f	itaukei	rural	2	0	0	1	0	0	0	0	0	0	0	Mo
42	35-54	f	itaukei	rural	1	1	2	1	0	0	0	0	0	0	0	Mo
42	35-54	m	itaukei	rural	0	0	0	0	0	0	0	0	0	0	1	Fr
42	35-54	f	itaukei	rural	0	0	0	0	0	0	1	0	1	0	0	Tu
42	35-54	f	itaukei	rural	0	1	2	2	0	0	0	0	0	0	0	Th
42	35-54	m	itaukei	rural	1	2	0	1	2	0	0	0	0	0	0	Th
42	35-54	f	itaukei	rural	0	0	0	0	0	0	0	0	2	0	0	Mo
42	35-54	m	itaukei	rural	0	0	0	0	0	0	0	0	0	0	0	Th
42	35-54	f	itaukei	rural	1	8	0	4	1	0	0	0	0	0	1	We
42	35-54	m	itaukei	rural	1	3	1	2	0	0	0	0	0	0	0	We
42	35-54	f	itaukei	rural	0	0	0	0	0	0	1	1	0	0	0	Fr
42	35-54	m	itaukei	rural	0	2	0	1	0	0	0	0	0	0	0	Fr
42	35-54	m	itaukei	rural	0	0	0	0	0	0	0	0	0	0	0	Fr
42	35-54	m	itaukei	rural	0	1	2	4	2	0	0	0	0	0	1	Tu
42	35-54	m	itaukei	rural	1	0	0	1	1	0	0	0	0	0	0	We
43	35-54	m	itaukei	rural	0	0	0	2	0	0	0	0	0	0	0	Th
43	35-54	m	itaukei	rural	0	10	15	21	0	0	0	0	0	0	1	Th
43	35-54	f	itaukei	rural	0	1	2	1	3	0	0	0	0	0	1	Tu
43	35-54	m	itaukei	rural	1	3	0	1	1	0	0	0	0	0	0	Tu
43	35-54	f	itaukei	rural	1	5	0	0	0	0	0	0	0	0	0	Tu
43	35-54	f	itaukei	rural	0	3	1	0	1	0	0	0	0	0	0	We
43	35-54	f	itaukei	rural	1	0	1	0	1	0	0	0	0	0	0	We
43	35-54	m	itaukei	rural	0	0	0	0	1	0	0	0	0	0	0	We
43	35-54	m	itaukei	rural	0	0	0	0	0	0	0	0	0	0	0	Mo
43	35-54	m	itaukei	rural	0	0	0	0	0	0	0	0	0	0	0	Tu
43	35-54	m	itaukei	rural	1	1	0	1	0	0	0	0	0	0	0	We
43	35-54	f	itaukei	rural	0	2	0	3	1	0	0	0	0	0	0	Mo
43	35-54	m	itaukei	rural	0	0	0	0	0	0	2	1	0	0	0	Mo
43	35-54	m	itaukei	rural	0	0	0	0	0	0	0	0	5	0	0	Mo
43	35-54	m	itaukei	rural	0	0	20	16	5	0	0	0	0	0	1	Sa
44	35-54	m	itaukei	rural	2	6	10	16	0	0	0	0	0	0	0	Th
44	35-54	f	itaukei	rural	0	3	0	1	0	0	0	0	0	0	0	Tu
44	35-54	m	itaukei	rural	0	0	1	0	2	0	0	0	0	0	0	Fr
44	35-54	f	itaukei	rural	1	4	3	6	2	0	0	0	0	0	0	Th
44	35-54	f	itaukei	rural	0	1	0	0	2	0	0	0	0	0	0	Su
44	35-54	m	itaukei	rural	0	0	0	0	0	0	0	0	0	0	0	Tu
44	35-54	m	itaukei	rural	1	2	2	1	0	0	0	0	0	0	0	Tu
44	35-54	m	itaukei	rural	1	0	1	0	0	0	0	0	0	0	0	We
44	35-54	f	itaukei	rural	1	1	0	1	0	0	0	0	0	0	0	We
44	35-54	f	itaukei	rural	0	1	2	1	0	0	0	0	0	0	0	Mo
44	35-54	m	itaukei	rural	0	0	0	2	1	0	0	0	0	0	0	Sa
44	35-54	f	itaukei	rural	0	0	0	1	0	0	0	0	0	0	0	Tu
45	35-54	f	itaukei	rural	2	0	0	0	0	0	0	0	0	0	0	Mo
45	35-54	f	itaukei	rural	0	0	2	1	0	0	0	0	0	0	0	Th
45	35-54	m	itaukei	rural	1	2	0	1	0	0	0	0	0	0	0	Mo
45	35-54	m	itaukei	rural	0	0	0	1	1	0	0	0	0	0	0	Su
45	35-54	m	itaukei	rural	1	0	3	0	0	0	0	0	0	0	0	We
45	35-54	m	itaukei	rural	0	0	0	0	0	0	3	1	0	0	0	Mo
45	35-54	f	itaukei	rural	0	0	0	0	0	0	0	0	0	0	1	Tu
45	35-54	m	itaukei	rural	0	0	0	0	0	0	2	1	1	0	0	Tu
45	35-54	m	itaukei	rural	0	4	2	4	0	0	0	0	0	0	0	Mo
45	35-54	m	itaukei	rural	2	0	0	1	0	0	0	0	0	0	0	Sa
46	35-54	m	itaukei	rural	1	2	0	1	0	0	0	0	0	0	0	Mo
46	35-54	f	itaukei	rural	3	0	0	2	0	0	0	0	0	0	0	We
46	35-54	f	itaukei	rural	0	0	0	0	0	0	0	2	0	1	0	Tu
46	35-54	f	itaukei	rural	0	0	0	0	0	0	0	0	1	0	0	Tu
46	35-54	m	itaukei	rural	0	0	0	0	0	2	0	2	2	0	0	Fr
46	35-54	f	itaukei	rural	0	0	2	5	0	0	0	0	0	0	0	We
46	35-54	m	itaukei	rural	0	0	0	0	0	0	0	0	0	0	0	We
46	35-54	m	itaukei	rural	0	2	0	2	0	0	0	2	0	0	0	NA
46	35-54	f	itaukei	rural	0	2	0	0	0	0	0	0	0	0	0	Tu
46	35-54	f	itaukei	rural	0	2	2	0	0	0	0	0	0	0	0	Th
46	35-54	f	itaukei	rural	0	0	0	0	0	6	0	0	15	0	1	Mo
46	35-54	f	itaukei	rural	1	0	1	2	1	0	0	0	0	0	0	Mo
46	35-54	f	itaukei	rural	0	0	2	0	1	0	0	0	0	0	0	Mo
46	35-54	m	itaukei	rural	0	0	0	0	0	1	1	3	0	0	0	Mo
46	35-54	f	itaukei	rural	0	0	0	0	0	0	0	1	1	0	0	Fr
47	35-54	f	itaukei	rural	0	0	1	1	0	0	0	0	0	0	0	Th
47	35-54	m	itaukei	rural	0	2	0	1	0	0	0	0	0	0	0	Tu
47	35-54	m	itaukei	rural	1	1	1	2	0	0	0	0	0	0	0	Tu
47	35-54	f	itaukei	rural	0	1	3	3	2	0	0	0	0	0	0	Mo
47	35-54	m	itaukei	rural	0	0	2	2	0	0	0	0	0	0	0	Th
47	35-54	m	itaukei	rural	0	0	0	0	0	0	0	0	0	0	0	Mo
47	35-54	m	itaukei	rural	0	3	1	0	0	0	0	0	0	0	0	Mo
47	35-54	f	itaukei	rural	0	3	0	1	0	0	0	0	0	0	0	Su
47	35-54	f	itaukei	rural	2	3	2	4	0	0	0	0	0	0	0	Su
47	35-54	m	itaukei	rural	0	1	1	1	0	0	0	0	0	0	0	Su
47	35-54	f	itaukei	rural	1	0	1	0	0	0	0	0	0	0	0	Tu
47	35-54	m	itaukei	rural	0	0	2	2	0	0	0	0	0	0	0	Th
47	35-54	m	itaukei	rural	0	2	1	0	0	0	0	0	0	0	0	Th
47	35-54	m	itaukei	rural	0	0	0	0	0	3	0	0	1	0	0	Mo
47	35-54	f	itaukei	rural	0	0	0	0	0	0	0	1	0	1	0	Su
47	35-54	f	itaukei	rural	0	0	1	0	0	0	1	1	1	0	0	Tu
47	35-54	m	itaukei	rural	0	0	0	0	0	0	0	2	2	0	0	Tu
48	35-54	m	itaukei	rural	0	0	1	0	1	0	0	0	0	0	0	Th
48	35-54	f	itaukei	rural	0	0	0	0	2	0	0	0	0	0	0	We
48	35-54	m	itaukei	rural	0	0	1	1	0	0	0	0	0	0	1	Fr
48	35-54	f	itaukei	rural	0	0	1	1	2	0	0	0	0	0	0	Tu
48	35-54	m	itaukei	rural	0	0	0	4	3	0	0	0	0	0	0	Fr
48	35-54	f	itaukei	rural	0	0	0	0	0	0	0	0	1	0	0	Fr
48	35-54	m	itaukei	rural	0	0	0	1	0	0	0	0	0	0	1	NA
48	35-54	f	itaukei	rural	0	0	0	2	0	0	0	0	0	0	0	Tu
48	35-54	f	itaukei	rural	0	1	1	0	0	0	0	0	1	0	0	Sa
48	35-54	f	itaukei	rural	0	0	0	0	0	0	0	0	1	1	0	We
48	35-54	f	itaukei	rural	1	0	2	0	1	0	0	0	0	0	0	Mo
49	35-54	f	itaukei	rural	0	0	2	0	1	0	0	0	0	0	1	We
49	35-54	f	itaukei	rural	1	0	0	0	2	0	0	0	0	0	0	Th
49	35-54	m	itaukei	rural	0	4	1	2	0	0	0	0	0	0	0	Fr
49	35-54	f	itaukei	rural	1	0	0	0	0	0	0	0	0	0	0	Fr
49	35-54	m	itaukei	rural	0	2	3	1	0	0	0	0	0	0	0	Tu
49	35-54	m	itaukei	rural	0	0	0	0	0	0	0	0	0	0	1	Th
49	35-54	f	itaukei	rural	0	1	7	0	0	0	0	0	0	0	0	Su
49	35-54	f	itaukei	rural	0	4	0	2	0	0	0	0	0	0	0	NA
49	35-54	f	itaukei	rural	0	0	2	0	0	0	0	0	0	0	0	We
49	35-54	f	itaukei	rural	0	1	1	1	0	0	0	0	0	0	0	Th
49	35-54	f	itaukei	rural	0	0	3	1	1	0	0	0	0	0	0	Th
49	35-54	f	itaukei	rural	0	0	0	0	0	1	0	1	1	0	0	We
49	35-54	f	itaukei	rural	0	0	0	0	0	0	0	1	0	1	0	We
49	35-54	f	itaukei	rural	3	4	4	4	2	0	0	0	0	0	0	Mo
49	35-54	f	itaukei	rural	0	0	0	0	0	0	0	0	0	0	0	Tu
49	35-54	m	itaukei	rural	2	0	2	2	0	0	0	0	0	0	0	Tu
50	35-54	f	itaukei	rural	0	0	1	2	0	0	0	0	0	0	0	Th
50	35-54	m	itaukei	rural	0	0	0	0	0	0	0	0	0	0	0	Th
50	35-54	m	itaukei	rural	0	0	0	0	0	0	0	0	0	0	0	Fr
50	35-54	m	itaukei	rural	1	1	11	2	0	0	0	0	0	0	1	Fr
50	35-54	f	itaukei	rural	0	4	4	3	1	0	0	0	0	0	1	Mo
50	35-54	m	itaukei	rural	0	1	4	0	0	0	0	0	0	0	0	Mo
50	35-54	f	itaukei	rural	0	0	0	0	1	0	0	0	0	2	0	NA
50	35-54	m	itaukei	rural	0	4	3	2	0	0	0	0	0	0	0	Su
50	35-54	f	itaukei	rural	0	0	4	0	0	0	0	0	0	0	0	We
50	35-54	m	itaukei	rural	0	1	5	1	0	0	0	0	0	0	0	Th
50	35-54	m	itaukei	rural	2	0	13	21	7	0	0	0	0	0	0	Th
50	35-54	m	itaukei	rural	0	0	0	0	0	0	0	0	1	0	0	Mo
50	35-54	f	itaukei	rural	0	0	1	0	0	0	0	0	0	0	0	Mo
50	35-54	m	itaukei	rural	2	3	2	1	0	0	0	0	0	0	1	Fr
50	35-54	m	itaukei	rural	0	0	1	1	0	0	0	0	0	0	1	Mo
50	35-54	m	itaukei	rural	1	1	2	2	0	0	0	0	0	0	0	Tu
51	35-54	m	itaukei	rural	1	1	1	0	0	0	0	0	0	0	0	Fr
51	35-54	m	itaukei	rural	0	0	0	1	0	0	0	0	0	0	0	Mo
51	35-54	f	itaukei	rural	1	0	2	0	1	0	0	0	0	0	0	Tu
51	35-54	f	itaukei	rural	0	0	0	0	0	0	0	2	0	1	0	Fr
51	35-54	f	itaukei	rural	0	0	0	1	1	0	0	0	0	0	0	We
51	35-54	m	itaukei	rural	0	0	0	2	0	0	0	0	0	0	1	Th
51	35-54	f	itaukei	rural	0	0	0	0	0	0	0	1	0	0	0	We
51	35-54	f	itaukei	rural	0	0	0	0	0	0	0	1	0	1	0	We
51	35-54	m	itaukei	rural	0	0	0	0	0	0	0	2	2	1	1	We
51	35-54	f	itaukei	rural	0	0	0	0	0	0	0	0	0	0	1	Mo
51	35-54	m	itaukei	rural	0	0	0	1	0	0	0	0	0	0	0	Mo
51	35-54	f	itaukei	rural	0	0	0	0	0	0	0	1	1	0	0	Tu
51	35-54	f	itaukei	rural	0	0	0	0	0	0	0	3	1	2	1	Tu
51	35-54	f	itaukei	rural	0	0	0	0	0	0	0	0	0	0	0	Fr
52	35-54	f	itaukei	rural	1	1	1	0	1	0	0	0	0	0	0	Th
52	35-54	m	itaukei	rural	0	1	2	1	0	0	0	0	0	0	0	Tu
52	35-54	m	itaukei	rural	0	2	0	5	1	0	0	0	0	0	0	Mo
52	35-54	m	itaukei	rural	0	0	1	0	2	0	0	0	0	0	0	We
52	35-54	m	itaukei	rural	0	0	0	1	0	0	0	0	0	0	0	Th
52	35-54	f	itaukei	rural	0	0	0	0	0	0	2	0	0	0	0	Th
52	35-54	m	itaukei	rural	0	0	0	0	0	0	1	4	2	1	0	Fr
52	35-54	m	itaukei	rural	0	0	2	0	2	0	0	0	0	0	0	NA
52	35-54	m	itaukei	rural	0	1	0	1	0	0	0	0	0	0	1	NA
52	35-54	f	itaukei	rural	0	1	0	0	1	0	0	0	0	0	0	Su
52	35-54	m	itaukei	rural	0	0	3	0	4	0	0	0	0	0	0	Tu
52	35-54	f	itaukei	rural	3	2	2	2	0	0	0	0	0	0	1	We
52	35-54	f	itaukei	rural	0	0	0	1	0	0	0	0	0	0	0	Th
52	35-54	f	itaukei	rural	0	0	0	0	0	0	0	0	0	0	0	We
52	35-54	m	itaukei	rural	0	2	1	1	0	0	0	0	0	0	0	We
52	35-54	f	itaukei	rural	0	0	0	0	0	0	0	0	1	0	0	Su
52	35-54	f	itaukei	rural	0	0	0	0	0	0	0	5	1	0	0	Tu
53	35-54	f	itaukei	rural	0	1	2	1	1	0	0	0	0	0	0	Tu
53	35-54	m	itaukei	rural	0	0	4	4	0	0	0	0	0	0	1	Mo
53	35-54	f	itaukei	rural	0	0	3	1	3	0	0	0	0	0	0	Tu
53	35-54	f	itaukei	rural	1	2	1	1	2	0	0	0	0	0	0	Tu
53	35-54	f	itaukei	rural	0	0	0	0	2	0	0	0	0	0	0	We
53	35-54	f	itaukei	rural	1	0	0	0	1	0	0	0	0	0	0	We
53	35-54	m	itaukei	rural	0	0	0	0	1	0	0	0	0	0	0	Th
53	35-54	m	itaukei	rural	0	0	0	0	0	0	0	4	4	0	0	Fr
53	35-54	f	itaukei	rural	0	0	0	0	0	0	0	3	2	0	0	Fr
53	35-54	m	itaukei	rural	0	1	0	1	0	0	0	0	0	0	0	Mo
53	35-54	m	itaukei	rural	1	2	0	1	0	0	0	0	0	0	0	NA
53	35-54	f	itaukei	rural	1	2	1	1	0	0	0	0	0	0	0	Mo
53	35-54	m	itaukei	rural	0	0	0	0	0	0	0	0	0	0	0	Mo
53	35-54	f	itaukei	rural	0	2	0	1	0	0	0	0	0	0	0	Mo
53	35-54	f	itaukei	rural	0	4	0	2	0	0	0	0	0	0	0	We
54	35-54	m	itaukei	rural	0	0	2	1	0	0	0	0	0	0	0	We
54	35-54	m	itaukei	rural	0	0	0	1	0	0	0	0	0	0	0	Tu
54	35-54	f	itaukei	rural	0	1	0	5	5	0	0	0	0	0	0	Tu
54	35-54	m	itaukei	rural	0	0	0	0	2	0	0	0	0	0	0	We
54	35-54	m	itaukei	rural	0	1	0	0	0	0	1	1	2	0	0	Th
54	35-54	f	itaukei	rural	0	0	0	0	0	0	2	0	2	2	0	Fr
54	35-54	m	itaukei	rural	0	1	3	2	0	0	0	0	0	0	0	We
54	35-54	m	itaukei	rural	0	0	2	0	1	0	0	0	0	0	0	Mo
54	35-54	m	itaukei	rural	0	0	0	2	0	0	0	0	0	0	0	Mo
54	35-54	m	itaukei	rural	0	0	0	1	0	0	0	0	0	0	0	Mo
54	35-54	m	itaukei	rural	0	0	0	1	0	0	0	0	0	0	0	Su
54	35-54	f	itaukei	rural	2	0	2	2	0	0	0	0	0	0	0	We
54	35-54	m	itaukei	rural	1	1	0	0	1	0	0	0	0	0	0	Sa
54	35-54	m	itaukei	rural	0	0	0	0	0	0	0	0	1	1	0	Mo
54	35-54	m	itaukei	rural	0	0	0	0	0	0	0	0	0	0	0	Mo
54	35-54	f	itaukei	rural	0	0	0	0	0	1	2	6	1	0	0	Mo
54	35-54	f	itaukei	rural	0	0	2	2	1	0	0	0	0	0	1	Mo
54	35-54	m	itaukei	rural	0	0	1	1	0	0	0	0	0	0	0	Mo
55	55+	f	itaukei	rural	1	0	0	1	1	0	0	0	0	0	0	Mo
55	55+	f	itaukei	rural	1	2	2	0	2	0	0	0	0	1	0	Mo
55	55+	m	itaukei	rural	1	2	2	1	0	0	0	0	0	0	0	Tu
55	55+	m	itaukei	rural	0	1	0	1	0	0	0	0	0	0	0	We
55	55+	m	itaukei	rural	0	0	2	0	0	0	0	0	1	0	0	Th
55	55+	m	itaukei	rural	0	0	0	0	0	0	0	0	0	0	0	We
55	55+	f	itaukei	rural	0	5	0	2	2	0	0	0	0	0	0	Mo
55	55+	m	itaukei	rural	0	0	0	0	1	0	0	0	0	0	0	Mo
55	55+	m	itaukei	rural	0	0	2	1	0	0	0	0	0	0	0	Su
55	55+	m	itaukei	rural	0	0	0	0	0	0	0	0	0	0	0	We
55	55+	m	itaukei	rural	0	0	1	0	0	0	0	4	1	0	0	We
55	55+	m	itaukei	rural	0	1	1	1	1	0	0	0	0	0	0	Mo
56	55+	m	itaukei	rural	1	0	1	1	1	0	0	0	0	0	0	We
56	55+	m	itaukei	rural	0	0	1	0	2	0	0	0	0	0	0	Fr
56	55+	f	itaukei	rural	2	3	1	1	1	0	0	0	0	0	0	Tu
56	55+	m	itaukei	rural	0	2	0	1	2	0	0	0	0	0	0	We
56	55+	m	itaukei	rural	0	0	0	0	0	0	0	0	0	0	1	NA
56	55+	f	itaukei	rural	0	6	0	2	2	0	0	0	0	0	0	NA
56	55+	f	itaukei	rural	4	2	4	0	4	0	0	0	0	0	0	We
56	55+	f	itaukei	rural	0	0	1	1	0	0	0	0	0	0	0	Th
56	55+	f	itaukei	rural	2	2	1	0	1	0	0	0	0	0	0	Mo
56	55+	m	itaukei	rural	0	0	0	1	0	0	0	0	0	0	0	Mo
56	55+	m	itaukei	rural	0	0	2	3	0	0	0	0	0	0	0	Mo
56	55+	f	itaukei	rural	0	0	0	0	0	0	0	3	0	1	0	Fr
56	55+	f	itaukei	rural	0	0	2	3	1	0	0	0	0	0	1	Mo
57	55+	m	itaukei	rural	0	2	1	0	1	0	0	0	0	0	1	Th
57	55+	f	itaukei	rural	1	0	3	0	2	0	0	0	0	0	0	Fr
57	55+	m	itaukei	rural	0	0	0	0	0	0	0	2	0	1	0	Fr
57	55+	m	itaukei	rural	0	1	0	1	0	0	0	0	0	0	0	Su
57	55+	f	itaukei	rural	0	1	1	0	0	0	0	0	0	0	0	Su
57	55+	m	itaukei	rural	0	0	0	1	0	0	0	0	0	0	0	We
57	55+	m	itaukei	rural	0	0	0	0	0	0	1	5	1	0	0	We
57	55+	m	itaukei	rural	0	0	0	0	1	0	0	0	0	0	0	Th
57	55+	f	itaukei	rural	0	0	1	1	0	0	0	0	0	0	0	Mo
57	55+	m	itaukei	rural	2	0	1	0	0	0	0	0	0	0	0	Mo
58	55+	m	itaukei	rural	0	1	0	1	0	0	0	0	0	0	0	We
58	55+	f	itaukei	rural	0	2	0	0	0	0	0	0	0	0	0	Tu
58	55+	m	itaukei	rural	0	0	0	0	0	0	0	0	0	0	0	Fr
58	55+	m	itaukei	rural	0	0	0	2	0	0	0	0	0	0	0	Th
58	55+	m	itaukei	rural	0	0	0	0	0	0	0	0	0	0	0	Su
58	55+	m	itaukei	rural	2	0	5	5	1	0	0	0	0	0	1	We
58	55+	f	itaukei	rural	0	0	0	0	0	0	0	0	0	0	0	Fr
58	55+	m	itaukei	rural	0	0	0	0	1	0	0	0	0	0	0	Mo
59	55+	m	itaukei	rural	0	1	1	0	0	0	0	0	0	0	0	Mo
59	55+	m	itaukei	rural	0	0	0	0	0	0	2	0	1	0	0	Tu
59	55+	m	itaukei	rural	0	2	0	2	0	0	0	0	0	0	0	Th
59	55+	m	itaukei	rural	0	1	0	0	1	0	0	0	0	0	0	Su
59	55+	f	itaukei	rural	0	2	2	0	0	0	0	0	0	0	0	We
59	55+	m	itaukei	rural	0	0	0	0	1	0	0	0	0	0	0	Th
59	55+	f	itaukei	rural	1	1	2	0	0	0	0	0	0	0	0	Th
59	55+	f	itaukei	rural	0	0	0	0	0	0	0	0	0	1	0	We
59	55+	f	itaukei	rural	0	0	0	0	0	0	0	1	0	1	0	We
59	55+	f	itaukei	rural	0	2	0	0	0	0	0	0	0	0	0	Mo
59	55+	m	itaukei	rural	0	0	0	0	0	0	0	0	0	1	0	Tu
59	55+	m	itaukei	rural	0	0	0	0	0	0	0	0	0	0	0	We
60	55+	f	itaukei	rural	0	0	1	0	1	0	0	0	0	0	0	Th
60	55+	m	itaukei	rural	0	2	3	0	2	0	0	0	0	0	0	We
60	55+	m	itaukei	rural	2	3	0	1	0	0	0	0	0	0	0	Tu
60	55+	f	itaukei	rural	1	0	0	0	3	0	0	0	0	0	1	Tu
60	55+	f	itaukei	rural	0	0	1	1	2	0	0	0	0	0	1	Th
60	55+	m	itaukei	rural	0	0	0	0	2	0	0	0	0	0	0	Tu
60	55+	f	itaukei	rural	0	0	0	0	0	0	0	3	0	1	0	Fr
60	55+	m	itaukei	rural	0	1	2	0	1	0	0	0	0	0	0	Su
60	55+	f	itaukei	rural	2	0	0	0	1	0	0	0	0	0	0	Mo
60	55+	m	itaukei	rural	0	1	0	0	1	0	0	0	0	0	0	Tu
60	55+	m	itaukei	rural	0	0	0	0	0	0	0	0	0	0	1	Tu
60	55+	m	itaukei	rural	0	0	0	0	0	0	0	0	3	1	0	We
60	55+	f	itaukei	rural	0	0	0	0	0	0	0	0	0	1	0	We
61	55+	m	itaukei	rural	2	2	2	0	1	0	0	0	0	0	0	We
61	55+	m	itaukei	rural	2	0	2	1	3	0	0	0	0	0	1	Th
61	55+	f	itaukei	rural	0	0	0	0	0	0	3	1	1	1	0	Fr
61	55+	m	itaukei	rural	0	2	3	0	0	0	0	0	0	0	1	NA
61	55+	f	itaukei	rural	0	0	0	0	0	0	0	0	0	1	0	We
61	55+	m	itaukei	rural	0	0	0	0	0	0	0	0	0	0	0	We
61	55+	m	itaukei	rural	2	0	0	0	2	0	0	0	0	0	0	Th
61	55+	m	itaukei	rural	0	3	0	0	1	0	0	0	0	0	1	Th
61	55+	f	itaukei	rural	0	1	2	0	1	0	0	0	0	0	0	Mo
61	55+	m	itaukei	rural	0	0	0	1	1	0	0	0	0	0	0	Mo
61	55+	m	itaukei	rural	0	0	0	0	0	0	0	0	0	0	0	Fr
61	55+	m	itaukei	rural	2	0	2	0	4	0	0	0	0	0	0	Tu
62	55+	f	itaukei	rural	0	0	0	0	0	0	0	0	0	0	0	We
62	55+	m	itaukei	rural	0	0	0	0	0	0	0	0	2	0	0	Fr
62	55+	f	itaukei	rural	0	1	4	2	1	0	0	0	0	0	1	Mo
62	55+	m	itaukei	rural	0	0	0	0	0	0	0	0	0	0	0	Mo
62	55+	f	itaukei	rural	2	3	1	1	1	0	0	0	0	0	1	We
62	55+	m	itaukei	rural	0	0	0	0	0	0	0	0	2	0	0	We
62	55+	m	itaukei	rural	0	3	0	1	0	0	0	0	0	0	1	Th
62	55+	f	itaukei	rural	0	0	0	0	1	0	0	0	0	0	0	Sa
63	55+	f	itaukei	rural	1	0	0	0	1	0	0	0	0	0	0	Th
63	55+	m	itaukei	rural	2	1	0	1	0	0	0	0	0	0	0	Th
63	55+	m	itaukei	rural	0	1	2	1	1	0	0	0	0	0	0	Tu
63	55+	m	itaukei	rural	0	1	0	1	0	0	0	0	0	0	0	Tu
63	55+	f	itaukei	rural	0	0	0	0	0	0	0	0	0	0	0	Tu
63	55+	f	itaukei	rural	0	0	0	1	1	0	0	0	0	0	0	Tu
63	55+	m	itaukei	rural	6	5	2	0	2	0	0	0	0	0	1	Fr
63	55+	m	itaukei	rural	0	0	0	0	0	0	0	0	0	0	NA	Tu
63	55+	m	itaukei	rural	0	0	0	0	0	0	0	0	0	1	0	We
63	55+	m	itaukei	rural	0	0	0	0	0	0	0	2	0	2	0	Tu
64	55+	f	itaukei	rural	0	0	0	2	1	0	0	0	0	0	0	Th
64	55+	f	itaukei	rural	0	0	1	0	0	0	0	0	0	0	0	We
64	55+	m	itaukei	rural	0	0	0	0	1	0	0	0	0	0	0	Th
64	55+	m	itaukei	rural	0	0	0	0	0	0	0	0	0	0	0	Fr
64	55+	f	itaukei	rural	0	0	0	0	0	0	0	0	0	0	0	NA
64	55+	m	itaukei	rural	1	3	0	1	0	0	0	0	0	0	0	Sa
64	55+	f	itaukei	rural	0	1	0	0	4	0	0	0	0	0	0	Th
64	55+	m	itaukei	rural	0	0	2	1	0	0	0	0	0	0	1	Fr
64	55+	f	itaukei	rural	1	1	0	2	1	0	0	0	0	0	0	We
65	55+	m	itaukei	rural	0	0	0	0	0	0	0	0	0	0	0	Tu
65	55+	m	itaukei	rural	0	2	0	1	2	0	0	0	0	0	0	Tu
65	55+	f	itaukei	rural	0	0	1	3	1	0	0	0	0	0	0	Tu
65	55+	f	itaukei	rural	0	0	0	0	0	0	0	0	0	3	0	Fr
65	55+	f	itaukei	rural	2	2	0	0	1	0	0	0	0	0	0	NA
65	55+	m	itaukei	rural	1	3	1	1	1	0	0	0	0	0	0	Su
65	55+	f	itaukei	rural	0	0	1	1	0	0	0	0	0	0	0	We
65	55+	f	itaukei	rural	1	0	1	0	1	0	0	0	0	0	0	Th
65	55+	m	itaukei	rural	0	0	0	0	0	0	0	0	0	0	0	We
65	55+	f	itaukei	rural	0	0	0	0	0	0	0	0	0	1	0	Fr
65	55+	f	itaukei	rural	0	0	0	0	0	0	0	1	0	1	0	Tu
65	55+	m	itaukei	rural	0	0	1	0	1	0	0	0	0	0	1	Sa
65	55+	f	itaukei	rural	2	0	2	0	2	0	0	0	0	0	0	Tu
65	55+	m	itaukei	rural	0	6	10	10	0	0	0	0	0	0	0	Tu
65	55+	f	itaukei	rural	0	0	2	0	2	0	0	0	0	0	0	We
66	55+	m	itaukei	rural	0	0	0	1	0	0	0	0	0	0	0	Mo
66	55+	m	itaukei	rural	0	0	0	0	1	0	0	0	0	0	1	Tu
66	55+	m	itaukei	rural	0	0	0	0	0	0	0	0	0	0	0	We
66	55+	f	itaukei	rural	0	0	1	0	1	0	0	0	0	0	0	Fr
66	55+	m	itaukei	rural	0	0	0	0	0	0	0	0	0	0	1	Tu
66	55+	m	itaukei	rural	2	0	0	0	2	0	0	0	0	0	0	Th
66	55+	f	itaukei	rural	0	0	0	0	0	0	0	0	0	0	0	Th
67	55+	f	itaukei	rural	1	1	3	1	2	0	0	0	0	0	0	We
67	55+	f	itaukei	rural	0	0	0	0	2	0	0	0	0	0	0	Tu
67	55+	f	itaukei	rural	0	0	0	0	1	0	0	0	0	0	0	Fr
67	55+	f	itaukei	rural	0	0	0	9	9	0	0	0	0	0	0	Tu
67	55+	m	itaukei	rural	0	0	1	0	0	0	0	0	0	0	0	Tu
67	55+	m	itaukei	rural	0	0	2	0	0	0	0	0	0	0	0	We
67	55+	m	itaukei	rural	1	0	3	2	1	0	0	0	0	0	1	Th
67	55+	m	itaukei	rural	0	0	0	0	0	0	0	1	0	1	0	Tu
68	55+	m	itaukei	rural	0	0	0	0	0	0	0	0	0	0	0	Th
68	55+	m	itaukei	rural	0	2	0	0	0	0	0	0	0	0	0	Tu
68	55+	f	itaukei	rural	0	0	0	1	0	0	0	0	0	0	0	Tu
68	55+	f	itaukei	rural	0	0	0	0	0	0	0	2	2	0	0	Fr
68	55+	m	itaukei	rural	1	1	1	1	1	0	0	0	0	0	0	Mo
68	55+	f	itaukei	rural	2	3	4	3	1	0	0	0	0	0	1	We
68	55+	f	itaukei	rural	1	0	1	1	0	0	0	0	0	0	0	Mo
69	55+	m	itaukei	rural	1	3	1	3	2	0	0	0	0	0	1	We
69	55+	m	itaukei	rural	0	0	0	0	0	0	0	0	0	1	0	Fr
69	55+	m	itaukei	rural	0	3	2	2	2	0	0	0	0	0	0	Mo
69	55+	m	itaukei	rural	0	2	2	1	0	0	0	0	0	0	0	Mo
70	55+	m	itaukei	rural	0	0	0	0	0	0	0	0	0	0	0	Mo
71	55+	f	itaukei	rural	0	0	1	1	0	0	0	0	0	0	0	Th
71	55+	f	itaukei	rural	0	0	0	0	0	0	0	0	0	0	0	Fr
71	55+	m	itaukei	rural	0	1	1	1	1	0	0	0	0	0	0	Mo
71	55+	f	itaukei	rural	0	0	1	0	0	0	0	0	0	0	0	Tu
71	55+	m	itaukei	rural	0	0	0	0	1	0	0	0	0	0	0	Fr
71	55+	m	itaukei	rural	0	0	4	0	2	0	0	0	0	0	0	Th
71	55+	m	itaukei	rural	0	1	0	2	0	0	0	0	0	0	0	Mo
72	55+	m	itaukei	rural	0	0	1	1	2	0	0	0	0	0	0	Th
72	55+	m	itaukei	rural	0	1	1	0	4	0	0	0	0	0	0	Th
72	55+	f	itaukei	rural	0	1	1	0	0	0	0	0	0	0	0	Tu
72	55+	f	itaukei	rural	0	0	0	0	0	0	0	1	2	0	0	Fr
72	55+	m	itaukei	rural	0	0	4	1	2	0	0	0	0	0	0	We
72	55+	m	itaukei	rural	0	1	0	1	0	0	0	0	0	0	0	Mo
72	55+	m	itaukei	rural	0	0	0	0	0	0	0	0	0	0	0	We
72	55+	f	itaukei	rural	0	0	0	0	0	0	0	0	0	0	0	Tu
73	55+	m	itaukei	rural	0	0	0	0	0	0	0	0	0	0	0	Th
73	55+	f	itaukei	rural	1	1	2	1	0	0	0	0	0	0	0	Mo
73	55+	f	itaukei	rural	0	0	0	1	1	0	0	0	0	0	0	Tu
73	55+	f	itaukei	rural	0	0	0	0	1	0	0	0	0	0	0	Tu
73	55+	f	itaukei	rural	0	0	0	2	1	0	0	0	0	0	0	We
74	55+	m	itaukei	rural	0	3	0	2	0	0	0	0	0	0	0	Th
74	55+	f	itaukei	rural	0	0	0	0	1	0	0	0	0	0	0	Mo
74	55+	f	itaukei	rural	0	0	1	1	0	0	0	0	0	0	0	Th
74	55+	m	itaukei	rural	4	2	4	4	0	0	0	0	0	0	0	Th
74	55+	m	itaukei	rural	0	0	3	0	2	0	0	0	0	0	0	Tu
75	55+	f	itaukei	rural	0	0	0	0	1	0	0	0	0	0	0	Tu
75	55+	f	itaukei	rural	0	2	0	0	0	0	0	0	0	0	0	Th
75	55+	f	itaukei	rural	0	0	0	0	0	2	0	4	2	4	0	Fr
75	55+	f	itaukei	rural	2	0	1	2	0	0	0	1	0	0	0	NA
75	55+	f	itaukei	rural	2	6	2	2	2	0	0	0	0	0	0	We
75	55+	m	itaukei	rural	0	0	0	0	1	0	0	0	0	0	0	Mo
76	55+	f	itaukei	rural	3	7	10	12	1	0	0	0	0	0	1	Th
76	55+	m	itaukei	rural	0	4	2	0	1	0	0	0	0	0	0	We
76	55+	m	itaukei	rural	2	6	0	2	0	0	0	0	0	0	0	NA
76	55+	f	itaukei	rural	1	3	0	2	0	0	0	0	0	0	0	We
77	55+	m	itaukei	rural	0	0	0	2	1	0	0	0	0	0	0	Th
77	55+	m	itaukei	rural	0	0	0	0	0	0	0	0	1	0	0	We
77	55+	m	itaukei	rural	0	0	0	0	0	0	0	4	2	4	0	Fr
78	55+	f	itaukei	rural	5	4	8	7	6	0	0	0	0	0	1	Th
78	55+	m	itaukei	rural	0	0	0	1	1	0	0	0	0	0	0	Tu
78	55+	f	itaukei	rural	0	1	2	2	0	0	0	0	0	0	0	Su
78	55+	f	itaukei	rural	0	3	2	2	0	0	0	0	0	0	0	We
79	55+	m	itaukei	rural	6	7	10	13	10	0	0	0	0	0	0	Fr
80	55+	m	itaukei	rural	0	0	1	0	1	0	0	0	0	0	0	Tu
80	55+	m	itaukei	rural	0	0	0	0	2	0	0	0	0	0	0	Th
81	55+	m	itaukei	rural	0	0	0	0	0	0	0	0	0	0	0	Fr
83	55+	m	itaukei	rural	0	0	1	1	0	0	0	0	0	0	0	Th
90	55+	m	itaukei	rural	0	0	0	0	0	0	0	0	0	0	0	Su
21	15-34	f	itaukei	NA	0	0	0	0	0	1	0	0	1	0	0	Fr
30	15-34	m	itaukei	NA	0	0	0	0	0	1	1	7	2	0	1	Fr
33	15-34	m	itaukei	NA	0	0	0	0	0	2	0	2	0	0	0	Fr
38	35-54	f	itaukei	NA	0	0	0	0	0	1	1	1	2	2	1	NA
41	35-54	m	itaukei	NA	0	0	0	0	0	4	4	0	4	2	0	Fr
44	35-54	m	itaukei	NA	0	0	0	0	0	0	0	2	4	4	0	Su

## Sheet: animals
eth	geog	chicken	cows	goats	pigs	sheep	cats	dogs	horses	mongooses	rats
iTaukei	Peri-urban	1	1	1	1	1	1	1	1	1	1
iTaukei	Urban	1	1	1	1	1	1	1	1	1	1
other	Rural	1	1	1	1	1	1	0	1	1	1
iTaukei	Rural	1	1	1	1	1	0	1	1	1	1
iTaukei	Rural	1	1	1	1	1	0	1	1	1	1
iTaukei	Peri-urban	1	1	1	1	1	0	1	1	1	1
iTaukei	Peri-urban	1	1	1	1	1	0	1	1	1	1
iTaukei	Peri-urban	1	1	1	1	1	0	1	1	1	1
iTaukei	Rural	1	1	1	1	1	0	0	1	1	1
iTaukei	Rural	1	1	1	1	1	0	0	1	1	1
iTaukei	Rural	1	1	1	1	1	0	0	1	1	1
iTaukei	Peri-urban	1	1	1	1	1	0	0	1	1	1
iTaukei	Rural	1	1	1	1	1	0	0	1	0	1
iTaukei	Rural	1	1	1	1	1	0	0	0	1	1
iTaukei	Rural	1	1	1	1	0	1	1	1	1	1
iTaukei	Peri-urban	1	1	1	1	0	1	1	1	1	1
iTaukei	Urban	1	1	1	1	0	1	1	1	1	1
iTaukei	Rural	1	1	1	1	0	1	1	1	1	1
iTaukei	Rural	1	1	1	1	0	1	1	1	1	1
iTaukei	Rural	1	1	1	1	0	1	1	1	1	1
iTaukei	Urban	1	1	1	1	0	1	1	0	0	1
iTaukei	Urban	1	1	1	1	0	1	0	1	1	1
iTaukei	Urban	1	1	1	1	0	1	0	1	1	1
iTaukei	Urban	1	1	1	1	0	1	0	1	1	1
iTaukei	Urban	1	1	1	1	0	1	0	1	0	1
iTaukei	Rural	1	1	1	1	0	1	0	0	1	1
iTaukei	Rural	1	1	1	1	0	0	1	1	1	1
iTaukei	Rural	1	1	1	1	0	0	1	1	1	1
iTaukei	Peri-urban	1	1	1	1	0	0	1	1	1	1
iTaukei	Urban	1	1	1	1	0	0	1	1	1	1
iTaukei	Urban	1	1	1	1	0	0	1	1	1	1
iTaukei	Urban	1	1	1	1	0	0	1	1	1	1
iTaukei	Urban	1	1	1	1	0	0	1	1	1	1
iTaukei	Urban	1	1	1	1	0	0	1	1	1	1
iTaukei	Rural	1	1	1	1	0	0	1	1	1	1
iTaukei	Rural	1	1	1	1	0	0	1	1	1	1
iTaukei	Rural	1	1	1	1	0	0	1	1	1	1
iTaukei	Rural	1	1	1	1	0	0	1	1	1	1
iTaukei	Rural	1	1	1	1	0	0	1	1	1	1
iTaukei	Urban	1	1	1	1	0	0	1	1	1	1
iTaukei	Urban	1	1	1	1	0	0	1	1	1	1
iTaukei	Urban	1	1	1	1	0	0	1	1	1	1
iTaukei	Rural	1	1	1	1	0	0	1	1	1	1
iTaukei	Rural	1	1	1	1	0	0	1	1	1	1
iTaukei	Urban	1	1	1	1	0	0	1	1	1	1
iTaukei	Urban	1	1	1	1	0	0	1	1	1	1
iTaukei	Rural	1	1	1	1	0	0	1	1	1	1
iTaukei	Rural	1	1	1	1	0	0	1	1	0	1
iTaukei	Rural	1	1	1	1	0	0	1	0	1	1
iTaukei	Rural	1	1	1	1	0	0	0	1	1	1
iTaukei	Urban	1	1	1	1	0	0	0	1	1	1
iTaukei	Urban	1	1	1	1	0	0	0	1	1	1
iTaukei	Urban	1	1	1	1	0	0	0	1	1	1
iTaukei	Peri-urban	1	1	1	1	0	0	0	1	1	1
iTaukei	Peri-urban	1	1	1	1	0	0	0	1	1	1
iTaukei	Rural	1	1	1	1	0	0	0	1	1	1
iTaukei	Rural	1	1	1	1	0	0	0	1	1	1
iTaukei	Rural	1	1	1	1	0	0	0	1	1	1
iTaukei	Urban	1	1	1	1	0	0	0	1	1	1
iTaukei	Urban	1	1	1	1	0	0	0	1	1	1
iTaukei	Rural	1	1	1	1	0	0	0	1	1	1
iTaukei	Rural	1	1	1	1	0	0	0	1	1	1
iTaukei	Rural	1	1	1	1	0	0	0	1	1	1
iTaukei	Urban	1	1	1	1	0	0	0	1	1	1
iTaukei	Urban	1	1	1	1	0	0	0	1	1	1
iTaukei	Rural	1	1	1	1	0	0	0	1	1	1
iTaukei	Urban	1	1	1	1	0	0	0	1	1	0
iTaukei	Urban	1	1	1	1	0	0	0	1	0	1
iTaukei	Rural	1	1	1	1	0	0	0	1	0	1
other	Urban	1	1	1	1	0	0	0	1	0	1
other	Urban	1	1	1	1	0	0	0	1	0	0
other	Peri-urban	1	1	1	1	0	0	0	0	1	1
iTaukei	Rural	1	1	1	1	0	0	0	0	1	1
iTaukei	Rural	1	1	1	1	0	0	0	0	1	1
iTaukei	Rural	1	1	1	1	0	0	0	0	1	1
iTaukei	Rural	1	1	1	1	0	0	0	0	1	1
iTaukei	Rural	1	1	1	1	0	0	0	0	1	1
iTaukei	Rural	1	1	1	1	0	0	0	0	1	1
iTaukei	Rural	1	1	1	1	0	0	0	0	0	1
iTaukei	Rural	1	1	1	0	1	1	0	1	1	1
iTaukei	Peri-urban	1	1	1	0	1	0	1	1	1	1
iTaukei	Peri-urban	1	1	1	0	1	0	1	1	1	1
iTaukei	Peri-urban	1	1	1	0	1	0	1	1	1	1
other	Rural	1	1	1	0	1	0	1	0	0	1
iTaukei	Peri-urban	1	1	1	0	1	0	0	1	1	1
other	Rural	1	1	1	0	1	0	0	0	1	1
other	Rural	1	1	1	0	0	1	1	1	1	1
other	Rural	1	1	1	0	0	1	1	1	1	1
other	Rural	1	1	1	0	0	1	1	1	1	1
iTaukei	Peri-urban	1	1	1	0	0	1	1	1	1	1
iTaukei	Rural	1	1	1	0	0	1	1	1	1	1
other	Rural	1	1	1	0	0	1	1	1	1	1
other	Rural	1	1	1	0	0	1	1	1	1	1
other	Rural	1	1	1	0	0	1	1	1	1	0
other	Rural	1	1	1	0	0	1	1	1	1	0
iTaukei	Rural	1	1	1	0	0	1	1	1	0	0
other	Rural	1	1	1	0	0	1	1	1	0	0
iTaukei	Rural	1	1	1	0	0	1	1	0	1	1
other	Rural	1	1	1	0	0	1	1	0	1	1
other	Rural	1	1	1	0	0	1	1	0	1	1
other	Rural	1	1	1	0	0	1	1	0	1	1
other	Rural	1	1	1	0	0	1	1	0	1	1
other	Rural	1	1	1	0	0	1	1	0	1	1
other	Peri-urban	1	1	1	0	0	1	1	0	1	1
other	Rural	1	1	1	0	0	1	1	0	0	0
other	Rural	1	1	1	0	0	1	1	0	0	0
other	Rural	1	1	1	0	0	0	1	1	1	1
other	Rural	1	1	1	0	0	0	1	1	1	1
iTaukei	Rural	1	1	1	0	0	0	1	1	1	1
other	Rural	1	1	1	0	0	0	1	1	1	1
other	Rural	1	1	1	0	0	0	1	0	1	1
other	Rural	1	1	1	0	0	0	1	0	1	1
other	Peri-urban	1	1	1	0	0	0	1	0	1	1
iTaukei	Peri-urban	1	1	1	0	0	0	1	0	1	1
other	Peri-urban	1	1	1	0	0	0	1	0	1	1
other	Rural	1	1	1	0	0	0	0	0	1	1
other	Rural	1	1	1	0	0	0	0	0	1	1
other	Rural	1	1	1	0	0	0	0	0	1	1
other	Rural	1	1	1	0	0	0	0	0	1	1
other	Rural	1	1	1	0	0	0	0	0	1	1
other	Rural	1	1	1	0	0	0	0	0	1	1
other	Rural	1	1	1	0	0	0	0	0	1	1
other	Rural	1	1	1	0	0	0	0	0	1	1
other	Rural	1	1	1	0	0	0	0	0	1	1
other	Peri-urban	1	1	1	0	0	0	0	0	1	1
iTaukei	Rural	1	1	0	1	0	1	1	1	1	1
iTaukei	Rural	1	1	0	1	0	1	1	1	1	1
iTaukei	Rural	1	1	0	1	0	1	1	1	1	1
iTaukei	Rural	1	1	0	1	0	1	1	1	1	1
iTaukei	Rural	1	1	0	1	0	1	1	1	1	1
iTaukei	Rural	1	1	0	1	0	1	1	1	1	1
iTaukei	Rural	1	1	0	1	0	1	1	1	1	0
iTaukei	Rural	1	1	0	1	0	1	1	1	0	1
other	Peri-urban	1	1	0	1	0	1	1	0	1	1
iTaukei	Rural	1	1	0	1	0	1	1	0	1	1
iTaukei	Rural	1	1	0	1	0	1	1	0	1	1
iTaukei	Rural	1	1	0	1	0	1	1	0	1	1
other	Rural	1	1	0	1	0	1	1	0	1	1
iTaukei	Rural	1	1	0	1	0	1	1	0	1	1
other	Rural	1	1	0	1	0	1	1	0	1	0
other	Rural	1	1	0	1	0	1	1	0	1	0
iTaukei	Rural	1	1	0	1	0	1	1	0	1	0
iTaukei	Rural	1	1	0	1	0	1	1	0	0	1
iTaukei	Rural	1	1	0	1	0	1	0	1	1	1
iTaukei	Rural	1	1	0	1	0	1	0	1	1	1
iTaukei	Rural	1	1	0	1	0	1	0	1	1	1
iTaukei	Rural	1	1	0	1	0	1	0	1	1	1
iTaukei	Rural	1	1	0	1	0	1	0	1	1	0
iTaukei	Rural	1	1	0	1	0	1	0	1	0	1
iTaukei	Rural	1	1	0	1	0	1	0	1	0	1
other	Peri-urban	1	1	0	1	0	1	0	0	1	1
iTaukei	Rural	1	1	0	1	0	1	0	0	1	1
iTaukei	Rural	1	1	0	1	0	1	0	0	1	1
iTaukei	Peri-urban	1	1	0	1	0	1	0	0	1	1
iTaukei	Rural	1	1	0	1	0	1	0	0	1	1
iTaukei	Rural	1	1	0	1	0	1	0	0	1	0
iTaukei	Rural	1	1	0	1	0	0	1	1	1	1
iTaukei	Rural	1	1	0	1	0	0	1	1	1	1
iTaukei	Rural	1	1	0	1	0	0	1	1	1	1
iTaukei	Rural	1	1	0	1	0	0	1	1	1	1
iTaukei	Rural	1	1	0	1	0	0	1	1	1	1
iTaukei	Rural	1	1	0	1	0	0	1	1	1	1
iTaukei	Rural	1	1	0	1	0	0	1	1	1	1
iTaukei	Rural	1	1	0	1	0	0	1	1	1	1
iTaukei	Rural	1	1	0	1	0	0	1	1	1	1
iTaukei	Rural	1	1	0	1	0	0	1	1	1	1
iTaukei	Rural	1	1	0	1	0	0	1	1	1	1
iTaukei	Rural	1	1	0	1	0	0	1	1	1	1
iTaukei	Rural	1	1	0	1	0	0	1	1	1	1
iTaukei	Rural	1	1	0	1	0	0	1	1	1	1
iTaukei	Rural	1	1	0	1	0	0	1	1	1	1
iTaukei	Rural	1	1	0	1	0	0	1	1	1	1
iTaukei	Rural	1	1	0	1	0	0	1	1	1	1
iTaukei	Rural	1	1	0	1	0	0	1	1	1	1
iTaukei	Rural	1	1	0	1	0	0	1	1	1	1
iTaukei	Rural	1	1	0	1	0	0	1	1	0	1
iTaukei	Rural	1	1	0	1	0	0	1	1	0	1
other	Peri-urban	1	1	0	1	0	0	1	0	1	1
iTaukei	Rural	1	1	0	1	0	0	1	0	1	1
iTaukei	Rural	1	1	0	1	0	0	1	0	1	1
iTaukei	Rural	1	1	0	1	0	0	1	0	1	1
iTaukei	Rural	1	1	0	1	0	0	1	0	1	1
iTaukei	Rural	1	1	0	1	0	0	1	0	1	1
iTaukei	Rural	1	1	0	1	0	0	1	0	1	1
iTaukei	Rural	1	1	0	1	0	0	1	0	1	1
iTaukei	Rural	1	1	0	1	0	0	1	0	1	1
iTaukei	Rural	1	1	0	1	0	0	1	0	1	1
iTaukei	Peri-urban	1	1	0	1	0	0	1	0	1	1
iTaukei	Rural	1	1	0	1	0	0	1	0	1	1
other	Rural	1	1	0	1	0	0	1	0	1	1
iTaukei	Rural	1	1	0	1	0	0	1	0	1	1
iTaukei	Rural	1	1	0	1	0	0	1	0	1	1
iTaukei	Rural	1	1	0	1	0	0	1	0	1	1
iTaukei	Rural	1	1	0	1	0	0	1	0	1	1
iTaukei	Rural	1	1	0	1	0	0	1	0	1	1
iTaukei	Rural	1	1	0	1	0	0	1	0	1	1
iTaukei	Rural	1	1	0	1	0	0	1	0	1	1
iTaukei	Rural	1	1	0	1	0	0	1	0	1	1
iTaukei	Rural	1	1	0	1	0	0	1	0	1	1
iTaukei	Rural	1	1	0	1	0	0	1	0	1	1
iTaukei	Rural	1	1	0	1	0	0	1	0	1	0
iTaukei	Rural	1	1	0	1	0	0	1	0	1	0
iTaukei	Rural	1	1	0	1	0	0	0	1	1	1
iTaukei	Rural	1	1	0	1	0	0	0	1	1	1
iTaukei	Rural	1	1	0	1	0	0	0	1	1	1
iTaukei	Rural	1	1	0	1	0	0	0	1	1	1
iTaukei	Rural	1	1	0	1	0	0	0	1	1	1
iTaukei	Rural	1	1	0	1	0	0	0	1	1	1
iTaukei	Rural	1	1	0	1	0	0	0	1	1	1
iTaukei	Rural	1	1	0	1	0	0	0	1	1	1
iTaukei	Rural	1	1	0	1	0	0	0	1	1	1
iTaukei	Rural	1	1	0	1	0	0	0	1	1	1
iTaukei	Rural	1	1	0	1	0	0	0	1	1	1
iTaukei	Rural	1	1	0	1	0	0	0	1	1	1
iTaukei	Rural	1	1	0	1	0	0	0	1	1	1
other	Rural	1	1	0	1	0	0	0	1	1	1
iTaukei	Rural	1	1	0	1	0	0	0	1	1	1
iTaukei	Rural	1	1	0	1	0	0	0	1	1	1
iTaukei	Rural	1	1	0	1	0	0	0	1	1	1
iTaukei	Rural	1	1	0	1	0	0	0	1	1	1
iTaukei	Peri-urban	1	1	0	1	0	0	0	1	1	1
iTaukei	Rural	1	1	0	1	0	0	0	1	1	1
iTaukei	Rural	1	1	0	1	0	0	0	1	1	1
iTaukei	Urban	1	1	0	1	0	0	0	1	1	1
iTaukei	Rural	1	1	0	1	0	0	0	1	1	1
iTaukei	Urban	1	1	0	1	0	0	0	1	1	1
iTaukei	Rural	1	1	0	1	0	0	0	1	0	1
iTaukei	Rural	1	1	0	1	0	0	0	1	0	1
iTaukei	Rural	1	1	0	1	0	0	0	1	0	1
iTaukei	Rural	1	1	0	1	0	0	0	1	0	1
iTaukei	Rural	1	1	0	1	0	0	0	1	0	1
iTaukei	Rural	1	1	0	1	0	0	0	1	0	1
iTaukei	Rural	1	1	0	1	0	0	0	1	0	1
iTaukei	Urban	1	1	0	1	0	0	0	0	1	1
other	Peri-urban	1	1	0	1	0	0	0	0	1	1
other	Peri-urban	1	1	0	1	0	0	0	0	1	1
iTaukei	Rural	1	1	0	1	0	0	0	0	1	1
iTaukei	Rural	1	1	0	1	0	0	0	0	1	1
iTaukei	Rural	1	1	0	1	0	0	0	0	1	1
iTaukei	Rural	1	1	0	1	0	0	0	0	1	1
iTaukei	Rural	1	1	0	1	0	0	0	0	1	1
iTaukei	Rural	1	1	0	1	0	0	0	0	1	1
iTaukei	Rural	1	1	0	1	0	0	0	0	1	1
iTaukei	Rural	1	1	0	1	0	0	0	0	1	1
iTaukei	Rural	1	1	0	1	0	0	0	0	1	1
iTaukei	Rural	1	1	0	1	0	0	0	0	1	1
iTaukei	Rural	1	1	0	1	0	0	0	0	1	1
iTaukei	Rural	1	1	0	1	0	0	0	0	1	1
other	Rural	1	1	0	1	0	0	0	0	1	1
iTaukei	Rural	1	1	0	1	0	0	0	0	1	1
iTaukei	Rural	1	1	0	1	0	0	0	0	1	1
iTaukei	Peri-urban	1	1	0	1	0	0	0	0	1	1
iTaukei	Rural	1	1	0	1	0	0	0	0	1	1
iTaukei	Peri-urban	1	1	0	1	0	0	0	0	1	1
iTaukei	Rural	1	1	0	1	0	0	0	0	1	1
iTaukei	Rural	1	1	0	1	0	0	0	0	1	1
iTaukei	Rural	1	1	0	1	0	0	0	0	1	1
iTaukei	Rural	1	1	0	1	0	0	0	0	1	1
iTaukei	Rural	1	1	0	1	0	0	0	0	1	1
iTaukei	Rural	1	1	0	1	0	0	0	0	1	1
iTaukei	Rural	1	1	0	1	0	0	0	0	1	1
iTaukei	Rural	1	1	0	1	0	0	0	0	1	1
iTaukei	Rural	1	1	0	1	0	0	0	0	1	1
iTaukei	Rural	1	1	0	1	0	0	0	0	1	1
iTaukei	Rural	1	1	0	1	0	0	0	0	1	1
iTaukei	Rural	1	1	0	1	0	0	0	0	1	1
iTaukei	Rural	1	1	0	1	0	0	0	0	1	1
iTaukei	Rural	1	1	0	1	0	0	0	0	1	1
iTaukei	Rural	1	1	0	1	0	0	0	0	1	1
iTaukei	Rural	1	1	0	1	0	0	0	0	1	1
iTaukei	Rural	1	1	0	1	0	0	0	0	1	1
iTaukei	Rural	1	1	0	1	0	0	0	0	1	1
iTaukei	Rural	1	1	0	1	0	0	0	0	1	1
iTaukei	Rural	1	1	0	1	0	0	0	0	1	1
iTaukei	Rural	1	1	0	1	0	0	0	0	1	1
iTaukei	Rural	1	1	0	1	0	0	0	0	1	1
iTaukei	Urban	1	1	0	1	0	0	0	0	1	1
iTaukei	Rural	1	1	0	1	0	0	0	0	1	1
iTaukei	Rural	1	1	0	1	0	0	0	0	1	1
iTaukei	Urban	1	1	0	1	0	0	0	0	1	1
iTaukei	Rural	1	1	0	1	0	0	0	0	1	1
other	Peri-urban	1	1	0	1	0	0	0	0	1	0
iTaukei	Rural	1	1	0	1	0	0	0	0	1	0
iTaukei	Rural	1	1	0	1	0	0	0	0	1	0
iTaukei	Rural	1	1	0	1	0	0	0	0	1	0
iTaukei	Rural	1	1	0	1	0	0	0	0	1	0
iTaukei	Rural	1	1	0	1	0	0	0	0	0	1
other	Rural	1	1	0	0	0	1	1	1	1	1
other	Rural	1	1	0	0	0	1	1	1	1	1
iTaukei	Peri-urban	1	1	0	0	0	1	1	1	1	1
other	Rural	1	1	0	0	0	1	1	1	1	1
iTaukei	Rural	1	1	0	0	0	1	1	1	1	1
other	Rural	1	1	0	0	0	1	1	0	1	1
iTaukei	Rural	1	1	0	0	0	1	1	0	1	1
iTaukei	Rural	1	1	0	0	0	1	1	0	1	1
other	Rural	1	1	0	0	0	1	1	0	1	0
iTaukei	Rural	1	1	0	0	0	1	1	0	0	0
other	Rural	1	1	0	0	0	1	0	0	1	1
other	Rural	1	1	0	0	0	0	1	1	1	1
other	Rural	1	1	0	0	0	0	1	1	1	1
other	Rural	1	1	0	0	0	0	1	1	1	1
iTaukei	Rural	1	1	0	0	0	0	1	1	1	1
iTaukei	Rural	1	1	0	0	0	0	1	1	1	1
iTaukei	Rural	1	1	0	0	0	0	1	1	1	0
iTaukei	Rural	1	1	0	0	0	0	1	0	1	1
other	Rural	1	1	0	0	0	0	1	0	1	1
other	Rural	1	1	0	0	0	0	1	0	1	1
other	Rural	1	1	0	0	0	0	1	0	1	1
iTaukei	Rural	1	1	0	0	0	0	1	0	1	1
iTaukei	Rural	1	1	0	0	0	0	1	0	1	1
other	Rural	1	1	0	0	0	0	1	0	1	1
other	Peri-urban	1	1	0	0	0	0	1	0	1	1
other	Peri-urban	1	1	0	0	0	0	1	0	1	1
iTaukei	Rural	1	1	0	0	0	0	1	0	1	1
iTaukei	Urban	1	1	0	0	0	0	0	1	1	1
iTaukei	Rural	1	1	0	0	0	0	0	1	1	1
iTaukei	Rural	1	1	0	0	0	0	0	1	1	1
iTaukei	Rural	1	1	0	0	0	0	0	1	1	1
iTaukei	Rural	1	1	0	0	0	0	0	1	1	1
iTaukei	Rural	1	1	0	0	0	0	0	1	1	1
other	Rural	1	1	0	0	0	0	0	1	1	1
iTaukei	Rural	1	1	0	0	0	0	0	1	1	1
iTaukei	Rural	1	1	0	0	0	0	0	1	1	1
iTaukei	Urban	1	1	0	0	0	0	0	1	0	1
iTaukei	Rural	1	1	0	0	0	0	0	0	1	1
iTaukei	Rural	1	1	0	0	0	0	0	0	1	1
other	Rural	1	1	0	0	0	0	0	0	1	1
iTaukei	Rural	1	1	0	0	0	0	0	0	1	1
iTaukei	Urban	1	1	0	0	0	0	0	0	1	1
iTaukei	Rural	1	1	0	0	0	0	0	0	1	1
iTaukei	Rural	1	1	0	0	0	0	0	0	1	1
other	Rural	1	1	0	0	0	0	0	0	1	1
iTaukei	Rural	1	1	0	0	0	0	0	0	1	1
iTaukei	Rural	1	1	0	0	0	0	0	0	1	1
iTaukei	Rural	1	1	0	0	0	0	0	0	1	1
iTaukei	Rural	1	1	0	0	0	0	0	0	1	1
iTaukei	Rural	1	1	0	0	0	0	0	0	1	1
other	Rural	1	1	0	0	0	0	0	0	1	0
other	Rural	1	1	0	0	0	0	0	0	1	0
iTaukei	Rural	1	1	0	0	0	0	0	0	1	0
iTaukei	Rural	1	1	0	0	0	0	0	0	0	1
other	Peri-urban	1	1	0	0	0	0	0	0	0	1
iTaukei	Peri-urban	1	1	0	0	0	0	0	0	0	0
iTaukei	Rural	1	1	0	0	0	0	0	0	0	0
iTaukei	Peri-urban	1	0	1	1	1	0	0	0	0	1
other	Rural	1	0	1	1	0	1	1	0	1	1
iTaukei	Rural	1	0	1	1	0	0	0	0	1	1
other	Peri-urban	1	0	1	1	0	0	0	0	0	1
other	Rural	1	0	1	0	1	1	1	0	1	1
other	Peri-urban	1	0	1	0	1	1	1	0	0	1
other	Rural	1	0	1	0	1	0	1	0	1	1
other	Rural	1	0	1	0	0	1	1	0	1	1
other	Rural	1	0	1	0	0	1	1	0	1	1
other	Rural	1	0	1	0	0	1	1	0	1	1
other	Rural	1	0	1	0	0	1	1	0	0	1
other	Peri-urban	1	0	1	0	0	1	0	0	1	1
other	Rural	1	0	1	0	0	0	1	1	1	1
other	Rural	1	0	1	0	0	0	1	0	1	1
other	Rural	1	0	1	0	0	0	1	0	1	1
other	Rural	1	0	1	0	0	0	1	0	1	1
other	Rural	1	0	1	0	0	0	1	0	1	1
other	Peri-urban	1	0	1	0	0	0	1	0	1	1
other	Rural	1	0	1	0	0	0	1	0	0	0
other	Rural	1	0	1	0	0	0	0	1	0	1
iTaukei	Rural	1	0	1	0	0	0	0	0	1	1
other	Rural	1	0	1	0	0	0	0	0	1	1
other	Rural	1	0	1	0	0	0	0	0	1	1
other	Rural	1	0	1	0	0	0	0	0	1	1
iTaukei	Peri-urban	1	0	1	0	0	0	0	0	1	1
other	Rural	1	0	1	0	0	0	0	0	1	1
other	Rural	1	0	1	0	0	0	0	0	1	1
other	Rural	1	0	1	0	0	0	0	0	1	1
other	Peri-urban	1	0	1	0	0	0	0	0	1	1
other	Rural	1	0	1	0	0	0	0	0	0	0
iTaukei	Rural	1	0	0	1	1	0	0	0	1	1
iTaukei	Rural	1	0	0	1	1	0	0	0	0	1
iTaukei	Rural	1	0	0	1	0	1	1	1	0	1
iTaukei	Rural	1	0	0	1	0	1	1	1	0	1
iTaukei	Rural	1	0	0	1	0	1	1	1	0	1
iTaukei	Peri-urban	1	0	0	1	0	1	1	0	1	1
other	Peri-urban	1	0	0	1	0	1	1	0	1	1
iTaukei	Peri-urban	1	0	0	1	0	1	1	0	1	1
iTaukei	Peri-urban	1	0	0	1	0	1	1	0	1	1
iTaukei	Rural	1	0	0	1	0	1	1	0	1	1
iTaukei	Rural	1	0	0	1	0	1	1	0	1	1
iTaukei	Peri-urban	1	0	0	1	0	1	1	0	1	1
iTaukei	Rural	1	0	0	1	0	1	1	0	1	1
iTaukei	Peri-urban	1	0	0	1	0	1	1	0	1	1
iTaukei	Rural	1	0	0	1	0	1	1	0	1	1
iTaukei	Rural	1	0	0	1	0	1	1	0	1	1
iTaukei	Peri-urban	1	0	0	1	0	1	1	0	0	1
iTaukei	Rural	1	0	0	1	0	1	1	0	0	1
iTaukei	Rural	1	0	0	1	0	1	1	0	0	1
iTaukei	Rural	1	0	0	1	0	1	1	0	0	1
iTaukei	Rural	1	0	0	1	0	1	1	0	0	1
iTaukei	Rural	1	0	0	1	0	1	1	0	0	1
iTaukei	Rural	1	0	0	1	0	1	1	0	0	1
iTaukei	Rural	1	0	0	1	0	1	1	0	0	0
iTaukei	Peri-urban	1	0	0	1	0	1	1	0	0	0
iTaukei	Rural	1	0	0	1	0	1	1	0	0	0
iTaukei	Rural	1	0	0	1	0	1	0	1	1	1
iTaukei	Rural	1	0	0	1	0	1	0	1	1	1
iTaukei	Rural	1	0	0	1	0	1	0	1	0	1
iTaukei	Rural	1	0	0	1	0	1	0	1	0	1
iTaukei	Rural	1	0	0	1	0	1	0	1	0	0
iTaukei	Peri-urban	1	0	0	1	0	1	0	0	1	1
iTaukei	Peri-urban	1	0	0	1	0	1	0	0	1	1
iTaukei	Peri-urban	1	0	0	1	0	1	0	0	1	1
iTaukei	Peri-urban	1	0	0	1	0	1	0	0	1	1
iTaukei	Urban	1	0	0	1	0	1	0	0	1	1
iTaukei	Urban	1	0	0	1	0	1	0	0	1	1
iTaukei	Urban	1	0	0	1	0	1	0	0	1	1
iTaukei	Rural	1	0	0	1	0	1	0	0	1	1
iTaukei	Rural	1	0	0	1	0	1	0	0	1	1
iTaukei	Rural	1	0	0	1	0	1	0	0	1	1
iTaukei	Rural	1	0	0	1	0	1	0	0	1	1
iTaukei	Urban	1	0	0	1	0	1	0	0	1	1
iTaukei	Urban	1	0	0	1	0	1	0	0	1	0
iTaukei	Rural	1	0	0	1	0	1	0	0	0	1
iTaukei	Rural	1	0	0	1	0	1	0	0	0	1
iTaukei	Rural	1	0	0	1	0	1	0	0	0	1
iTaukei	Rural	1	0	0	1	0	1	0	0	0	1
iTaukei	Rural	1	0	0	1	0	1	0	0	0	1
iTaukei	Rural	1	0	0	1	0	1	0	0	0	1
iTaukei	Rural	1	0	0	1	0	1	0	0	0	1
iTaukei	Rural	1	0	0	1	0	1	0	0	0	0
iTaukei	Rural	1	0	0	1	0	0	1	1	1	1
iTaukei	Rural	1	0	0	1	0	0	1	1	1	1
iTaukei	Rural	1	0	0	1	0	0	1	1	0	1
iTaukei	Peri-urban	1	0	0	1	0	0	1	0	1	1
iTaukei	Peri-urban	1	0	0	1	0	0	1	0	1	1
iTaukei	Urban	1	0	0	1	0	0	1	0	1	1
iTaukei	Peri-urban	1	0	0	1	0	0	1	0	1	1
iTaukei	Rural	1	0	0	1	0	0	1	0	1	1
iTaukei	Rural	1	0	0	1	0	0	1	0	1	1
iTaukei	Rural	1	0	0	1	0	0	1	0	1	1
iTaukei	Rural	1	0	0	1	0	0	1	0	1	1
iTaukei	Rural	1	0	0	1	0	0	1	0	1	1
iTaukei	Rural	1	0	0	1	0	0	1	0	1	1
iTaukei	Rural	1	0	0	1	0	0	1	0	1	1
iTaukei	Urban	1	0	0	1	0	0	1	0	1	1
iTaukei	Urban	1	0	0	1	0	0	1	0	1	1
iTaukei	Urban	1	0	0	1	0	0	1	0	1	1
iTaukei	Rural	1	0	0	1	0	0	1	0	1	1
iTaukei	Rural	1	0	0	1	0	0	1	0	1	1
iTaukei	Rural	1	0	0	1	0	0	1	0	1	1
iTaukei	Rural	1	0	0	1	0	0	1	0	1	1
iTaukei	Rural	1	0	0	1	0	0	1	0	1	0
iTaukei	Rural	1	0	0	1	0	0	1	0	0	1
iTaukei	Rural	1	0	0	1	0	0	1	0	0	1
iTaukei	Rural	1	0	0	1	0	0	1	0	0	1
iTaukei	Rural	1	0	0	1	0	0	1	0	0	1
iTaukei	Rural	1	0	0	1	0	0	1	0	0	1
iTaukei	Rural	1	0	0	1	0	0	1	0	0	1
iTaukei	Rural	1	0	0	1	0	0	1	0	0	1
iTaukei	Rural	1	0	0	1	0	0	1	0	0	1
iTaukei	Rural	1	0	0	1	0	0	1	0	0	1
iTaukei	Rural	1	0	0	1	0	0	1	0	0	1
iTaukei	Rural	1	0	0	1	0	0	1	0	0	1
iTaukei	Rural	1	0	0	1	0	0	1	0	0	0
iTaukei	Rural	1	0	0	1	0	0	1	0	0	0
iTaukei	Rural	1	0	0	1	0	0	0	1	1	1
iTaukei	Rural	1	0	0	1	0	0	0	1	1	1
iTaukei	Rural	1	0	0	1	0	0	0	1	1	1
iTaukei	Rural	1	0	0	1	0	0	0	1	1	1
iTaukei	Rural	1	0	0	1	0	0	0	1	1	1
iTaukei	Peri-urban	1	0	0	1	0	0	0	1	1	1
iTaukei	Rural	1	0	0	1	0	0	0	1	0	1
iTaukei	Rural	1	0	0	1	0	0	0	1	0	1
iTaukei	Rural	1	0	0	1	0	0	0	1	0	1
iTaukei	Rural	1	0	0	1	0	0	0	1	0	1
iTaukei	Rural	1	0	0	1	0	0	0	1	0	1
iTaukei	Rural	1	0	0	1	0	0	0	1	0	1
iTaukei	Rural	1	0	0	1	0	0	0	1	0	1
iTaukei	Rural	1	0	0	1	0	0	0	1	0	1
iTaukei	Rural	1	0	0	1	0	0	0	1	0	1
iTaukei	Peri-urban	1	0	0	1	0	0	0	0	1	1
iTaukei	Peri-urban	1	0	0	1	0	0	0	0	1	1
iTaukei	Urban	1	0	0	1	0	0	0	0	1	1
iTaukei	Urban	1	0	0	1	0	0	0	0	1	1
iTaukei	Urban	1	0	0	1	0	0	0	0	1	1
iTaukei	Urban	1	0	0	1	0	0	0	0	1	1
iTaukei	Urban	1	0	0	1	0	0	0	0	1	1
iTaukei	Urban	1	0	0	1	0	0	0	0	1	1
iTaukei	Urban	1	0	0	1	0	0	0	0	1	1
iTaukei	Peri-urban	1	0	0	1	0	0	0	0	1	1
iTaukei	Rural	1	0	0	1	0	0	0	0	1	1
iTaukei	Rural	1	0	0	1	0	0	0	0	1	1
iTaukei	Rural	1	0	0	1	0	0	0	0	1	1
iTaukei	Rural	1	0	0	1	0	0	0	0	1	1
iTaukei	Rural	1	0	0	1	0	0	0	0	1	1
iTaukei	Rural	1	0	0	1	0	0	0	0	1	1
iTaukei	Rural	1	0	0	1	0	0	0	0	1	1
iTaukei	Rural	1	0	0	1	0	0	0	0	1	1
iTaukei	Rural	1	0	0	1	0	0	0	0	1	1
iTaukei	Rural	1	0	0	1	0	0	0	0	1	1
iTaukei	Rural	1	0	0	1	0	0	0	0	1	1
iTaukei	Rural	1	0	0	1	0	0	0	0	1	1
iTaukei	Rural	1	0	0	1	0	0	0	0	1	1
iTaukei	Rural	1	0	0	1	0	0	0	0	1	1
iTaukei	Rural	1	0	0	1	0	0	0	0	1	1
iTaukei	Rural	1	0	0	1	0	0	0	0	1	1
iTaukei	Rural	1	0	0	1	0	0	0	0	1	1
iTaukei	Rural	1	0	0	1	0	0	0	0	1	1
iTaukei	Rural	1	0	0	1	0	0	0	0	1	1
iTaukei	Rural	1	0	0	1	0	0	0	0	1	1
iTaukei	Rural	1	0	0	1	0	0	0	0	1	1
iTaukei	Rural	1	0	0	1	0	0	0	0	1	1
iTaukei	Rural	1	0	0	1	0	0	0	0	1	1
iTaukei	Rural	1	0	0	1	0	0	0	0	1	1
iTaukei	Rural	1	0	0	1	0	0	0	0	1	1
iTaukei	Rural	1	0	0	1	0	0	0	0	1	1
iTaukei	Rural	1	0	0	1	0	0	0	0	1	1
iTaukei	Peri-urban	1	0	0	1	0	0	0	0	1	1
iTaukei	Peri-urban	1	0	0	1	0	0	0	0	1	1
iTaukei	Peri-urban	1	0	0	1	0	0	0	0	1	1
iTaukei	Peri-urban	1	0	0	1	0	0	0	0	1	1
iTaukei	Peri-urban	1	0	0	1	0	0	0	0	1	1
iTaukei	Peri-urban	1	0	0	1	0	0	0	0	1	1
iTaukei	Peri-urban	1	0	0	1	0	0	0	0	1	1
iTaukei	Peri-urban	1	0	0	1	0	0	0	0	1	1
iTaukei	Peri-urban	1	0	0	1	0	0	0	0	1	1
iTaukei	Rural	1	0	0	1	0	0	0	0	1	1
iTaukei	Rural	1	0	0	1	0	0	0	0	1	1
iTaukei	Rural	1	0	0	1	0	0	0	0	1	1
iTaukei	Rural	1	0	0	1	0	0	0	0	1	1
iTaukei	Urban	1	0	0	1	0	0	0	0	1	1
iTaukei	Urban	1	0	0	1	0	0	0	0	1	1
iTaukei	Urban	1	0	0	1	0	0	0	0	1	1
iTaukei	Urban	1	0	0	1	0	0	0	0	1	1
iTaukei	Urban	1	0	0	1	0	0	0	0	1	1
iTaukei	Urban	1	0	0	1	0	0	0	0	1	1
iTaukei	Urban	1	0	0	1	0	0	0	0	1	1
iTaukei	Urban	1	0	0	1	0	0	0	0	1	0
iTaukei	Rural	1	0	0	1	0	0	0	0	1	0
iTaukei	Rural	1	0	0	1	0	0	0	0	1	0
iTaukei	Rural	1	0	0	1	0	0	0	0	1	0
iTaukei	Rural	1	0	0	1	0	0	0	0	1	0
iTaukei	Rural	1	0	0	1	0	0	0	0	0	1
iTaukei	Rural	1	0	0	1	0	0	0	0	0	1
iTaukei	Rural	1	0	0	1	0	0	0	0	0	1
iTaukei	Rural	1	0	0	1	0	0	0	0	0	1
iTaukei	Rural	1	0	0	1	0	0	0	0	0	1
iTaukei	Rural	1	0	0	1	0	0	0	0	0	1
iTaukei	Rural	1	0	0	1	0	0	0	0	0	1
iTaukei	Rural	1	0	0	1	0	0	0	0	0	1
iTaukei	Rural	1	0	0	1	0	0	0	0	0	1
iTaukei	Rural	1	0	0	1	0	0	0	0	0	1
iTaukei	Rural	1	0	0	1	0	0	0	0	0	1
iTaukei	Rural	1	0	0	1	0	0	0	0	0	1
iTaukei	Rural	1	0	0	1	0	0	0	0	0	1
iTaukei	Rural	1	0	0	1	0	0	0	0	0	1
iTaukei	Rural	1	0	0	1	0	0	0	0	0	1
iTaukei	Rural	1	0	0	1	0	0	0	0	0	1
iTaukei	Rural	1	0	0	1	0	0	0	0	0	1
iTaukei	Rural	1	0	0	1	0	0	0	0	0	1
iTaukei	Rural	1	0	0	1	0	0	0	0	0	1
iTaukei	Rural	1	0	0	1	0	0	0	0	0	1
iTaukei	Rural	1	0	0	1	0	0	0	0	0	1
iTaukei	Rural	1	0	0	1	0	0	0	0	0	1
iTaukei	Rural	1	0	0	1	0	0	0	0	0	1
iTaukei	Rural	1	0	0	1	0	0	0	0	0	1
iTaukei	Rural	1	0	0	1	0	0	0	0	0	1
iTaukei	Rural	1	0	0	1	0	0	0	0	0	1
iTaukei	Rural	1	0	0	1	0	0	0	0	0	1
iTaukei	Rural	1	0	0	1	0	0	0	0	0	1
iTaukei	Rural	1	0	0	1	0	0	0	0	0	1
iTaukei	Rural	1	0	0	1	0	0	0	0	0	1
iTaukei	Rural	1	0	0	1	0	0	0	0	0	1
iTaukei	Rural	1	0	0	1	0	0	0	0	0	1
iTaukei	Rural	1	0	0	1	0	0	0	0	0	1
iTaukei	Rural	1	0	0	1	0	0	0	0	0	1
iTaukei	Rural	1	0	0	1	0	0	0	0	0	1
iTaukei	Rural	1	0	0	1	0	0	0	0	0	1
iTaukei	Rural	1	0	0	1	0	0	0	0	0	1
iTaukei	Rural	1	0	0	1	0	0	0	0	0	1
iTaukei	Rural	1	0	0	1	0	0	0	0	0	1
iTaukei	Rural	1	0	0	1	0	0	0	0	0	1
iTaukei	Rural	1	0	0	1	0	0	0	0	0	1
iTaukei	Rural	1	0	0	1	0	0	0	0	0	1
iTaukei	Rural	1	0	0	1	0	0	0	0	0	1
iTaukei	Rural	1	0	0	1	0	0	0	0	0	1
other	Rural	1	0	0	1	0	0	0	0	0	1
iTaukei	Rural	1	0	0	1	0	0	0	0	0	1
iTaukei	Rural	1	0	0	1	0	0	0	0	0	1
iTaukei	Rural	1	0	0	1	0	0	0	0	0	1
iTaukei	Rural	1	0	0	1	0	0	0	0	0	1
iTaukei	Rural	1	0	0	1	0	0	0	0	0	1
iTaukei	Rural	1	0	0	1	0	0	0	0	0	1
iTaukei	Rural	1	0	0	1	0	0	0	0	0	1
iTaukei	Rural	1	0	0	1	0	0	0	0	0	0
iTaukei	Rural	1	0	0	1	0	0	0	0	0	0
iTaukei	Rural	1	0	0	1	0	0	0	0	0	0
iTaukei	Rural	1	0	0	1	0	0	0	0	0	0
other	Rural	1	0	0	0	1	0	0	1	1	1
other	Rural	1	0	0	0	0	1	1	1	1	1
other	Rural	1	0	0	0	0	1	1	1	0	0
iTaukei	Rural	1	0	0	0	0	1	1	0	1	1
iTaukei	Rural	1	0	0	0	0	1	1	0	1	1
other	Rural	1	0	0	0	0	1	1	0	1	1
other	Rural	1	0	0	0	0	1	1	0	1	1
other	Rural	1	0	0	0	0	1	1	0	1	1
other	Peri-urban	1	0	0	0	0	1	1	0	1	1
other	Peri-urban	1	0	0	0	0	1	1	0	1	1
other	Peri-urban	1	0	0	0	0	1	1	0	1	1
other	Peri-urban	1	0	0	0	0	1	1	0	1	1
iTaukei	Rural	1	0	0	0	0	1	1	0	1	1
other	Peri-urban	1	0	0	0	0	1	1	0	1	1
iTaukei	Rural	1	0	0	0	0	1	1	0	1	1
other	Peri-urban	1	0	0	0	0	1	1	0	1	0
iTaukei	Peri-urban	1	0	0	0	0	1	1	0	1	0
iTaukei	Peri-urban	1	0	0	0	0	1	1	0	0	1
other	Peri-urban	1	0	0	0	0	1	1	0	0	1
other	Rural	1	0	0	0	0	1	1	0	0	1
iTaukei	Rural	1	0	0	0	0	1	1	0	0	1
other	Rural	1	0	0	0	0	1	1	0	0	1
iTaukei	Rural	1	0	0	0	0	1	1	0	0	0
other	Urban	1	0	0	0	0	1	1	0	0	0
other	Peri-urban	1	0	0	0	0	1	1	0	0	0
iTaukei	Rural	1	0	0	0	0	1	0	1	0	1
other	Rural	1	0	0	0	0	1	0	1	0	0
iTaukei	Rural	1	0	0	0	0	1	0	0	1	1
iTaukei	Urban	1	0	0	0	0	1	0	0	1	1
iTaukei	Urban	1	0	0	0	0	1	0	0	1	1
other	Rural	1	0	0	0	0	1	0	0	1	1
iTaukei	Rural	1	0	0	0	0	1	0	0	1	1
iTaukei	Peri-urban	1	0	0	0	0	1	0	0	1	1
other	Rural	1	0	0	0	0	1	0	0	0	1
iTaukei	Rural	1	0	0	0	0	1	0	0	0	1
other	Rural	1	0	0	0	0	1	0	0	0	1
iTaukei	Rural	1	0	0	0	0	1	0	0	0	1
iTaukei	Rural	1	0	0	0	0	1	0	0	0	0
iTaukei	Rural	1	0	0	0	0	1	0	0	0	0
iTaukei	Urban	1	0	0	0	0	0	1	0	1	1
iTaukei	Peri-urban	1	0	0	0	0	0	1	0	1	1
iTaukei	Rural	1	0	0	0	0	0	1	0	1	1
iTaukei	Rural	1	0	0	0	0	0	1	0	1	1
iTaukei	Rural	1	0	0	0	0	0	1	0	1	1
other	Rural	1	0	0	0	0	0	1	0	1	1
other	Rural	1	0	0	0	0	0	1	0	1	1
other	Rural	1	0	0	0	0	0	1	0	1	1
other	Rural	1	0	0	0	0	0	1	0	1	1
iTaukei	Rural	1	0	0	0	0	0	1	0	1	1
iTaukei	Rural	1	0	0	0	0	0	1	0	1	1
other	Rural	1	0	0	0	0	0	1	0	1	1
iTaukei	Urban	1	0	0	0	0	0	1	0	1	1
iTaukei	Rural	1	0	0	0	0	0	1	0	1	1
other	Rural	1	0	0	0	0	0	1	0	1	1
other	Rural	1	0	0	0	0	0	1	0	1	1
other	Rural	1	0	0	0	0	0	1	0	1	1
other	Rural	1	0	0	0	0	0	1	0	1	1
other	Rural	1	0	0	0	0	0	1	0	1	1
other	Rural	1	0	0	0	0	0	1	0	1	1
other	Urban	1	0	0	0	0	0	1	0	1	1
other	Urban	1	0	0	0	0	0	1	0	1	1
other	Urban	1	0	0	0	0	0	1	0	1	1
other	Peri-urban	1	0	0	0	0	0	1	0	1	1
other	Peri-urban	1	0	0	0	0	0	1	0	1	1
other	Peri-urban	1	0	0	0	0	0	1	0	1	1
other	Peri-urban	1	0	0	0	0	0	1	0	1	1
iTaukei	Rural	1	0	0	0	0	0	1	0	1	1
iTaukei	Rural	1	0	0	0	0	0	1	0	1	1
iTaukei	Rural	1	0	0	0	0	0	1	0	1	1
other	Peri-urban	1	0	0	0	0	0	1	0	1	1
other	Peri-urban	1	0	0	0	0	0	1	0	1	1
iTaukei	Urban	1	0	0	0	0	0	1	0	1	1
other	Rural	1	0	0	0	0	0	1	0	1	0
other	Urban	1	0	0	0	0	0	1	0	0	1
other	Peri-urban	1	0	0	0	0	0	1	0	0	1
other	Rural	1	0	0	0	0	0	1	0	0	1
other	Rural	1	0	0	0	0	0	1	0	0	1
iTaukei	Rural	1	0	0	0	0	0	1	0	0	1
other	Rural	1	0	0	0	0	0	1	0	0	1
iTaukei	Rural	1	0	0	0	0	0	1	0	0	1
other	Rural	1	0	0	0	0	0	1	0	0	1
other	Rural	1	0	0	0	0	0	1	0	0	0
other	Peri-urban	1	0	0	0	0	0	1	0	0	0
other	Rural	1	0	0	0	0	0	1	0	0	0
other	Rural	1	0	0	0	0	0	1	0	0	0
iTaukei	Rural	1	0	0	0	0	0	0	1	1	1
other	Rural	1	0	0	0	0	0	0	1	1	1
iTaukei	Rural	1	0	0	0	0	0	0	1	0	0
iTaukei	Peri-urban	1	0	0	0	0	0	0	0	1	1
other	Peri-urban	1	0	0	0	0	0	0	0	1	1
iTaukei	Peri-urban	1	0	0	0	0	0	0	0	1	1
iTaukei	Rural	1	0	0	0	0	0	0	0	1	1
iTaukei	Rural	1	0	0	0	0	0	0	0	1	1
iTaukei	Rural	1	0	0	0	0	0	0	0	1	1
iTaukei	Rural	1	0	0	0	0	0	0	0	1	1
iTaukei	Rural	1	0	0	0	0	0	0	0	1	1
iTaukei	Rural	1	0	0	0	0	0	0	0	1	1
iTaukei	Rural	1	0	0	0	0	0	0	0	1	1
iTaukei	Rural	1	0	0	0	0	0	0	0	1	1
iTaukei	Peri-urban	1	0	0	0	0	0	0	0	1	1
iTaukei	Peri-urban	1	0	0	0	0	0	0	0	1	1
iTaukei	Peri-urban	1	0	0	0	0	0	0	0	1	1
iTaukei	Peri-urban	1	0	0	0	0	0	0	0	1	1
iTaukei	Rural	1	0	0	0	0	0	0	0	1	1
iTaukei	Rural	1	0	0	0	0	0	0	0	1	1
other	Rural	1	0	0	0	0	0	0	0	1	1
iTaukei	Urban	1	0	0	0	0	0	0	0	1	1
iTaukei	Urban	1	0	0	0	0	0	0	0	1	1
iTaukei	Rural	1	0	0	0	0	0	0	0	1	1
iTaukei	Rural	1	0	0	0	0	0	0	0	1	1
iTaukei	Rural	1	0	0	0	0	0	0	0	1	1
iTaukei	Rural	1	0	0	0	0	0	0	0	1	1
iTaukei	Rural	1	0	0	0	0	0	0	0	1	1
other	Urban	1	0	0	0	0	0	0	0	1	1
iTaukei	Rural	1	0	0	0	0	0	0	0	1	1
iTaukei	Rural	1	0	0	0	0	0	0	0	1	1
iTaukei	Rural	1	0	0	0	0	0	0	0	1	1
other	Rural	1	0	0	0	0	0	0	0	1	1
iTaukei	Rural	1	0	0	0	0	0	0	0	1	1
iTaukei	Rural	1	0	0	0	0	0	0	0	1	1
iTaukei	Rural	1	0	0	0	0	0	0	0	1	1
other	Rural	1	0	0	0	0	0	0	0	1	1
other	Rural	1	0	0	0	0	0	0	0	1	1
iTaukei	Rural	1	0	0	0	0	0	0	0	1	1
iTaukei	Urban	1	0	0	0	0	0	0	0	1	1
iTaukei	Urban	1	0	0	0	0	0	0	0	1	1
iTaukei	Urban	1	0	0	0	0	0	0	0	1	1
iTaukei	Urban	1	0	0	0	0	0	0	0	1	1
iTaukei	Urban	1	0	0	0	0	0	0	0	1	1
iTaukei	Urban	1	0	0	0	0	0	0	0	1	1
iTaukei	Urban	1	0	0	0	0	0	0	0	1	1
iTaukei	Rural	1	0	0	0	0	0	0	0	1	1
iTaukei	Rural	1	0	0	0	0	0	0	0	1	1
iTaukei	Rural	1	0	0	0	0	0	0	0	1	1
other	Rural	1	0	0	0	0	0	0	0	1	1
iTaukei	Rural	1	0	0	0	0	0	0	0	1	1
other	Rural	1	0	0	0	0	0	0	0	1	1
other	Rural	1	0	0	0	0	0	0	0	1	1
iTaukei	Urban	1	0	0	0	0	0	0	0	1	1
other	Rural	1	0	0	0	0	0	0	0	1	1
other	Rural	1	0	0	0	0	0	0	0	1	1
other	Urban	1	0	0	0	0	0	0	0	1	1
iTaukei	Peri-urban	1	0	0	0	0	0	0	0	1	1
other	Peri-urban	1	0	0	0	0	0	0	0	1	1
other	Peri-urban	1	0	0	0	0	0	0	0	1	1
other	Peri-urban	1	0	0	0	0	0	0	0	1	1
iTaukei	Peri-urban	1	0	0	0	0	0	0	0	1	1
iTaukei	Peri-urban	1	0	0	0	0	0	0	0	1	1
iTaukei	Peri-urban	1	0	0	0	0	0	0	0	1	1
iTaukei	Rural	1	0	0	0	0	0	0	0	1	1
iTaukei	Rural	1	0	0	0	0	0	0	0	1	1
other	Peri-urban	1	0	0	0	0	0	0	0	1	1
iTaukei	Peri-urban	1	0	0	0	0	0	0	0	1	1
other	Peri-urban	1	0	0	0	0	0	0	0	1	1
other	Peri-urban	1	0	0	0	0	0	0	0	1	1
other	Peri-urban	1	0	0	0	0	0	0	0	1	1
iTaukei	Peri-urban	1	0	0	0	0	0	0	0	1	1
other	Peri-urban	1	0	0	0	0	0	0	0	1	1
iTaukei	Peri-urban	1	0	0	0	0	0	0	0	1	1
other	Peri-urban	1	0	0	0	0	0	0	0	1	1
iTaukei	Urban	1	0	0	0	0	0	0	0	1	1
iTaukei	Rural	1	0	0	0	0	0	0	0	1	1
iTaukei	Rural	1	0	0	0	0	0	0	0	1	1
iTaukei	Rural	1	0	0	0	0	0	0	0	1	1
iTaukei	Rural	1	0	0	0	0	0	0	0	1	1
iTaukei	Urban	1	0	0	0	0	0	0	0	1	0
iTaukei	Rural	1	0	0	0	0	0	0	0	1	0
iTaukei	Rural	1	0	0	0	0	0	0	0	1	0
iTaukei	Urban	1	0	0	0	0	0	0	0	1	0
iTaukei	Rural	1	0	0	0	0	0	0	0	1	0
iTaukei	Peri-urban	1	0	0	0	0	0	0	0	1	0
other	Rural	1	0	0	0	0	0	0	0	0	1
other	Rural	1	0	0	0	0	0	0	0	0	1
other	Rural	1	0	0	0	0	0	0	0	0	1
other	Rural	1	0	0	0	0	0	0	0	0	1
other	Rural	1	0	0	0	0	0	0	0	0	1
iTaukei	Rural	1	0	0	0	0	0	0	0	0	1
iTaukei	Rural	1	0	0	0	0	0	0	0	0	1
iTaukei	Rural	1	0	0	0	0	0	0	0	0	1
iTaukei	Rural	1	0	0	0	0	0	0	0	0	1
iTaukei	Rural	1	0	0	0	0	0	0	0	0	1
iTaukei	Rural	1	0	0	0	0	0	0	0	0	1
iTaukei	Rural	1	0	0	0	0	0	0	0	0	1
iTaukei	Rural	1	0	0	0	0	0	0	0	0	1
other	Peri-urban	1	0	0	0	0	0	0	0	0	1
other	Peri-urban	1	0	0	0	0	0	0	0	0	1
other	Rural	1	0	0	0	0	0	0	0	0	1
other	Rural	1	0	0	0	0	0	0	0	0	0
iTaukei	Rural	1	0	0	0	0	0	0	0	0	0
iTaukei	Peri-urban	1	0	0	0	0	0	0	0	0	0
other	Peri-urban	1	0	0	0	0	0	0	0	0	0
iTaukei	Urban	1	0	0	0	0	0	0	0	0	0
other	Rural	1	0	0	0	0	0	0	0	0	0
iTaukei	Rural	0	1	1	1	0	1	0	0	1	1
iTaukei	Rural	0	1	1	1	0	0	0	0	1	1
iTaukei	Rural	0	1	1	0	0	0	1	0	1	1
iTaukei	Urban	0	1	1	0	0	0	0	1	1	1
other	Rural	0	1	1	0	0	0	0	0	1	1
iTaukei	Rural	0	1	0	1	0	1	1	1	1	0
iTaukei	Urban	0	1	0	1	0	1	1	0	1	1
iTaukei	Peri-urban	0	1	0	1	0	1	0	0	1	1
iTaukei	Rural	0	1	0	1	0	0	1	1	1	1
iTaukei	Rural	0	1	0	1	0	0	1	1	1	1
iTaukei	Rural	0	1	0	1	0	0	1	1	1	1
iTaukei	Rural	0	1	0	1	0	0	1	1	1	1
iTaukei	Rural	0	1	0	1	0	0	1	1	1	1
iTaukei	Rural	0	1	0	1	0	0	1	1	1	1
iTaukei	Rural	0	1	0	1	0	0	1	1	0	1
iTaukei	Rural	0	1	0	1	0	0	1	0	1	1
iTaukei	Rural	0	1	0	1	0	0	1	0	1	1
iTaukei	Rural	0	1	0	1	0	0	1	0	1	1
iTaukei	Rural	0	1	0	1	0	0	0	1	1	1
iTaukei	Rural	0	1	0	1	0	0	0	1	1	1
iTaukei	Rural	0	1	0	1	0	0	0	1	1	1
iTaukei	Rural	0	1	0	1	0	0	0	1	1	1
iTaukei	Rural	0	1	0	1	0	0	0	1	1	1
other	Rural	0	1	0	1	0	0	0	1	1	1
iTaukei	Rural	0	1	0	1	0	0	0	1	1	1
iTaukei	Rural	0	1	0	1	0	0	0	1	0	1
iTaukei	Rural	0	1	0	1	0	0	0	0	1	1
iTaukei	Rural	0	1	0	1	0	0	0	0	1	1
iTaukei	Rural	0	1	0	1	0	0	0	0	1	1
iTaukei	Rural	0	1	0	1	0	0	0	0	1	1
iTaukei	Rural	0	1	0	1	0	0	0	0	1	1
iTaukei	Rural	0	1	0	1	0	0	0	0	1	1
iTaukei	Rural	0	1	0	1	0	0	0	0	1	1
iTaukei	Rural	0	1	0	1	0	0	0	0	1	1
iTaukei	Rural	0	1	0	1	0	0	0	0	1	1
iTaukei	Rural	0	1	0	1	0	0	0	0	0	1
iTaukei	Rural	0	1	0	1	0	0	0	0	0	1
iTaukei	Rural	0	1	0	1	0	0	0	0	0	0
iTaukei	Rural	0	1	0	0	0	1	1	1	0	1
iTaukei	Rural	0	1	0	0	0	1	1	0	1	1
other	Rural	0	1	0	0	0	1	1	0	1	1
other	Rural	0	1	0	0	0	1	1	0	1	1
iTaukei	Rural	0	1	0	0	0	1	1	0	1	0
iTaukei	Rural	0	1	0	0	0	0	1	1	1	1
iTaukei	Urban	0	1	0	0	0	0	1	1	1	1
iTaukei	Rural	0	1	0	0	0	0	1	1	1	1
iTaukei	Rural	0	1	0	0	0	0	1	1	1	1
iTaukei	Rural	0	1	0	0	0	0	1	1	0	1
iTaukei	Rural	0	1	0	0	0	0	1	0	1	1
iTaukei	Urban	0	1	0	0	0	0	1	0	1	1
iTaukei	Rural	0	1	0	0	0	0	1	0	1	0
iTaukei	Rural	0	1	0	0	0	0	0	1	1	1
iTaukei	Rural	0	1	0	0	0	0	0	1	1	1
iTaukei	Rural	0	1	0	0	0	0	0	1	1	1
iTaukei	Rural	0	1	0	0	0	0	0	1	1	1
iTaukei	Rural	0	1	0	0	0	0	0	1	1	1
iTaukei	Rural	0	1	0	0	0	0	0	1	1	1
iTaukei	Rural	0	1	0	0	0	0	0	1	1	1
iTaukei	Rural	0	1	0	0	0	0	0	1	1	0
iTaukei	Rural	0	1	0	0	0	0	0	1	1	0
iTaukei	Peri-urban	0	1	0	0	0	0	0	1	0	1
iTaukei	Urban	0	1	0	0	0	0	0	0	1	1
iTaukei	Rural	0	1	0	0	0	0	0	0	1	1
iTaukei	Rural	0	1	0	0	0	0	0	0	1	1
iTaukei	Rural	0	1	0	0	0	0	0	0	1	1
iTaukei	Rural	0	1	0	0	0	0	0	0	1	1
other	Rural	0	1	0	0	0	0	0	0	1	1
iTaukei	Urban	0	1	0	0	0	0	0	0	1	1
iTaukei	Peri-urban	0	1	0	0	0	0	0	0	1	1
iTaukei	Peri-urban	0	1	0	0	0	0	0	0	1	1
iTaukei	Peri-urban	0	1	0	0	0	0	0	0	1	1
other	Rural	0	1	0	0	0	0	0	0	1	1
iTaukei	Rural	0	1	0	0	0	0	0	0	1	1
iTaukei	Rural	0	1	0	0	0	0	0	0	1	1
iTaukei	Rural	0	1	0	0	0	0	0	0	1	1
iTaukei	Urban	0	1	0	0	0	0	0	0	1	1
iTaukei	Rural	0	1	0	0	0	0	0	0	1	1
iTaukei	Rural	0	1	0	0	0	0	0	0	1	1
iTaukei	Urban	0	1	0	0	0	0	0	0	1	1
iTaukei	Rural	0	1	0	0	0	0	0	0	1	1
iTaukei	Rural	0	1	0	0	0	0	0	0	1	1
iTaukei	Rural	0	1	0	0	0	0	0	0	1	1
iTaukei	Rural	0	1	0	0	0	0	0	0	1	1
iTaukei	Rural	0	1	0	0	0	0	0	0	1	1
other	Peri-urban	0	1	0	0	0	0	0	0	0	1
other	Rural	0	0	1	1	0	0	0	0	1	1
iTaukei	Rural	0	0	1	1	0	0	0	0	1	1
iTaukei	Rural	0	0	1	0	0	0	1	0	1	1
iTaukei	Rural	0	0	1	0	0	0	0	0	1	1
other	Rural	0	0	1	0	0	0	0	0	1	1
iTaukei	Rural	0	0	0	1	0	1	1	1	0	1
iTaukei	Rural	0	0	0	1	0	1	1	1	0	0
iTaukei	Rural	0	0	0	1	0	1	1	0	1	1
other	Peri-urban	0	0	0	1	0	1	1	0	0	1
iTaukei	Rural	0	0	0	1	0	1	1	0	0	1
iTaukei	Peri-urban	0	0	0	1	0	1	0	0	1	1
iTaukei	Rural	0	0	0	1	0	1	0	0	1	1
iTaukei	Rural	0	0	0	1	0	1	0	0	1	1
iTaukei	Peri-urban	0	0	0	1	0	1	0	0	1	0
iTaukei	Peri-urban	0	0	0	1	0	1	0	0	1	0
iTaukei	Rural	0	0	0	1	0	1	0	0	0	1
iTaukei	Urban	0	0	0	1	0	0	1	1	1	1
iTaukei	Urban	0	0	0	1	0	0	1	0	1	1
iTaukei	Rural	0	0	0	1	0	0	1	0	1	1
iTaukei	Rural	0	0	0	1	0	0	1	0	1	1
iTaukei	Rural	0	0	0	1	0	0	1	0	1	1
iTaukei	Rural	0	0	0	1	0	0	1	0	1	1
iTaukei	Rural	0	0	0	1	0	0	1	0	1	1
iTaukei	Rural	0	0	0	1	0	0	1	0	1	1
iTaukei	Rural	0	0	0	1	0	0	1	0	1	1
iTaukei	Rural	0	0	0	1	0	0	1	0	1	1
iTaukei	Rural	0	0	0	1	0	0	1	0	1	1
iTaukei	Rural	0	0	0	1	0	0	1	0	1	1
iTaukei	Urban	0	0	0	1	0	0	1	0	1	1
iTaukei	Rural	0	0	0	1	0	0	1	0	1	0
iTaukei	Rural	0	0	0	1	0	0	1	0	1	0
iTaukei	Rural	0	0	0	1	0	0	1	0	0	1
iTaukei	Urban	0	0	0	1	0	0	1	0	0	1
iTaukei	Rural	0	0	0	1	0	0	1	0	0	0
iTaukei	Rural	0	0	0	1	0	0	0	1	0	0
iTaukei	Rural	0	0	0	1	0	0	0	0	1	1
iTaukei	Rural	0	0	0	1	0	0	0	0	1	1
iTaukei	Rural	0	0	0	1	0	0	0	0	1	1
iTaukei	Rural	0	0	0	1	0	0	0	0	1	1
iTaukei	Peri-urban	0	0	0	1	0	0	0	0	1	1
iTaukei	Rural	0	0	0	1	0	0	0	0	1	1
iTaukei	Rural	0	0	0	1	0	0	0	0	1	1
iTaukei	Rural	0	0	0	1	0	0	0	0	1	1
iTaukei	Rural	0	0	0	1	0	0	0	0	1	1
iTaukei	Rural	0	0	0	1	0	0	0	0	1	1
iTaukei	Rural	0	0	0	1	0	0	0	0	1	1
iTaukei	Rural	0	0	0	1	0	0	0	0	1	1
iTaukei	Rural	0	0	0	1	0	0	0	0	1	1
iTaukei	Rural	0	0	0	1	0	0	0	0	1	1
iTaukei	Urban	0	0	0	1	0	0	0	0	1	1
iTaukei	Rural	0	0	0	1	0	0	0	0	1	1
iTaukei	Rural	0	0	0	1	0	0	0	0	1	1
iTaukei	Rural	0	0	0	1	0	0	0	0	1	1
iTaukei	Rural	0	0	0	1	0	0	0	0	1	1
iTaukei	Rural	0	0	0	1	0	0	0	0	1	1
iTaukei	Rural	0	0	0	1	0	0	0	0	1	1
iTaukei	Rural	0	0	0	1	0	0	0	0	1	1
iTaukei	Rural	0	0	0	1	0	0	0	0	1	1
iTaukei	Peri-urban	0	0	0	1	0	0	0	0	1	1
iTaukei	Rural	0	0	0	1	0	0	0	0	1	1
iTaukei	Rural	0	0	0	1	0	0	0	0	1	1
iTaukei	Rural	0	0	0	1	0	0	0	0	1	1
iTaukei	Urban	0	0	0	1	0	0	0	0	1	1
iTaukei	Urban	0	0	0	1	0	0	0	0	1	1
iTaukei	Urban	0	0	0	1	0	0	0	0	1	1
iTaukei	Urban	0	0	0	1	0	0	0	0	1	1
iTaukei	Urban	0	0	0	1	0	0	0	0	1	1
iTaukei	Rural	0	0	0	1	0	0	0	0	1	1
iTaukei	Rural	0	0	0	1	0	0	0	0	1	1
iTaukei	Rural	0	0	0	1	0	0	0	0	1	1
iTaukei	Peri-urban	0	0	0	1	0	0	0	0	1	0
iTaukei	Rural	0	0	0	1	0	0	0	0	1	0
iTaukei	Rural	0	0	0	1	0	0	0	0	0	1
iTaukei	Rural	0	0	0	1	0	0	0	0	0	1
iTaukei	Rural	0	0	0	1	0	0	0	0	0	1
iTaukei	Rural	0	0	0	1	0	0	0	0	0	1
iTaukei	Rural	0	0	0	1	0	0	0	0	0	1
iTaukei	Rural	0	0	0	1	0	0	0	0	0	1
iTaukei	Rural	0	0	0	1	0	0	0	0	0	1
iTaukei	Rural	0	0	0	1	0	0	0	0	0	1
iTaukei	Rural	0	0	0	1	0	0	0	0	0	1
iTaukei	Rural	0	0	0	1	0	0	0	0	0	1
iTaukei	Rural	0	0	0	1	0	0	0	0	0	1
iTaukei	Rural	0	0	0	1	0	0	0	0	0	1
iTaukei	Rural	0	0	0	1	0	0	0	0	0	1
iTaukei	Rural	0	0	0	1	0	0	0	0	0	0
iTaukei	Rural	0	0	0	1	0	0	0	0	0	0
iTaukei	Rural	0	0	0	1	0	0	0	0	0	0
other	Rural	0	0	0	0	1	1	1	0	1	0
iTaukei	Rural	0	0	0	0	0	1	1	1	1	1
iTaukei	Rural	0	0	0	0	0	1	1	1	1	1
iTaukei	Rural	0	0	0	0	0	1	1	1	0	1
iTaukei	Urban	0	0	0	0	0	1	1	0	1	1
other	Urban	0	0	0	0	0	1	1	0	1	1
iTaukei	Urban	0	0	0	0	0	1	1	0	1	1
iTaukei	Urban	0	0	0	0	0	1	1	0	1	1
other	Urban	0	0	0	0	0	1	1	0	1	1
iTaukei	Urban	0	0	0	0	0	1	1	0	1	1
iTaukei	Peri-urban	0	0	0	0	0	1	1	0	1	1
other	Urban	0	0	0	0	0	1	1	0	1	1
other	Urban	0	0	0	0	0	1	1	0	1	1
iTaukei	Urban	0	0	0	0	0	1	1	0	1	1
iTaukei	Urban	0	0	0	0	0	1	1	0	1	1
other	Urban	0	0	0	0	0	1	1	0	1	1
iTaukei	Urban	0	0	0	0	0	1	1	0	1	1
iTaukei	Urban	0	0	0	0	0	1	1	0	1	1
iTaukei	Urban	0	0	0	0	0	1	1	0	1	1
other	Peri-urban	0	0	0	0	0	1	1	0	1	1
iTaukei	Peri-urban	0	0	0	0	0	1	1	0	1	1
iTaukei	Peri-urban	0	0	0	0	0	1	1	0	1	1
iTaukei	Rural	0	0	0	0	0	1	1	0	1	1
iTaukei	Rural	0	0	0	0	0	1	1	0	1	1
iTaukei	Urban	0	0	0	0	0	1	1	0	1	1
other	Urban	0	0	0	0	0	1	1	0	1	1
iTaukei	Rural	0	0	0	0	0	1	1	0	1	1
iTaukei	Rural	0	0	0	0	0	1	1	0	1	1
other	Urban	0	0	0	0	0	1	1	0	1	1
iTaukei	Urban	0	0	0	0	0	1	1	0	1	1
iTaukei	Peri-urban	0	0	0	0	0	1	1	0	1	1
other	Peri-urban	0	0	0	0	0	1	1	0	1	1
iTaukei	Urban	0	0	0	0	0	1	1	0	1	1
iTaukei	Urban	0	0	0	0	0	1	1	0	1	1
iTaukei	Urban	0	0	0	0	0	1	1	0	1	1
iTaukei	Rural	0	0	0	0	0	1	1	0	1	1
iTaukei	Rural	0	0	0	0	0	1	1	0	1	1
iTaukei	Peri-urban	0	0	0	0	0	1	1	0	1	1
iTaukei	Urban	0	0	0	0	0	1	1	0	1	1
iTaukei	Rural	0	0	0	0	0	1	1	0	1	1
other	Urban	0	0	0	0	0	1	1	0	1	0
iTaukei	Urban	0	0	0	0	0	1	1	0	1	0
other	Urban	0	0	0	0	0	1	1	0	1	0
iTaukei	Peri-urban	0	0	0	0	0	1	1	0	1	0
iTaukei	Urban	0	0	0	0	0	1	1	0	1	0
iTaukei	Urban	0	0	0	0	0	1	1	0	1	0
other	Peri-urban	0	0	0	0	0	1	1	0	1	0
iTaukei	Peri-urban	0	0	0	0	0	1	1	0	1	0
iTaukei	Rural	0	0	0	0	0	1	1	0	1	0
other	Urban	0	0	0	0	0	1	1	0	1	0
other	Urban	0	0	0	0	0	1	1	0	1	0
iTaukei	Peri-urban	0	0	0	0	0	1	1	0	1	0
iTaukei	Peri-urban	0	0	0	0	0	1	1	0	1	0
other	Peri-urban	0	0	0	0	0	1	1	0	1	0
other	Rural	0	0	0	0	0	1	1	0	0	1
iTaukei	Rural	0	0	0	0	0	1	1	0	0	1
other	Peri-urban	0	0	0	0	0	1	1	0	0	1
other	Rural	0	0	0	0	0	1	1	0	0	1
iTaukei	Rural	0	0	0	0	0	1	1	0	0	0
other	Urban	0	0	0	0	0	1	1	0	0	0
iTaukei	Urban	0	0	0	0	0	1	0	0	1	1
iTaukei	Urban	0	0	0	0	0	1	0	0	1	1
iTaukei	Urban	0	0	0	0	0	1	0	0	1	1
iTaukei	Urban	0	0	0	0	0	1	0	0	1	1
iTaukei	Urban	0	0	0	0	0	1	0	0	1	1
iTaukei	Urban	0	0	0	0	0	1	0	0	1	1
iTaukei	Urban	0	0	0	0	0	1	0	0	1	1
iTaukei	Urban	0	0	0	0	0	1	0	0	1	1
iTaukei	Urban	0	0	0	0	0	1	0	0	1	1
iTaukei	Urban	0	0	0	0	0	1	0	0	1	1
iTaukei	Peri-urban	0	0	0	0	0	1	0	0	1	1
iTaukei	Urban	0	0	0	0	0	1	0	0	1	1
iTaukei	Peri-urban	0	0	0	0	0	1	0	0	1	1
other	Peri-urban	0	0	0	0	0	1	0	0	1	1
iTaukei	Rural	0	0	0	0	0	1	0	0	1	1
iTaukei	Urban	0	0	0	0	0	1	0	0	1	1
other	Urban	0	0	0	0	0	1	0	0	1	1
iTaukei	Rural	0	0	0	0	0	1	0	0	1	1
iTaukei	Rural	0	0	0	0	0	1	0	0	1	1
other	Urban	0	0	0	0	0	1	0	0	1	1
iTaukei	Urban	0	0	0	0	0	1	0	0	1	1
other	Urban	0	0	0	0	0	1	0	0	1	1
iTaukei	Urban	0	0	0	0	0	1	0	0	1	1
iTaukei	Rural	0	0	0	0	0	1	0	0	1	1
other	Peri-urban	0	0	0	0	0	1	0	0	1	1
other	Peri-urban	0	0	0	0	0	1	0	0	1	1
iTaukei	Peri-urban	0	0	0	0	0	1	0	0	1	1
iTaukei	Peri-urban	0	0	0	0	0	1	0	0	1	1
other	Peri-urban	0	0	0	0	0	1	0	0	1	1
iTaukei	Urban	0	0	0	0	0	1	0	0	1	1
other	Urban	0	0	0	0	0	1	0	0	1	1
iTaukei	Urban	0	0	0	0	0	1	0	0	1	1
other	Rural	0	0	0	0	0	1	0	0	1	1
other	Rural	0	0	0	0	0	1	0	0	1	1
other	Rural	0	0	0	0	0	1	0	0	1	1
iTaukei	Rural	0	0	0	0	0	1	0	0	1	1
other	Urban	0	0	0	0	0	1	0	0	1	1
other	Urban	0	0	0	0	0	1	0	0	1	1
other	Peri-urban	0	0	0	0	0	1	0	0	1	1
iTaukei	Urban	0	0	0	0	0	1	0	0	1	1
other	Urban	0	0	0	0	0	1	0	0	1	1
other	Urban	0	0	0	0	0	1	0	0	1	1
iTaukei	Rural	0	0	0	0	0	1	0	0	1	1
iTaukei	Peri-urban	0	0	0	0	0	1	0	0	1	1
iTaukei	Urban	0	0	0	0	0	1	0	0	1	0
iTaukei	Urban	0	0	0	0	0	1	0	0	1	0
iTaukei	Urban	0	0	0	0	0	1	0	0	1	0
iTaukei	Urban	0	0	0	0	0	1	0	0	1	0
other	Urban	0	0	0	0	0	1	0	0	1	0
iTaukei	Rural	0	0	0	0	0	1	0	0	1	0
iTaukei	Urban	0	0	0	0	0	1	0	0	1	0
other	Urban	0	0	0	0	0	1	0	0	1	0
other	Urban	0	0	0	0	0	1	0	0	1	0
iTaukei	Rural	0	0	0	0	0	1	0	0	1	0
iTaukei	Peri-urban	0	0	0	0	0	1	0	0	1	0
iTaukei	Rural	0	0	0	0	0	1	0	0	0	1
iTaukei	Rural	0	0	0	0	0	1	0	0	0	1
iTaukei	Rural	0	0	0	0	0	1	0	0	0	1
iTaukei	Rural	0	0	0	0	0	1	0	0	0	1
iTaukei	Rural	0	0	0	0	0	1	0	0	0	1
iTaukei	Urban	0	0	0	0	0	1	0	0	0	0
iTaukei	Urban	0	0	0	0	0	1	0	0	0	0
iTaukei	Urban	0	0	0	0	0	1	0	0	0	0
other	Urban	0	0	0	0	0	1	0	0	0	0
iTaukei	Urban	0	0	0	0	0	1	0	0	0	0
other	Rural	0	0	0	0	0	1	0	0	0	0
iTaukei	Urban	0	0	0	0	0	0	1	1	1	1
iTaukei	Rural	0	0	0	0	0	0	1	1	1	1
iTaukei	Rural	0	0	0	0	0	0	1	1	1	1
iTaukei	Rural	0	0	0	0	0	0	1	1	0	1
iTaukei	Urban	0	0	0	0	0	0	1	0	1	1
iTaukei	Urban	0	0	0	0	0	0	1	0	1	1
iTaukei	Urban	0	0	0	0	0	0	1	0	1	1
other	Urban	0	0	0	0	0	0	1	0	1	1
iTaukei	Urban	0	0	0	0	0	0	1	0	1	1
other	Urban	0	0	0	0	0	0	1	0	1	1
iTaukei	Urban	0	0	0	0	0	0	1	0	1	1
iTaukei	Urban	0	0	0	0	0	0	1	0	1	1
other	Urban	0	0	0	0	0	0	1	0	1	1
other	Urban	0	0	0	0	0	0	1	0	1	1
other	Urban	0	0	0	0	0	0	1	0	1	1
iTaukei	Urban	0	0	0	0	0	0	1	0	1	1
iTaukei	Urban	0	0	0	0	0	0	1	0	1	1
other	Urban	0	0	0	0	0	0	1	0	1	1
other	Urban	0	0	0	0	0	0	1	0	1	1
iTaukei	Urban	0	0	0	0	0	0	1	0	1	1
other	Urban	0	0	0	0	0	0	1	0	1	1
iTaukei	Urban	0	0	0	0	0	0	1	0	1	1
other	Urban	0	0	0	0	0	0	1	0	1	1
iTaukei	Urban	0	0	0	0	0	0	1	0	1	1
iTaukei	Urban	0	0	0	0	0	0	1	0	1	1
iTaukei	Urban	0	0	0	0	0	0	1	0	1	1
iTaukei	Urban	0	0	0	0	0	0	1	0	1	1
iTaukei	Urban	0	0	0	0	0	0	1	0	1	1
other	Urban	0	0	0	0	0	0	1	0	1	1
iTaukei	Urban	0	0	0	0	0	0	1	0	1	1
iTaukei	Peri-urban	0	0	0	0	0	0	1	0	1	1
iTaukei	Peri-urban	0	0	0	0	0	0	1	0	1	1
iTaukei	Urban	0	0	0	0	0	0	1	0	1	1
iTaukei	Urban	0	0	0	0	0	0	1	0	1	1
iTaukei	Urban	0	0	0	0	0	0	1	0	1	1
iTaukei	Urban	0	0	0	0	0	0	1	0	1	1
other	Urban	0	0	0	0	0	0	1	0	1	1
iTaukei	Urban	0	0	0	0	0	0	1	0	1	1
iTaukei	Urban	0	0	0	0	0	0	1	0	1	1
iTaukei	Urban	0	0	0	0	0	0	1	0	1	1
iTaukei	Urban	0	0	0	0	0	0	1	0	1	1
iTaukei	Urban	0	0	0	0	0	0	1	0	1	1
iTaukei	Urban	0	0	0	0	0	0	1	0	1	1
iTaukei	Urban	0	0	0	0	0	0	1	0	1	1
other	Peri-urban	0	0	0	0	0	0	1	0	1	1
iTaukei	Peri-urban	0	0	0	0	0	0	1	0	1	1
iTaukei	Peri-urban	0	0	0	0	0	0	1	0	1	1
iTaukei	Peri-urban	0	0	0	0	0	0	1	0	1	1
iTaukei	Urban	0	0	0	0	0	0	1	0	1	1
iTaukei	Urban	0	0	0	0	0	0	1	0	1	1
iTaukei	Urban	0	0	0	0	0	0	1	0	1	1
iTaukei	Urban	0	0	0	0	0	0	1	0	1	1
iTaukei	Rural	0	0	0	0	0	0	1	0	1	1
iTaukei	Rural	0	0	0	0	0	0	1	0	1	1
iTaukei	Urban	0	0	0	0	0	0	1	0	1	1
iTaukei	Rural	0	0	0	0	0	0	1	0	1	1
iTaukei	Rural	0	0	0	0	0	0	1	0	1	1
iTaukei	Rural	0	0	0	0	0	0	1	0	1	1
iTaukei	Rural	0	0	0	0	0	0	1	0	1	1
iTaukei	Rural	0	0	0	0	0	0	1	0	1	1
iTaukei	Rural	0	0	0	0	0	0	1	0	1	1
iTaukei	Rural	0	0	0	0	0	0	1	0	1	1
iTaukei	Rural	0	0	0	0	0	0	1	0	1	1
iTaukei	Rural	0	0	0	0	0	0	1	0	1	1
iTaukei	Rural	0	0	0	0	0	0	1	0	1	1
iTaukei	Rural	0	0	0	0	0	0	1	0	1	1
iTaukei	Urban	0	0	0	0	0	0	1	0	1	1
iTaukei	Urban	0	0	0	0	0	0	1	0	1	1
iTaukei	Urban	0	0	0	0	0	0	1	0	1	1
other	Peri-urban	0	0	0	0	0	0	1	0	1	1
other	Peri-urban	0	0	0	0	0	0	1	0	1	1
iTaukei	Peri-urban	0	0	0	0	0	0	1	0	1	1
other	Peri-urban	0	0	0	0	0	0	1	0	1	1
iTaukei	Urban	0	0	0	0	0	0	1	0	1	1
iTaukei	Urban	0	0	0	0	0	0	1	0	1	1
iTaukei	Urban	0	0	0	0	0	0	1	0	1	1
iTaukei	Urban	0	0	0	0	0	0	1	0	1	1
iTaukei	Urban	0	0	0	0	0	0	1	0	1	1
iTaukei	Rural	0	0	0	0	0	0	1	0	1	1
iTaukei	Rural	0	0	0	0	0	0	1	0	1	1
iTaukei	Rural	0	0	0	0	0	0	1	0	1	1
iTaukei	Rural	0	0	0	0	0	0	1	0	1	1
other	Rural	0	0	0	0	0	0	1	0	1	1
iTaukei	Rural	0	0	0	0	0	0	1	0	1	1
iTaukei	Rural	0	0	0	0	0	0	1	0	1	1
iTaukei	Rural	0	0	0	0	0	0	1	0	1	1
iTaukei	Rural	0	0	0	0	0	0	1	0	1	1
iTaukei	Rural	0	0	0	0	0	0	1	0	1	1
iTaukei	Rural	0	0	0	0	0	0	1	0	1	1
iTaukei	Rural	0	0	0	0	0	0	1	0	1	1
iTaukei	Rural	0	0	0	0	0	0	1	0	1	1
iTaukei	Rural	0	0	0	0	0	0	1	0	1	1
iTaukei	Urban	0	0	0	0	0	0	1	0	1	1
other	Urban	0	0	0	0	0	0	1	0	1	1
other	Urban	0	0	0	0	0	0	1	0	1	1
iTaukei	Urban	0	0	0	0	0	0	1	0	1	1
iTaukei	Urban	0	0	0	0	0	0	1	0	1	1
iTaukei	Urban	0	0	0	0	0	0	1	0	1	1
other	Urban	0	0	0	0	0	0	1	0	1	1
iTaukei	Urban	0	0	0	0	0	0	1	0	1	1
other	Urban	0	0	0	0	0	0	1	0	1	1
other	Urban	0	0	0	0	0	0	1	0	1	1
iTaukei	Peri-urban	0	0	0	0	0	0	1	0	1	1
iTaukei	Peri-urban	0	0	0	0	0	0	1	0	1	1
other	Peri-urban	0	0	0	0	0	0	1	0	1	1
other	Peri-urban	0	0	0	0	0	0	1	0	1	1
other	Peri-urban	0	0	0	0	0	0	1	0	1	1
other	Peri-urban	0	0	0	0	0	0	1	0	1	1
other	Peri-urban	0	0	0	0	0	0	1	0	1	1
other	Urban	0	0	0	0	0	0	1	0	1	1
iTaukei	Urban	0	0	0	0	0	0	1	0	1	1
other	Urban	0	0	0	0	0	0	1	0	1	1
other	Urban	0	0	0	0	0	0	1	0	1	1
other	Urban	0	0	0	0	0	0	1	0	1	1
other	Urban	0	0	0	0	0	0	1	0	1	1
iTaukei	Rural	0	0	0	0	0	0	1	0	1	1
iTaukei	Rural	0	0	0	0	0	0	1	0	1	1
iTaukei	Rural	0	0	0	0	0	0	1	0	1	1
iTaukei	Rural	0	0	0	0	0	0	1	0	1	1
iTaukei	Rural	0	0	0	0	0	0	1	0	1	1
other	Peri-urban	0	0	0	0	0	0	1	0	1	1
other	Peri-urban	0	0	0	0	0	0	1	0	1	1
iTaukei	Rural	0	0	0	0	0	0	1	0	1	1
iTaukei	Rural	0	0	0	0	0	0	1	0	1	1
iTaukei	Rural	0	0	0	0	0	0	1	0	1	1
iTaukei	Peri-urban	0	0	0	0	0	0	1	0	1	1
iTaukei	Peri-urban	0	0	0	0	0	0	1	0	1	1
other	Peri-urban	0	0	0	0	0	0	1	0	1	1
iTaukei	Peri-urban	0	0	0	0	0	0	1	0	1	1
iTaukei	Urban	0	0	0	0	0	0	1	0	1	1
iTaukei	Rural	0	0	0	0	0	0	1	0	1	1
iTaukei	Rural	0	0	0	0	0	0	1	0	1	1
iTaukei	Urban	0	0	0	0	0	0	1	0	1	0
other	Urban	0	0	0	0	0	0	1	0	1	0
other	Peri-urban	0	0	0	0	0	0	1	0	1	0
other	Urban	0	0	0	0	0	0	1	0	1	0
iTaukei	Urban	0	0	0	0	0	0	1	0	1	0
other	Rural	0	0	0	0	0	0	1	0	1	0
other	Urban	0	0	0	0	0	0	1	0	1	0
other	Urban	0	0	0	0	0	0	1	0	1	0
other	Urban	0	0	0	0	0	0	1	0	1	0
other	Urban	0	0	0	0	0	0	1	0	1	0
other	Urban	0	0	0	0	0	0	1	0	1	0
iTaukei	Urban	0	0	0	0	0	0	1	0	1	0
iTaukei	Rural	0	0	0	0	0	0	1	0	1	0
iTaukei	Urban	0	0	0	0	0	0	1	0	0	1
iTaukei	Urban	0	0	0	0	0	0	1	0	0	1
other	Peri-urban	0	0	0	0	0	0	1	0	0	1
other	Peri-urban	0	0	0	0	0	0	1	0	0	1
iTaukei	Peri-urban	0	0	0	0	0	0	1	0	0	1
other	Rural	0	0	0	0	0	0	1	0	0	1
iTaukei	Rural	0	0	0	0	0	0	1	0	0	1
iTaukei	Rural	0	0	0	0	0	0	1	0	0	1
iTaukei	Rural	0	0	0	0	0	0	1	0	0	1
iTaukei	Peri-urban	0	0	0	0	0	0	1	0	0	1
other	Peri-urban	0	0	0	0	0	0	1	0	0	1
other	Peri-urban	0	0	0	0	0	0	1	0	0	1
other	Rural	0	0	0	0	0	0	1	0	0	1
iTaukei	Rural	0	0	0	0	0	0	1	0	0	1
iTaukei	Urban	0	0	0	0	0	0	1	0	0	0
iTaukei	Urban	0	0	0	0	0	0	1	0	0	0
other	Peri-urban	0	0	0	0	0	0	1	0	0	0
iTaukei	Urban	0	0	0	0	0	0	1	0	0	0
iTaukei	Rural	0	0	0	0	0	0	0	1	1	1
iTaukei	Rural	0	0	0	0	0	0	0	1	1	1
other	Rural	0	0	0	0	0	0	0	1	1	1
iTaukei	Rural	0	0	0	0	0	0	0	1	1	1
iTaukei	Rural	0	0	0	0	0	0	0	1	0	1
other	Rural	0	0	0	0	0	0	0	1	0	1
iTaukei	Rural	0	0	0	0	0	0	0	1	0	1
iTaukei	Rural	0	0	0	0	0	0	0	1	0	1
iTaukei	Rural	0	0	0	0	0	0	0	1	0	1
iTaukei	Rural	0	0	0	0	0	0	0	1	0	1
iTaukei	Urban	0	0	0	0	0	0	0	0	1	1
iTaukei	Urban	0	0	0	0	0	0	0	0	1	1
iTaukei	Urban	0	0	0	0	0	0	0	0	1	1
iTaukei	Urban	0	0	0	0	0	0	0	0	1	1
iTaukei	Urban	0	0	0	0	0	0	0	0	1	1
iTaukei	Urban	0	0	0	0	0	0	0	0	1	1
iTaukei	Urban	0	0	0	0	0	0	0	0	1	1
iTaukei	Urban	0	0	0	0	0	0	0	0	1	1
iTaukei	Urban	0	0	0	0	0	0	0	0	1	1
other	Urban	0	0	0	0	0	0	0	0	1	1
iTaukei	Urban	0	0	0	0	0	0	0	0	1	1
iTaukei	Urban	0	0	0	0	0	0	0	0	1	1
iTaukei	Urban	0	0	0	0	0	0	0	0	1	1
iTaukei	Urban	0	0	0	0	0	0	0	0	1	1
iTaukei	Urban	0	0	0	0	0	0	0	0	1	1
iTaukei	Urban	0	0	0	0	0	0	0	0	1	1
iTaukei	Urban	0	0	0	0	0	0	0	0	1	1
iTaukei	Urban	0	0	0	0	0	0	0	0	1	1
iTaukei	Urban	0	0	0	0	0	0	0	0	1	1
other	Urban	0	0	0	0	0	0	0	0	1	1
iTaukei	Urban	0	0	0	0	0	0	0	0	1	1
other	Urban	0	0	0	0	0	0	0	0	1	1
other	Urban	0	0	0	0	0	0	0	0	1	1
other	Urban	0	0	0	0	0	0	0	0	1	1
other	Urban	0	0	0	0	0	0	0	0	1	1
other	Urban	0	0	0	0	0	0	0	0	1	1
iTaukei	Urban	0	0	0	0	0	0	0	0	1	1
iTaukei	Urban	0	0	0	0	0	0	0	0	1	1
other	Urban	0	0	0	0	0	0	0	0	1	1
iTaukei	Urban	0	0	0	0	0	0	0	0	1	1
other	Urban	0	0	0	0	0	0	0	0	1	1
iTaukei	Urban	0	0	0	0	0	0	0	0	1	1
iTaukei	Urban	0	0	0	0	0	0	0	0	1	1
iTaukei	Peri-urban	0	0	0	0	0	0	0	0	1	1
iTaukei	Peri-urban	0	0	0	0	0	0	0	0	1	1
iTaukei	Peri-urban	0	0	0	0	0	0	0	0	1	1
iTaukei	Peri-urban	0	0	0	0	0	0	0	0	1	1
iTaukei	Peri-urban	0	0	0	0	0	0	0	0	1	1
iTaukei	Peri-urban	0	0	0	0	0	0	0	0	1	1
iTaukei	Peri-urban	0	0	0	0	0	0	0	0	1	1
iTaukei	Peri-urban	0	0	0	0	0	0	0	0	1	1
iTaukei	Peri-urban	0	0	0	0	0	0	0	0	1	1
iTaukei	Peri-urban	0	0	0	0	0	0	0	0	1	1
iTaukei	Peri-urban	0	0	0	0	0	0	0	0	1	1
other	Peri-urban	0	0	0	0	0	0	0	0	1	1
iTaukei	Peri-urban	0	0	0	0	0	0	0	0	1	1
iTaukei	Peri-urban	0	0	0	0	0	0	0	0	1	1
iTaukei	Peri-urban	0	0	0	0	0	0	0	0	1	1
iTaukei	Peri-urban	0	0	0	0	0	0	0	0	1	1
iTaukei	Peri-urban	0	0	0	0	0	0	0	0	1	1
iTaukei	Peri-urban	0	0	0	0	0	0	0	0	1	1
iTaukei	Peri-urban	0	0	0	0	0	0	0	0	1	1
iTaukei	Peri-urban	0	0	0	0	0	0	0	0	1	1
iTaukei	Urban	0	0	0	0	0	0	0	0	1	1
iTaukei	Urban	0	0	0	0	0	0	0	0	1	1
iTaukei	Urban	0	0	0	0	0	0	0	0	1	1
iTaukei	Urban	0	0	0	0	0	0	0	0	1	1
iTaukei	Urban	0	0	0	0	0	0	0	0	1	1
iTaukei	Urban	0	0	0	0	0	0	0	0	1	1
iTaukei	Urban	0	0	0	0	0	0	0	0	1	1
iTaukei	Urban	0	0	0	0	0	0	0	0	1	1
iTaukei	Urban	0	0	0	0	0	0	0	0	1	1
iTaukei	Urban	0	0	0	0	0	0	0	0	1	1
iTaukei	Urban	0	0	0	0	0	0	0	0	1	1
iTaukei	Urban	0	0	0	0	0	0	0	0	1	1
iTaukei	Urban	0	0	0	0	0	0	0	0	1	1
iTaukei	Urban	0	0	0	0	0	0	0	0	1	1
iTaukei	Urban	0	0	0	0	0	0	0	0	1	1
iTaukei	Urban	0	0	0	0	0	0	0	0	1	1
iTaukei	Urban	0	0	0	0	0	0	0	0	1	1
iTaukei	Urban	0	0	0	0	0	0	0	0	1	1
iTaukei	Urban	0	0	0	0	0	0	0	0	1	1
iTaukei	Urban	0	0	0	0	0	0	0	0	1	1
iTaukei	Urban	0	0	0	0	0	0	0	0	1	1
iTaukei	Urban	0	0	0	0	0	0	0	0	1	1
iTaukei	Urban	0	0	0	0	0	0	0	0	1	1
iTaukei	Urban	0	0	0	0	0	0	0	0	1	1
iTaukei	Urban	0	0	0	0	0	0	0	0	1	1
iTaukei	Urban	0	0	0	0	0	0	0	0	1	1
iTaukei	Urban	0	0	0	0	0	0	0	0	1	1
iTaukei	Urban	0	0	0	0	0	0	0	0	1	1
iTaukei	Urban	0	0	0	0	0	0	0	0	1	1
other	Urban	0	0	0	0	0	0	0	0	1	1
iTaukei	Urban	0	0	0	0	0	0	0	0	1	1
iTaukei	Urban	0	0	0	0	0	0	0	0	1	1
iTaukei	Urban	0	0	0	0	0	0	0	0	1	1
iTaukei	Urban	0	0	0	0	0	0	0	0	1	1
iTaukei	Peri-urban	0	0	0	0	0	0	0	0	1	1
iTaukei	Peri-urban	0	0	0	0	0	0	0	0	1	1
iTaukei	Peri-urban	0	0	0	0	0	0	0	0	1	1
iTaukei	Peri-urban	0	0	0	0	0	0	0	0	1	1
iTaukei	Peri-urban	0	0	0	0	0	0	0	0	1	1
iTaukei	Peri-urban	0	0	0	0	0	0	0	0	1	1
iTaukei	Peri-urban	0	0	0	0	0	0	0	0	1	1
other	Peri-urban	0	0	0	0	0	0	0	0	1	1
iTaukei	Peri-urban	0	0	0	0	0	0	0	0	1	1
other	Urban	0	0	0	0	0	0	0	0	1	1
iTaukei	Urban	0	0	0	0	0	0	0	0	1	1
iTaukei	Urban	0	0	0	0	0	0	0	0	1	1
iTaukei	Urban	0	0	0	0	0	0	0	0	1	1
iTaukei	Urban	0	0	0	0	0	0	0	0	1	1
iTaukei	Urban	0	0	0	0	0	0	0	0	1	1
iTaukei	Urban	0	0	0	0	0	0	0	0	1	1
iTaukei	Urban	0	0	0	0	0	0	0	0	1	1
iTaukei	Urban	0	0	0	0	0	0	0	0	1	1
iTaukei	Urban	0	0	0	0	0	0	0	0	1	1
iTaukei	Urban	0	0	0	0	0	0	0	0	1	1
iTaukei	Urban	0	0	0	0	0	0	0	0	1	1
other	Urban	0	0	0	0	0	0	0	0	1	1
other	Urban	0	0	0	0	0	0	0	0	1	1
other	Urban	0	0	0	0	0	0	0	0	1	1
iTaukei	Urban	0	0	0	0	0	0	0	0	1	1
other	Urban	0	0	0	0	0	0	0	0	1	1
other	Urban	0	0	0	0	0	0	0	0	1	1
iTaukei	Urban	0	0	0	0	0	0	0	0	1	1
iTaukei	Urban	0	0	0	0	0	0	0	0	1	1
iTaukei	Urban	0	0	0	0	0	0	0	0	1	1
iTaukei	Urban	0	0	0	0	0	0	0	0	1	1
iTaukei	Urban	0	0	0	0	0	0	0	0	1	1
iTaukei	Urban	0	0	0	0	0	0	0	0	1	1
iTaukei	Urban	0	0	0	0	0	0	0	0	1	1
iTaukei	Urban	0	0	0	0	0	0	0	0	1	1
iTaukei	Urban	0	0	0	0	0	0	0	0	1	1
iTaukei	Urban	0	0	0	0	0	0	0	0	1	1
iTaukei	Urban	0	0	0	0	0	0	0	0	1	1
iTaukei	Urban	0	0	0	0	0	0	0	0	1	1
iTaukei	Urban	0	0	0	0	0	0	0	0	1	1
iTaukei	Urban	0	0	0	0	0	0	0	0	1	1
iTaukei	Urban	0	0	0	0	0	0	0	0	1	1
iTaukei	Urban	0	0	0	0	0	0	0	0	1	1
iTaukei	Urban	0	0	0	0	0	0	0	0	1	1
iTaukei	Urban	0	0	0	0	0	0	0	0	1	1
iTaukei	Urban	0	0	0	0	0	0	0	0	1	1
iTaukei	Urban	0	0	0	0	0	0	0	0	1	1
iTaukei	Urban	0	0	0	0	0	0	0	0	1	1
iTaukei	Urban	0	0	0	0	0	0	0	0	1	1
iTaukei	Urban	0	0	0	0	0	0	0	0	1	1
iTaukei	Rural	0	0	0	0	0	0	0	0	1	1
iTaukei	Rural	0	0	0	0	0	0	0	0	1	1
iTaukei	Rural	0	0	0	0	0	0	0	0	1	1
iTaukei	Rural	0	0	0	0	0	0	0	0	1	1
iTaukei	Rural	0	0	0	0	0	0	0	0	1	1
iTaukei	Rural	0	0	0	0	0	0	0	0	1	1
iTaukei	Rural	0	0	0	0	0	0	0	0	1	1
iTaukei	Rural	0	0	0	0	0	0	0	0	1	1
iTaukei	Rural	0	0	0	0	0	0	0	0	1	1
iTaukei	Rural	0	0	0	0	0	0	0	0	1	1
iTaukei	Rural	0	0	0	0	0	0	0	0	1	1
iTaukei	Rural	0	0	0	0	0	0	0	0	1	1
iTaukei	Rural	0	0	0	0	0	0	0	0	1	1
iTaukei	Rural	0	0	0	0	0	0	0	0	1	1
iTaukei	Rural	0	0	0	0	0	0	0	0	1	1
iTaukei	Rural	0	0	0	0	0	0	0	0	1	1
iTaukei	Rural	0	0	0	0	0	0	0	0	1	1
iTaukei	Rural	0	0	0	0	0	0	0	0	1	1
iTaukei	Rural	0	0	0	0	0	0	0	0	1	1
iTaukei	Rural	0	0	0	0	0	0	0	0	1	1
iTaukei	Rural	0	0	0	0	0	0	0	0	1	1
iTaukei	Rural	0	0	0	0	0	0	0	0	1	1
iTaukei	Rural	0	0	0	0	0	0	0	0	1	1
iTaukei	Rural	0	0	0	0	0	0	0	0	1	1
iTaukei	Rural	0	0	0	0	0	0	0	0	1	1
iTaukei	Rural	0	0	0	0	0	0	0	0	1	1
iTaukei	Rural	0	0	0	0	0	0	0	0	1	1
iTaukei	Rural	0	0	0	0	0	0	0	0	1	1
iTaukei	Rural	0	0	0	0	0	0	0	0	1	1
iTaukei	Rural	0	0	0	0	0	0	0	0	1	1
iTaukei	Urban	0	0	0	0	0	0	0	0	1	1
iTaukei	Urban	0	0	0	0	0	0	0	0	1	1
iTaukei	Urban	0	0	0	0	0	0	0	0	1	1
iTaukei	Urban	0	0	0	0	0	0	0	0	1	1
iTaukei	Urban	0	0	0	0	0	0	0	0	1	1
iTaukei	Urban	0	0	0	0	0	0	0	0	1	1
iTaukei	Urban	0	0	0	0	0	0	0	0	1	1
iTaukei	Urban	0	0	0	0	0	0	0	0	1	1
iTaukei	Urban	0	0	0	0	0	0	0	0	1	1
other	Urban	0	0	0	0	0	0	0	0	1	1
iTaukei	Urban	0	0	0	0	0	0	0	0	1	1
iTaukei	Rural	0	0	0	0	0	0	0	0	1	1
iTaukei	Rural	0	0	0	0	0	0	0	0	1	1
iTaukei	Rural	0	0	0	0	0	0	0	0	1	1
iTaukei	Peri-urban	0	0	0	0	0	0	0	0	1	1
iTaukei	Rural	0	0	0	0	0	0	0	0	1	1
iTaukei	Peri-urban	0	0	0	0	0	0	0	0	1	1
iTaukei	Rural	0	0	0	0	0	0	0	0	1	1
iTaukei	Peri-urban	0	0	0	0	0	0	0	0	1	1
iTaukei	Peri-urban	0	0	0	0	0	0	0	0	1	1
iTaukei	Peri-urban	0	0	0	0	0	0	0	0	1	1
iTaukei	Peri-urban	0	0	0	0	0	0	0	0	1	1
iTaukei	Peri-urban	0	0	0	0	0	0	0	0	1	1
iTaukei	Peri-urban	0	0	0	0	0	0	0	0	1	1
iTaukei	Rural	0	0	0	0	0	0	0	0	1	1
iTaukei	Rural	0	0	0	0	0	0	0	0	1	1
iTaukei	Rural	0	0	0	0	0	0	0	0	1	1
iTaukei	Rural	0	0	0	0	0	0	0	0	1	1
iTaukei	Rural	0	0	0	0	0	0	0	0	1	1
iTaukei	Rural	0	0	0	0	0	0	0	0	1	1
iTaukei	Rural	0	0	0	0	0	0	0	0	1	1
iTaukei	Rural	0	0	0	0	0	0	0	0	1	1
iTaukei	Rural	0	0	0	0	0	0	0	0	1	1
iTaukei	Rural	0	0	0	0	0	0	0	0	1	1
iTaukei	Rural	0	0	0	0	0	0	0	0	1	1
iTaukei	Rural	0	0	0	0	0	0	0	0	1	1
iTaukei	Rural	0	0	0	0	0	0	0	0	1	1
iTaukei	Rural	0	0	0	0	0	0	0	0	1	1
iTaukei	Rural	0	0	0	0	0	0	0	0	1	1
iTaukei	Rural	0	0	0	0	0	0	0	0	1	1
iTaukei	Rural	0	0	0	0	0	0	0	0	1	1
iTaukei	Rural	0	0	0	0	0	0	0	0	1	1
iTaukei	Rural	0	0	0	0	0	0	0	0	1	1
iTaukei	Rural	0	0	0	0	0	0	0	0	1	1
iTaukei	Urban	0	0	0	0	0	0	0	0	1	1
iTaukei	Urban	0	0	0	0	0	0	0	0	1	1
iTaukei	Urban	0	0	0	0	0	0	0	0	1	1
iTaukei	Urban	0	0	0	0	0	0	0	0	1	1
other	Urban	0	0	0	0	0	0	0	0	1	1
other	Urban	0	0	0	0	0	0	0	0	1	1
other	Urban	0	0	0	0	0	0	0	0	1	1
iTaukei	Urban	0	0	0	0	0	0	0	0	1	1
iTaukei	Urban	0	0	0	0	0	0	0	0	1	1
other	Urban	0	0	0	0	0	0	0	0	1	1
iTaukei	Urban	0	0	0	0	0	0	0	0	1	1
iTaukei	Urban	0	0	0	0	0	0	0	0	1	1
iTaukei	Rural	0	0	0	0	0	0	0	0	1	1
iTaukei	Rural	0	0	0	0	0	0	0	0	1	1
other	Rural	0	0	0	0	0	0	0	0	1	1
iTaukei	Rural	0	0	0	0	0	0	0	0	1	1
other	Rural	0	0	0	0	0	0	0	0	1	1
iTaukei	Rural	0	0	0	0	0	0	0	0	1	1
iTaukei	Rural	0	0	0	0	0	0	0	0	1	1
iTaukei	Rural	0	0	0	0	0	0	0	0	1	1
iTaukei	Rural	0	0	0	0	0	0	0	0	1	1
iTaukei	Rural	0	0	0	0	0	0	0	0	1	1
iTaukei	Rural	0	0	0	0	0	0	0	0	1	1
iTaukei	Rural	0	0	0	0	0	0	0	0	1	1
iTaukei	Rural	0	0	0	0	0	0	0	0	1	1
iTaukei	Rural	0	0	0	0	0	0	0	0	1	1
iTaukei	Rural	0	0	0	0	0	0	0	0	1	1
iTaukei	Rural	0	0	0	0	0	0	0	0	1	1
iTaukei	Rural	0	0	0	0	0	0	0	0	1	1
iTaukei	Rural	0	0	0	0	0	0	0	0	1	1
iTaukei	Urban	0	0	0	0	0	0	0	0	1	1
other	Urban	0	0	0	0	0	0	0	0	1	1
other	Urban	0	0	0	0	0	0	0	0	1	1
other	Urban	0	0	0	0	0	0	0	0	1	1
iTaukei	Urban	0	0	0	0	0	0	0	0	1	1
other	Urban	0	0	0	0	0	0	0	0	1	1
other	Peri-urban	0	0	0	0	0	0	0	0	1	1
iTaukei	Peri-urban	0	0	0	0	0	0	0	0	1	1
iTaukei	Peri-urban	0	0	0	0	0	0	0	0	1	1
other	Peri-urban	0	0	0	0	0	0	0	0	1	1
iTaukei	Peri-urban	0	0	0	0	0	0	0	0	1	1
other	Peri-urban	0	0	0	0	0	0	0	0	1	1
other	Peri-urban	0	0	0	0	0	0	0	0	1	1
other	Peri-urban	0	0	0	0	0	0	0	0	1	1
iTaukei	Urban	0	0	0	0	0	0	0	0	1	1
iTaukei	Urban	0	0	0	0	0	0	0	0	1	1
iTaukei	Urban	0	0	0	0	0	0	0	0	1	1
iTaukei	Urban	0	0	0	0	0	0	0	0	1	1
iTaukei	Urban	0	0	0	0	0	0	0	0	1	1
iTaukei	Urban	0	0	0	0	0	0	0	0	1	1
iTaukei	Urban	0	0	0	0	0	0	0	0	1	1
iTaukei	Urban	0	0	0	0	0	0	0	0	1	1
iTaukei	Urban	0	0	0	0	0	0	0	0	1	1
iTaukei	Urban	0	0	0	0	0	0	0	0	1	1
iTaukei	Urban	0	0	0	0	0	0	0	0	1	1
iTaukei	Urban	0	0	0	0	0	0	0	0	1	1
iTaukei	Urban	0	0	0	0	0	0	0	0	1	1
iTaukei	Urban	0	0	0	0	0	0	0	0	1	1
iTaukei	Urban	0	0	0	0	0	0	0	0	1	1
iTaukei	Urban	0	0	0	0	0	0	0	0	1	1
iTaukei	Rural	0	0	0	0	0	0	0	0	1	1
iTaukei	Rural	0	0	0	0	0	0	0	0	1	1
other	Rural	0	0	0	0	0	0	0	0	1	1
iTaukei	Rural	0	0	0	0	0	0	0	0	1	1
iTaukei	Rural	0	0	0	0	0	0	0	0	1	1
iTaukei	Rural	0	0	0	0	0	0	0	0	1	1
iTaukei	Rural	0	0	0	0	0	0	0	0	1	1
iTaukei	Rural	0	0	0	0	0	0	0	0	1	1
iTaukei	Urban	0	0	0	0	0	0	0	0	1	1
iTaukei	Urban	0	0	0	0	0	0	0	0	1	1
other	Urban	0	0	0	0	0	0	0	0	1	1
other	Urban	0	0	0	0	0	0	0	0	1	1
iTaukei	Urban	0	0	0	0	0	0	0	0	1	1
other	Urban	0	0	0	0	0	0	0	0	1	1
iTaukei	Urban	0	0	0	0	0	0	0	0	1	1
other	Urban	0	0	0	0	0	0	0	0	1	1
other	Urban	0	0	0	0	0	0	0	0	1	1
iTaukei	Urban	0	0	0	0	0	0	0	0	1	1
iTaukei	Urban	0	0	0	0	0	0	0	0	1	1
other	Urban	0	0	0	0	0	0	0	0	1	1
iTaukei	Urban	0	0	0	0	0	0	0	0	1	1
other	Urban	0	0	0	0	0	0	0	0	1	1
iTaukei	Rural	0	0	0	0	0	0	0	0	1	1
other	Rural	0	0	0	0	0	0	0	0	1	1
iTaukei	Rural	0	0	0	0	0	0	0	0	1	1
iTaukei	Rural	0	0	0	0	0	0	0	0	1	1
other	Rural	0	0	0	0	0	0	0	0	1	1
other	Rural	0	0	0	0	0	0	0	0	1	1
iTaukei	Rural	0	0	0	0	0	0	0	0	1	1
iTaukei	Rural	0	0	0	0	0	0	0	0	1	1
iTaukei	Rural	0	0	0	0	0	0	0	0	1	1
iTaukei	Rural	0	0	0	0	0	0	0	0	1	1
iTaukei	Rural	0	0	0	0	0	0	0	0	1	1
iTaukei	Rural	0	0	0	0	0	0	0	0	1	1
iTaukei	Peri-urban	0	0	0	0	0	0	0	0	1	1
iTaukei	Rural	0	0	0	0	0	0	0	0	1	1
iTaukei	Rural	0	0	0	0	0	0	0	0	1	1
iTaukei	Peri-urban	0	0	0	0	0	0	0	0	1	1
iTaukei	Peri-urban	0	0	0	0	0	0	0	0	1	1
other	Peri-urban	0	0	0	0	0	0	0	0	1	1
iTaukei	Peri-urban	0	0	0	0	0	0	0	0	1	1
iTaukei	Peri-urban	0	0	0	0	0	0	0	0	1	1
other	Peri-urban	0	0	0	0	0	0	0	0	1	1
iTaukei	Rural	0	0	0	0	0	0	0	0	1	1
iTaukei	Rural	0	0	0	0	0	0	0	0	1	1
other	Peri-urban	0	0	0	0	0	0	0	0	1	1
other	Rural	0	0	0	0	0	0	0	0	1	1
other	Rural	0	0	0	0	0	0	0	0	1	1
iTaukei	Urban	0	0	0	0	0	0	0	0	1	1
iTaukei	Urban	0	0	0	0	0	0	0	0	1	1
iTaukei	Peri-urban	0	0	0	0	0	0	0	0	1	1
iTaukei	Rural	0	0	0	0	0	0	0	0	1	1
iTaukei	Rural	0	0	0	0	0	0	0	0	1	1
iTaukei	Urban	0	0	0	0	0	0	0	0	1	1
other	Urban	0	0	0	0	0	0	0	0	1	1
iTaukei	Urban	0	0	0	0	0	0	0	0	1	1
iTaukei	Urban	0	0	0	0	0	0	0	0	1	1
iTaukei	Rural	0	0	0	0	0	0	0	0	1	1
iTaukei	Rural	0	0	0	0	0	0	0	0	1	1
other	Rural	0	0	0	0	0	0	0	0	1	1
other	Rural	0	0	0	0	0	0	0	0	1	1
iTaukei	Rural	0	0	0	0	0	0	0	0	1	1
iTaukei	Urban	0	0	0	0	0	0	0	0	1	1
iTaukei	Urban	0	0	0	0	0	0	0	0	1	1
iTaukei	Urban	0	0	0	0	0	0	0	0	1	1
iTaukei	Urban	0	0	0	0	0	0	0	0	1	1
iTaukei	Urban	0	0	0	0	0	0	0	0	1	1
iTaukei	Urban	0	0	0	0	0	0	0	0	1	1
iTaukei	Urban	0	0	0	0	0	0	0	0	1	1
iTaukei	Urban	0	0	0	0	0	0	0	0	1	1
iTaukei	Urban	0	0	0	0	0	0	0	0	1	1
iTaukei	Urban	0	0	0	0	0	0	0	0	1	1
other	Urban	0	0	0	0	0	0	0	0	1	1
other	Urban	0	0	0	0	0	0	0	0	1	1
iTaukei	Urban	0	0	0	0	0	0	0	0	1	1
other	Rural	0	0	0	0	0	0	0	0	1	1
other	Rural	0	0	0	0	0	0	0	0	1	1
other	Rural	0	0	0	0	0	0	0	0	1	1
other	Rural	0	0	0	0	0	0	0	0	1	1
iTaukei	Rural	0	0	0	0	0	0	0	0	1	1
other	Rural	0	0	0	0	0	0	0	0	1	1
other	Rural	0	0	0	0	0	0	0	0	1	1
iTaukei	Urban	0	0	0	0	0	0	0	0	1	1
other	Urban	0	0	0	0	0	0	0	0	1	1
other	Peri-urban	0	0	0	0	0	0	0	0	1	1
other	Peri-urban	0	0	0	0	0	0	0	0	1	1
iTaukei	Peri-urban	0	0	0	0	0	0	0	0	1	1
other	Peri-urban	0	0	0	0	0	0	0	0	1	1
other	Peri-urban	0	0	0	0	0	0	0	0	1	1
iTaukei	Peri-urban	0	0	0	0	0	0	0	0	1	1
other	Peri-urban	0	0	0	0	0	0	0	0	1	1
other	Peri-urban	0	0	0	0	0	0	0	0	1	1
iTaukei	Peri-urban	0	0	0	0	0	0	0	0	1	1
other	Peri-urban	0	0	0	0	0	0	0	0	1	1
iTaukei	Peri-urban	0	0	0	0	0	0	0	0	1	1
other	Peri-urban	0	0	0	0	0	0	0	0	1	1
other	Peri-urban	0	0	0	0	0	0	0	0	1	1
other	Rural	0	0	0	0	0	0	0	0	1	1
iTaukei	Urban	0	0	0	0	0	0	0	0	1	1
iTaukei	Urban	0	0	0	0	0	0	0	0	1	1
iTaukei	Urban	0	0	0	0	0	0	0	0	1	1
other	Urban	0	0	0	0	0	0	0	0	1	1
iTaukei	Rural	0	0	0	0	0	0	0	0	1	1
iTaukei	Rural	0	0	0	0	0	0	0	0	1	1
iTaukei	Rural	0	0	0	0	0	0	0	0	1	1
other	Peri-urban	0	0	0	0	0	0	0	0	1	1
other	Peri-urban	0	0	0	0	0	0	0	0	1	1
other	Peri-urban	0	0	0	0	0	0	0	0	1	1
other	Peri-urban	0	0	0	0	0	0	0	0	1	1
iTaukei	Peri-urban	0	0	0	0	0	0	0	0	1	1
other	Peri-urban	0	0	0	0	0	0	0	0	1	1
other	Peri-urban	0	0	0	0	0	0	0	0	1	1
other	Peri-urban	0	0	0	0	0	0	0	0	1	1
other	Peri-urban	0	0	0	0	0	0	0	0	1	1
iTaukei	Rural	0	0	0	0	0	0	0	0	1	1
iTaukei	Rural	0	0	0	0	0	0	0	0	1	1
iTaukei	Rural	0	0	0	0	0	0	0	0	1	1
iTaukei	Rural	0	0	0	0	0	0	0	0	1	1
iTaukei	Rural	0	0	0	0	0	0	0	0	1	1
iTaukei	Peri-urban	0	0	0	0	0	0	0	0	1	1
iTaukei	Peri-urban	0	0	0	0	0	0	0	0	1	1
iTaukei	Peri-urban	0	0	0	0	0	0	0	0	1	1
other	Peri-urban	0	0	0	0	0	0	0	0	1	1
iTaukei	Peri-urban	0	0	0	0	0	0	0	0	1	1
other	Peri-urban	0	0	0	0	0	0	0	0	1	1
iTaukei	Peri-urban	0	0	0	0	0	0	0	0	1	1
iTaukei	Peri-urban	0	0	0	0	0	0	0	0	1	1
iTaukei	Urban	0	0	0	0	0	0	0	0	1	1
iTaukei	Urban	0	0	0	0	0	0	0	0	1	1
iTaukei	Urban	0	0	0	0	0	0	0	0	1	1
iTaukei	Urban	0	0	0	0	0	0	0	0	1	1
iTaukei	Urban	0	0	0	0	0	0	0	0	1	1
iTaukei	Urban	0	0	0	0	0	0	0	0	1	1
iTaukei	Urban	0	0	0	0	0	0	0	0	1	1
iTaukei	Urban	0	0	0	0	0	0	0	0	1	1
iTaukei	Rural	0	0	0	0	0	0	0	0	1	1
iTaukei	Rural	0	0	0	0	0	0	0	0	1	1
iTaukei	Rural	0	0	0	0	0	0	0	0	1	1
iTaukei	Rural	0	0	0	0	0	0	0	0	1	1
iTaukei	Rural	0	0	0	0	0	0	0	0	1	1
iTaukei	Rural	0	0	0	0	0	0	0	0	1	1
iTaukei	Rural	0	0	0	0	0	0	0	0	1	1
iTaukei	Urban	0	0	0	0	0	0	0	0	1	1
iTaukei	Urban	0	0	0	0	0	0	0	0	1	1
iTaukei	Urban	0	0	0	0	0	0	0	0	1	1
iTaukei	Urban	0	0	0	0	0	0	0	0	1	1
iTaukei	Urban	0	0	0	0	0	0	0	0	1	1
iTaukei	Rural	0	0	0	0	0	0	0	0	1	1
iTaukei	Rural	0	0	0	0	0	0	0	0	1	1
iTaukei	Rural	0	0	0	0	0	0	0	0	1	1
iTaukei	Rural	0	0	0	0	0	0	0	0	1	1
iTaukei	Rural	0	0	0	0	0	0	0	0	1	1
iTaukei	Rural	0	0	0	0	0	0	0	0	1	1
iTaukei	Rural	0	0	0	0	0	0	0	0	1	1
iTaukei	Rural	0	0	0	0	0	0	0	0	1	1
iTaukei	Rural	0	0	0	0	0	0	0	0	1	1
iTaukei	Urban	0	0	0	0	0	0	0	0	1	0
other	Urban	0	0	0	0	0	0	0	0	1	0
other	Urban	0	0	0	0	0	0	0	0	1	0
iTaukei	Urban	0	0	0	0	0	0	0	0	1	0
iTaukei	Urban	0	0	0	0	0	0	0	0	1	0
iTaukei	Peri-urban	0	0	0	0	0	0	0	0	1	0
iTaukei	Peri-urban	0	0	0	0	0	0	0	0	1	0
iTaukei	Peri-urban	0	0	0	0	0	0	0	0	1	0
other	Urban	0	0	0	0	0	0	0	0	1	0
iTaukei	Urban	0	0	0	0	0	0	0	0	1	0
iTaukei	Urban	0	0	0	0	0	0	0	0	1	0
iTaukei	Urban	0	0	0	0	0	0	0	0	1	0
iTaukei	Rural	0	0	0	0	0	0	0	0	1	0
iTaukei	Urban	0	0	0	0	0	0	0	0	1	0
other	Urban	0	0	0	0	0	0	0	0	1	0
iTaukei	Urban	0	0	0	0	0	0	0	0	1	0
iTaukei	Urban	0	0	0	0	0	0	0	0	1	0
other	Urban	0	0	0	0	0	0	0	0	1	0
other	Peri-urban	0	0	0	0	0	0	0	0	1	0
other	Peri-urban	0	0	0	0	0	0	0	0	1	0
other	Urban	0	0	0	0	0	0	0	0	1	0
iTaukei	Urban	0	0	0	0	0	0	0	0	1	0
other	Urban	0	0	0	0	0	0	0	0	1	0
iTaukei	Urban	0	0	0	0	0	0	0	0	1	0
iTaukei	Rural	0	0	0	0	0	0	0	0	1	0
iTaukei	Rural	0	0	0	0	0	0	0	0	1	0
iTaukei	Rural	0	0	0	0	0	0	0	0	1	0
iTaukei	Rural	0	0	0	0	0	0	0	0	1	0
iTaukei	Rural	0	0	0	0	0	0	0	0	1	0
other	Rural	0	0	0	0	0	0	0	0	1	0
other	Rural	0	0	0	0	0	0	0	0	1	0
other	Rural	0	0	0	0	0	0	0	0	1	0
other	Urban	0	0	0	0	0	0	0	0	1	0
iTaukei	Peri-urban	0	0	0	0	0	0	0	0	1	0
other	Urban	0	0	0	0	0	0	0	0	1	0
other	Urban	0	0	0	0	0	0	0	0	1	0
other	Peri-urban	0	0	0	0	0	0	0	0	1	0
other	Urban	0	0	0	0	0	0	0	0	0	1
iTaukei	Urban	0	0	0	0	0	0	0	0	0	1
iTaukei	Rural	0	0	0	0	0	0	0	0	0	1
iTaukei	Rural	0	0	0	0	0	0	0	0	0	1
iTaukei	Rural	0	0	0	0	0	0	0	0	0	1
iTaukei	Rural	0	0	0	0	0	0	0	0	0	1
iTaukei	Rural	0	0	0	0	0	0	0	0	0	1
iTaukei	Rural	0	0	0	0	0	0	0	0	0	1
iTaukei	Rural	0	0	0	0	0	0	0	0	0	1
iTaukei	Rural	0	0	0	0	0	0	0	0	0	1
iTaukei	Rural	0	0	0	0	0	0	0	0	0	1
iTaukei	Rural	0	0	0	0	0	0	0	0	0	1
iTaukei	Rural	0	0	0	0	0	0	0	0	0	1
iTaukei	Rural	0	0	0	0	0	0	0	0	0	1
iTaukei	Rural	0	0	0	0	0	0	0	0	0	1
iTaukei	Rural	0	0	0	0	0	0	0	0	0	1
iTaukei	Rural	0	0	0	0	0	0	0	0	0	1
iTaukei	Rural	0	0	0	0	0	0	0	0	0	1
iTaukei	Rural	0	0	0	0	0	0	0	0	0	1
other	Rural	0	0	0	0	0	0	0	0	0	1
iTaukei	Rural	0	0	0	0	0	0	0	0	0	1
iTaukei	Rural	0	0	0	0	0	0	0	0	0	1
iTaukei	Rural	0	0	0	0	0	0	0	0	0	1
iTaukei	Rural	0	0	0	0	0	0	0	0	0	1
iTaukei	Rural	0	0	0	0	0	0	0	0	0	1
iTaukei	Rural	0	0	0	0	0	0	0	0	0	1
iTaukei	Rural	0	0	0	0	0	0	0	0	0	1
iTaukei	Rural	0	0	0	0	0	0	0	0	0	1
iTaukei	Rural	0	0	0	0	0	0	0	0	0	1
iTaukei	Rural	0	0	0	0	0	0	0	0	0	1
iTaukei	Rural	0	0	0	0	0	0	0	0	0	1
iTaukei	Rural	0	0	0	0	0	0	0	0	0	1
iTaukei	Rural	0	0	0	0	0	0	0	0	0	1
iTaukei	Rural	0	0	0	0	0	0	0	0	0	1
iTaukei	Rural	0	0	0	0	0	0	0	0	0	1
iTaukei	Rural	0	0	0	0	0	0	0	0	0	1
iTaukei	Rural	0	0	0	0	0	0	0	0	0	1
iTaukei	Rural	0	0	0	0	0	0	0	0	0	1
iTaukei	Peri-urban	0	0	0	0	0	0	0	0	0	1
iTaukei	Peri-urban	0	0	0	0	0	0	0	0	0	1
other	Peri-urban	0	0	0	0	0	0	0	0	0	1
iTaukei	Peri-urban	0	0	0	0	0	0	0	0	0	1
iTaukei	Rural	0	0	0	0	0	0	0	0	0	1
iTaukei	Rural	0	0	0	0	0	0	0	0	0	1
iTaukei	Rural	0	0	0	0	0	0	0	0	0	1
iTaukei	Rural	0	0	0	0	0	0	0	0	0	1
iTaukei	Rural	0	0	0	0	0	0	0	0	0	1
other	Rural	0	0	0	0	0	0	0	0	0	1
iTaukei	Rural	0	0	0	0	0	0	0	0	0	1
other	Rural	0	0	0	0	0	0	0	0	0	1
iTaukei	Urban	0	0	0	0	0	0	0	0	0	1
other	Urban	0	0	0	0	0	0	0	0	0	1
iTaukei	Urban	0	0	0	0	0	0	0	0	0	1
iTaukei	Rural	0	0	0	0	0	0	0	0	0	1
iTaukei	Rural	0	0	0	0	0	0	0	0	0	1
other	Urban	0	0	0	0	0	0	0	0	0	0
iTaukei	Peri-urban	0	0	0	0	0	0	0	0	0	0
iTaukei	Urban	0	0	0	0	0	0	0	0	0	0
other	Urban	0	0	0	0	0	0	0	0	0	0
iTaukei	Urban	0	0	0	0	0	0	0	0	0	0
iTaukei	Urban	0	0	0	0	0	0	0	0	0	0
iTaukei	Urban	0	0	0	0	0	0	0	0	0	0
other	Urban	0	0	0	0	0	0	0	0	0	0
other	Urban	0	0	0	0	0	0	0	0	0	0
other	Rural	0	0	0	0	0	0	0	0	0	0
iTaukei	Rural	0	0	0	0	0	0	0	0	0	0
iTaukei	Rural	0	0	0	0	0	0	0	0	0	0
iTaukei	Rural	0	0	0	0	0	0	0	0	0	0
iTaukei	Rural	0	0	0	0	0	0	0	0	0	0
iTaukei	Rural	0	0	0	0	0	0	0	0	0	0
iTaukei	Rural	0	0	0	0	0	0	0	0	0	0
iTaukei	Rural	0	0	0	0	0	0	0	0	0	0
iTaukei	Rural	0	0	0	0	0	0	0	0	0	0
iTaukei	Rural	0	0	0	0	0	0	0	0	0	0
iTaukei	Rural	0	0	0	0	0	0	0	0	0	0
iTaukei	Peri-urban	0	0	0	0	0	0	0	0	0	0
other	Peri-urban	0	0	0	0	0	0	0	0	0	0
iTaukei	Peri-urban	0	0	0	0	0	0	0	0	0	0
iTaukei	Urban	0	0	0	0	0	0	0	0	0	0
other	Urban	0	0	0	0	0	0	0	0	0	0
iTaukei	Urban	0	0	0	0	0	0	0	0	0	0
iTaukei	Urban	0	0	0	0	0	0	0	0	0	0
other	Urban	0	0	0	0	0	0	0	0	0	0
other	Urban	0	0	0	0	0	0	0	0	0	0
other	Urban	0	0	0	0	0	0	0	0	0	0
other	Urban	0	0	0	0	0	0	0	0	0	0
iTaukei	Urban	0	0	0	0	0	0	0	0	0	0
iTaukei	Rural	0	0	0	0	0	0	0	0	0	0
iTaukei	Peri-urban	0	0	0	0	0	0	0	0	0	0
other	Peri-urban	0	0	0	0	0	0	0	0	0	0
iTaukei	Urban	0	0	0	0	0	0	0	0	0	0

## Sheet: travel
eth	age	travelled_last_week
iTaukei	01-04	0
iTaukei	01-04	0
other	01-04	0
iTaukei	01-04	0
other	01-04	0
iTaukei	01-04	0
iTaukei	01-04	0
iTaukei	01-04	0
other	01-04	0
other	01-04	0
iTaukei	01-04	0
iTaukei	01-04	0
iTaukei	01-04	0
iTaukei	01-04	0
iTaukei	01-04	0
iTaukei	01-04	0
iTaukei	01-04	0
iTaukei	01-04	0
iTaukei	01-04	0
iTaukei	01-04	0
iTaukei	01-04	0
iTaukei	01-04	0
iTaukei	01-04	0
iTaukei	01-04	0
iTaukei	01-04	0
iTaukei	01-04	0
other	01-04	0
iTaukei	01-04	0
iTaukei	01-04	0
iTaukei	01-04	0
iTaukei	01-04	0
iTaukei	01-04	0
iTaukei	01-04	0
iTaukei	01-04	0
other	01-04	0
other	01-04	0
iTaukei	01-04	0
iTaukei	01-04	0
iTaukei	01-04	0
iTaukei	01-04	0
iTaukei	01-04	0
other	01-04	0
iTaukei	01-04	0
other	01-04	0
iTaukei	01-04	0
iTaukei	01-04	0
other	01-04	0
iTaukei	01-04	0
iTaukei	01-04	0
iTaukei	01-04	0
iTaukei	01-04	0
iTaukei	01-04	0
iTaukei	01-04	0
iTaukei	01-04	0
other	05-09	0
other	05-09	0
other	05-09	0
iTaukei	05-09	0
iTaukei	05-09	0
iTaukei	05-09	0
iTaukei	05-09	0
iTaukei	05-09	0
iTaukei	05-09	0
iTaukei	05-09	0
other	05-09	0
iTaukei	05-09	0
iTaukei	05-09	0
iTaukei	05-09	0
iTaukei	05-09	0
iTaukei	05-09	0
iTaukei	05-09	0
iTaukei	05-09	0
iTaukei	05-09	0
iTaukei	05-09	0
iTaukei	05-09	0
iTaukei	05-09	0
iTaukei	05-09	0
iTaukei	05-09	0
iTaukei	05-09	0
iTaukei	05-09	0
iTaukei	05-09	0
iTaukei	05-09	0
iTaukei	05-09	0
iTaukei	05-09	0
other	05-09	0
iTaukei	05-09	0
iTaukei	05-09	0
other	05-09	0
iTaukei	05-09	0
iTaukei	05-09	0
iTaukei	05-09	0
iTaukei	05-09	0
iTaukei	05-09	0
iTaukei	05-09	0
other	05-09	0
iTaukei	05-09	0
iTaukei	05-09	0
iTaukei	05-09	0
iTaukei	05-09	0
iTaukei	05-09	0
iTaukei	05-09	0
iTaukei	05-09	0
iTaukei	05-09	0
other	05-09	0
iTaukei	05-09	0
other	05-09	0
iTaukei	05-09	0
other	05-09	0
iTaukei	05-09	0
iTaukei	05-09	0
iTaukei	05-09	0
other	05-09	0
other	05-09	0
other	05-09	0
iTaukei	05-09	0
iTaukei	05-09	0
iTaukei	05-09	0
iTaukei	05-09	0
iTaukei	05-09	0
iTaukei	05-09	0
iTaukei	05-09	0
iTaukei	05-09	0
iTaukei	05-09	0
iTaukei	05-09	0
iTaukei	05-09	0
iTaukei	10-14	0
iTaukei	10-14	0
other	10-14	0
iTaukei	10-14	0
iTaukei	10-14	0
iTaukei	10-14	0
iTaukei	10-14	0
iTaukei	10-14	0
iTaukei	10-14	0
iTaukei	10-14	0
iTaukei	10-14	0
iTaukei	10-14	0
iTaukei	10-14	0
iTaukei	10-14	0
iTaukei	10-14	0
iTaukei	10-14	0
iTaukei	10-14	0
iTaukei	10-14	0
iTaukei	10-14	0
iTaukei	10-14	0
iTaukei	10-14	0
iTaukei	10-14	0
iTaukei	10-14	0
iTaukei	10-14	0
iTaukei	10-14	0
iTaukei	10-14	0
iTaukei	10-14	0
iTaukei	10-14	0
iTaukei	10-14	0
other	10-14	0
other	10-14	0
other	10-14	0
iTaukei	10-14	0
iTaukei	10-14	0
iTaukei	10-14	0
iTaukei	10-14	0
iTaukei	10-14	0
iTaukei	10-14	0
iTaukei	10-14	0
iTaukei	10-14	0
iTaukei	10-14	0
iTaukei	10-14	0
iTaukei	10-14	0
iTaukei	10-14	0
iTaukei	10-14	0
iTaukei	10-14	0
iTaukei	10-14	0
other	10-14	0
other	10-14	0
iTaukei	10-14	0
iTaukei	10-14	0
iTaukei	10-14	0
iTaukei	10-14	0
iTaukei	10-14	0
iTaukei	10-14	0
other	10-14	0
other	10-14	0
other	10-14	0
iTaukei	10-14	0
other	10-14	0
iTaukei	10-14	0
iTaukei	10-14	0
iTaukei	10-14	0
iTaukei	10-14	0
iTaukei	10-14	0
other	15-19	0
iTaukei	15-19	0
other	15-19	0
other	15-19	0
iTaukei	15-19	0
iTaukei	15-19	0
iTaukei	15-19	0
iTaukei	15-19	0
iTaukei	15-19	0
iTaukei	15-19	0
iTaukei	15-19	0
iTaukei	15-19	0
iTaukei	15-19	0
iTaukei	15-19	0
iTaukei	15-19	0
iTaukei	15-19	0
iTaukei	15-19	0
iTaukei	15-19	0
iTaukei	15-19	0
iTaukei	15-19	0
iTaukei	15-19	0
iTaukei	15-19	0
iTaukei	15-19	0
iTaukei	15-19	0
iTaukei	15-19	0
iTaukei	15-19	0
iTaukei	15-19	0
iTaukei	15-19	0
iTaukei	15-19	0
iTaukei	15-19	0
iTaukei	15-19	0
other	15-19	0
iTaukei	15-19	0
iTaukei	15-19	0
other	15-19	0
iTaukei	15-19	0
iTaukei	15-19	0
iTaukei	15-19	0
iTaukei	15-19	0
iTaukei	15-19	0
iTaukei	15-19	0
iTaukei	15-19	0
iTaukei	15-19	0
iTaukei	15-19	0
other	15-19	0
iTaukei	15-19	0
iTaukei	15-19	0
iTaukei	15-19	0
other	15-19	0
iTaukei	15-19	0
other	15-19	0
other	15-19	0
iTaukei	15-19	0
iTaukei	15-19	0
iTaukei	15-19	0
other	15-19	0
iTaukei	15-19	0
other	15-19	0
iTaukei	15-19	0
iTaukei	15-19	0
iTaukei	15-19	0
iTaukei	15-19	0
iTaukei	15-19	0
iTaukei	20-24	0
iTaukei	20-24	0
other	20-24	0
iTaukei	20-24	0
iTaukei	20-24	0
iTaukei	20-24	0
iTaukei	20-24	0
iTaukei	20-24	0
iTaukei	20-24	0
iTaukei	20-24	0
iTaukei	20-24	0
iTaukei	20-24	0
other	20-24	0
iTaukei	20-24	0
iTaukei	20-24	0
iTaukei	20-24	0
iTaukei	20-24	0
iTaukei	20-24	0
iTaukei	20-24	0
iTaukei	20-24	0
iTaukei	20-24	0
iTaukei	20-24	0
iTaukei	20-24	0
iTaukei	20-24	0
iTaukei	20-24	0
iTaukei	20-24	0
iTaukei	20-24	0
other	20-24	0
iTaukei	20-24	0
iTaukei	20-24	0
iTaukei	20-24	0
iTaukei	20-24	0
iTaukei	20-24	0
other	20-24	0
iTaukei	20-24	0
iTaukei	20-24	0
iTaukei	20-24	0
iTaukei	20-24	0
iTaukei	20-24	0
iTaukei	20-24	0
iTaukei	20-24	0
iTaukei	20-24	0
iTaukei	20-24	0
iTaukei	20-24	0
iTaukei	20-24	0
iTaukei	20-24	0
iTaukei	20-24	0
iTaukei	20-24	0
other	20-24	0
iTaukei	20-24	0
iTaukei	20-24	0
iTaukei	20-24	0
iTaukei	20-24	0
other	20-24	0
other	20-24	0
iTaukei	20-24	0
other	20-24	0
iTaukei	20-24	0
iTaukei	20-24	0
other	20-24	0
iTaukei	20-24	0
other	20-24	0
iTaukei	20-24	0
iTaukei	20-24	0
iTaukei	20-24	0
iTaukei	20-24	0
iTaukei	20-24	0
other	20-24	0
iTaukei	20-24	0
iTaukei	20-24	0
iTaukei	20-24	0
iTaukei	20-24	0
iTaukei	20-24	0
iTaukei	20-24	0
iTaukei	20-24	0
iTaukei	20-24	0
iTaukei	20-24	0
iTaukei	20-24	0
iTaukei	20-24	0
iTaukei	20-24	0
other	25-29	0
other	25-29	0
iTaukei	25-29	0
iTaukei	25-29	0
iTaukei	25-29	0
iTaukei	25-29	0
iTaukei	25-29	0
iTaukei	25-29	0
iTaukei	25-29	0
iTaukei	25-29	0
iTaukei	25-29	0
iTaukei	25-29	0
iTaukei	25-29	0
iTaukei	25-29	0
iTaukei	25-29	0
iTaukei	25-29	0
iTaukei	25-29	0
iTaukei	25-29	0
iTaukei	25-29	0
other	25-29	0
iTaukei	25-29	0
iTaukei	25-29	0
iTaukei	25-29	0
iTaukei	25-29	0
iTaukei	25-29	0
iTaukei	25-29	0
iTaukei	25-29	0
iTaukei	25-29	0
iTaukei	25-29	0
iTaukei	25-29	0
iTaukei	25-29	0
iTaukei	25-29	0
iTaukei	25-29	0
iTaukei	25-29	0
iTaukei	25-29	0
iTaukei	25-29	0
iTaukei	25-29	0
iTaukei	25-29	0
iTaukei	25-29	0
iTaukei	25-29	0
iTaukei	25-29	0
iTaukei	25-29	0
iTaukei	25-29	0
other	25-29	0
iTaukei	25-29	0
iTaukei	25-29	0
iTaukei	25-29	0
iTaukei	25-29	0
iTaukei	25-29	0
iTaukei	25-29	0
iTaukei	25-29	0
iTaukei	25-29	0
iTaukei	25-29	0
iTaukei	25-29	0
iTaukei	25-29	0
iTaukei	25-29	0
iTaukei	25-29	0
iTaukei	25-29	0
other	25-29	0
other	25-29	0
other	25-29	0
other	25-29	0
other	25-29	0
other	25-29	0
iTaukei	25-29	0
iTaukei	25-29	0
iTaukei	25-29	0
iTaukei	25-29	0
iTaukei	25-29	0
iTaukei	25-29	0
iTaukei	25-29	0
iTaukei	25-29	0
other	25-29	0
iTaukei	25-29	0
iTaukei	25-29	0
iTaukei	25-29	0
other	25-29	0
iTaukei	25-29	0
other	25-29	0
iTaukei	25-29	0
iTaukei	25-29	0
iTaukei	25-29	0
other	25-29	0
iTaukei	25-29	0
iTaukei	25-29	0
iTaukei	25-29	0
iTaukei	25-29	0
iTaukei	25-29	0
iTaukei	25-29	0
iTaukei	30-34	0
other	30-34	0
other	30-34	0
iTaukei	30-34	0
iTaukei	30-34	0
iTaukei	30-34	0
other	30-34	0
iTaukei	30-34	0
iTaukei	30-34	0
iTaukei	30-34	0
iTaukei	30-34	0
iTaukei	30-34	0
iTaukei	30-34	0
iTaukei	30-34	0
iTaukei	30-34	0
iTaukei	30-34	0
iTaukei	30-34	0
iTaukei	30-34	0
iTaukei	30-34	0
other	30-34	0
iTaukei	30-34	0
iTaukei	30-34	0
iTaukei	30-34	0
other	30-34	0
iTaukei	30-34	0
iTaukei	30-34	0
iTaukei	30-34	0
iTaukei	30-34	0
iTaukei	30-34	0
iTaukei	30-34	0
iTaukei	30-34	0
iTaukei	30-34	0
other	30-34	0
iTaukei	30-34	0
iTaukei	30-34	0
iTaukei	30-34	0
iTaukei	30-34	0
iTaukei	30-34	0
other	30-34	0
iTaukei	30-34	0
iTaukei	30-34	0
iTaukei	30-34	0
iTaukei	30-34	0
iTaukei	30-34	0
other	30-34	0
iTaukei	30-34	0
other	30-34	0
iTaukei	30-34	0
iTaukei	30-34	0
iTaukei	30-34	0
iTaukei	30-34	0
iTaukei	30-34	0
other	30-34	0
other	30-34	0
other	30-34	0
iTaukei	30-34	0
other	30-34	0
other	30-34	0
other	30-34	0
other	30-34	0
other	30-34	0
other	30-34	0
other	30-34	0
iTaukei	30-34	0
other	30-34	0
iTaukei	30-34	0
other	30-34	0
other	30-34	0
other	30-34	0
iTaukei	30-34	0
iTaukei	30-34	0
iTaukei	30-34	0
other	35-39	0
iTaukei	35-39	0
iTaukei	35-39	0
iTaukei	35-39	0
iTaukei	35-39	0
other	35-39	0
iTaukei	35-39	0
iTaukei	35-39	0
iTaukei	35-39	0
iTaukei	35-39	0
iTaukei	35-39	0
iTaukei	35-39	0
iTaukei	35-39	0
iTaukei	35-39	0
iTaukei	35-39	0
iTaukei	35-39	0
iTaukei	35-39	0
iTaukei	35-39	0
iTaukei	35-39	0
iTaukei	35-39	0
iTaukei	35-39	0
iTaukei	35-39	0
iTaukei	35-39	0
iTaukei	35-39	0
iTaukei	35-39	0
iTaukei	35-39	0
iTaukei	35-39	0
other	35-39	0
iTaukei	35-39	0
iTaukei	35-39	0
iTaukei	35-39	0
iTaukei	35-39	0
iTaukei	35-39	0
other	35-39	0
iTaukei	35-39	0
iTaukei	35-39	0
iTaukei	35-39	0
iTaukei	35-39	0
iTaukei	35-39	0
iTaukei	35-39	0
iTaukei	35-39	0
iTaukei	35-39	0
iTaukei	35-39	0
iTaukei	35-39	0
iTaukei	35-39	0
other	35-39	0
other	35-39	0
other	35-39	0
other	35-39	0
iTaukei	35-39	0
other	35-39	0
other	35-39	0
other	35-39	0
iTaukei	35-39	0
iTaukei	35-39	0
iTaukei	35-39	0
iTaukei	35-39	0
iTaukei	35-39	0
iTaukei	40-44	0
iTaukei	40-44	0
iTaukei	40-44	0
iTaukei	40-44	0
iTaukei	40-44	0
iTaukei	40-44	0
iTaukei	40-44	0
iTaukei	40-44	0
iTaukei	40-44	0
other	40-44	0
iTaukei	40-44	0
iTaukei	40-44	0
other	40-44	0
iTaukei	40-44	0
iTaukei	40-44	0
iTaukei	40-44	0
iTaukei	40-44	0
other	40-44	0
iTaukei	40-44	0
iTaukei	40-44	0
iTaukei	40-44	0
iTaukei	40-44	0
other	40-44	0
iTaukei	40-44	0
iTaukei	40-44	0
iTaukei	40-44	0
iTaukei	40-44	0
iTaukei	40-44	0
iTaukei	40-44	0
iTaukei	40-44	0
other	40-44	0
other	40-44	0
iTaukei	40-44	0
other	40-44	0
iTaukei	40-44	0
iTaukei	40-44	0
other	40-44	0
iTaukei	40-44	0
other	40-44	0
iTaukei	40-44	0
iTaukei	40-44	0
iTaukei	40-44	0
iTaukei	40-44	0
iTaukei	40-44	0
other	45-49	0
iTaukei	45-49	0
iTaukei	45-49	0
iTaukei	45-49	0
iTaukei	45-49	0
other	45-49	0
iTaukei	45-49	0
iTaukei	45-49	0
iTaukei	45-49	0
iTaukei	45-49	0
iTaukei	45-49	0
iTaukei	45-49	0
iTaukei	45-49	0
iTaukei	45-49	0
iTaukei	45-49	0
iTaukei	45-49	0
other	45-49	0
iTaukei	45-49	0
other	45-49	0
iTaukei	45-49	0
iTaukei	45-49	0
iTaukei	45-49	0
iTaukei	45-49	0
iTaukei	45-49	0
other	45-49	0
iTaukei	45-49	0
iTaukei	45-49	0
iTaukei	45-49	0
iTaukei	45-49	0
other	45-49	0
other	45-49	0
iTaukei	45-49	0
iTaukei	45-49	0
iTaukei	45-49	0
iTaukei	45-49	0
other	45-49	0
other	45-49	0
other	45-49	0
other	45-49	0
other	45-49	0
other	45-49	0
other	45-49	0
other	45-49	0
iTaukei	45-49	0
iTaukei	45-49	0
iTaukei	50-54	0
iTaukei	50-54	0
other	50-54	0
iTaukei	50-54	0
iTaukei	50-54	0
iTaukei	50-54	0
iTaukei	50-54	0
iTaukei	50-54	0
iTaukei	50-54	0
iTaukei	50-54	0
iTaukei	50-54	0
iTaukei	50-54	0
iTaukei	50-54	0
iTaukei	50-54	0
iTaukei	50-54	0
iTaukei	50-54	0
other	50-54	0
iTaukei	50-54	0
iTaukei	50-54	0
other	50-54	0
other	50-54	0
iTaukei	50-54	0
iTaukei	50-54	0
iTaukei	50-54	0
iTaukei	50-54	0
iTaukei	50-54	0
iTaukei	50-54	0
other	50-54	0
other	50-54	0
other	50-54	0
iTaukei	50-54	0
other	50-54	0
iTaukei	50-54	0
iTaukei	50-54	0
iTaukei	50-54	0
iTaukei	50-54	0
other	50-54	0
iTaukei	50-54	0
iTaukei	50-54	0
iTaukei	50-54	0
other	50-54	0
other	50-54	0
other	50-54	0
iTaukei	50-54	0
other	50-54	0
iTaukei	50-54	0
iTaukei	50-54	0
iTaukei	50-54	0
iTaukei	55-59	0
other	55-59	0
other	55-59	0
other	55-59	0
iTaukei	55-59	0
other	55-59	0
other	55-59	0
other	55-59	0
iTaukei	55-59	0
other	55-59	0
iTaukei	55-59	0
other	55-59	0
iTaukei	55-59	0
iTaukei	55-59	0
iTaukei	55-59	0
iTaukei	55-59	0
iTaukei	55-59	0
iTaukei	55-59	0
iTaukei	55-59	0
iTaukei	55-59	0
iTaukei	55-59	0
iTaukei	55-59	0
iTaukei	55-59	0
iTaukei	55-59	0
iTaukei	55-59	0
iTaukei	55-59	0
iTaukei	55-59	0
other	55-59	0
iTaukei	55-59	0
other	55-59	0
other	55-59	0
other	55-59	0
iTaukei	55-59	0
iTaukei	55-59	0
iTaukei	55-59	0
iTaukei	55-59	0
other	55-59	0
iTaukei	55-59	0
iTaukei	55-59	0
other	55-59	0
other	55-59	0
other	55-59	0
iTaukei	55-59	0
other	55-59	0
iTaukei	55-59	0
iTaukei	55-59	0
other	60-64	0
other	60-64	0
iTaukei	60-64	0
iTaukei	60-64	0
iTaukei	60-64	0
iTaukei	60-64	0
iTaukei	60-64	0
iTaukei	60-64	0
iTaukei	60-64	0
iTaukei	60-64	0
iTaukei	60-64	0
iTaukei	60-64	0
iTaukei	60-64	0
iTaukei	60-64	0
iTaukei	60-64	0
iTaukei	60-64	0
iTaukei	60-64	0
iTaukei	60-64	0
iTaukei	60-64	0
other	60-64	0
other	60-64	0
other	60-64	0
other	60-64	0
other	60-64	0
iTaukei	60-64	0
iTaukei	60-64	0
other	60-64	0
other	60-64	0
other	60-64	0
other	60-64	0
other	60-64	0
iTaukei	60-64	0
iTaukei	60-64	0
iTaukei	65-69	0
iTaukei	65-69	0
iTaukei	65-69	0
iTaukei	65-69	0
iTaukei	65-69	0
iTaukei	65-69	0
other	65-69	0
iTaukei	65-69	0
iTaukei	65-69	0
iTaukei	65-69	0
iTaukei	65-69	0
iTaukei	65-69	0
iTaukei	65-69	0
iTaukei	65-69	0
iTaukei	65-69	0
iTaukei	65-69	0
iTaukei	65-69	0
iTaukei	65-69	0
other	65-69	0
other	65-69	0
iTaukei	65-69	0
iTaukei	65-69	0
iTaukei	65-69	0
other	65-69	0
iTaukei	65-69	0
iTaukei	65-69	0
iTaukei	65-69	0
other	65-69	0
other	65-69	0
other	65-69	0
other	65-69	0
other	65-69	0
iTaukei	65-69	0
iTaukei	70+	0
iTaukei	70+	0
iTaukei	70+	0
iTaukei	70+	0
iTaukei	70+	0
iTaukei	70+	0
iTaukei	70+	0
iTaukei	70+	0
iTaukei	70+	0
iTaukei	70+	0
iTaukei	70+	0
iTaukei	70+	0
other	70+	0
iTaukei	70+	0
iTaukei	70+	0
iTaukei	70+	0
iTaukei	70+	0
iTaukei	70+	0
iTaukei	70+	0
iTaukei	70+	0
iTaukei	70+	0
iTaukei	70+	0
iTaukei	70+	0
iTaukei	70+	0
iTaukei	70+	0
iTaukei	70+	0
iTaukei	70+	0
other	70+	0
other	70+	0
other	70+	0
iTaukei	70+	0
iTaukei	70+	0
other	70+	0
iTaukei	70+	0
other	70+	0
other	70+	0
iTaukei	70+	0
iTaukei	70+	0
iTaukei	70+	0
iTaukei	01-04	1
iTaukei	01-04	1
iTaukei	01-04	1
iTaukei	01-04	1
iTaukei	01-04	1
iTaukei	01-04	1
iTaukei	01-04	1
iTaukei	01-04	1
iTaukei	01-04	1
iTaukei	01-04	1
iTaukei	01-04	1
iTaukei	01-04	1
iTaukei	01-04	1
iTaukei	01-04	1
iTaukei	01-04	1
iTaukei	01-04	1
other	01-04	1
iTaukei	01-04	1
iTaukei	01-04	1
iTaukei	01-04	1
iTaukei	01-04	1
iTaukei	01-04	1
iTaukei	01-04	1
other	01-04	1
iTaukei	01-04	1
other	01-04	1
iTaukei	01-04	1
iTaukei	01-04	1
iTaukei	01-04	1
iTaukei	01-04	1
iTaukei	01-04	1
iTaukei	01-04	1
iTaukei	01-04	1
iTaukei	05-09	1
iTaukei	05-09	1
iTaukei	05-09	1
iTaukei	05-09	1
iTaukei	05-09	1
iTaukei	05-09	1
iTaukei	05-09	1
iTaukei	05-09	1
iTaukei	05-09	1
iTaukei	05-09	1
iTaukei	05-09	1
iTaukei	05-09	1
iTaukei	05-09	1
iTaukei	05-09	1
iTaukei	05-09	1
iTaukei	05-09	1
iTaukei	05-09	1
iTaukei	05-09	1
iTaukei	05-09	1
iTaukei	05-09	1
iTaukei	05-09	1
iTaukei	05-09	1
iTaukei	05-09	1
iTaukei	05-09	1
iTaukei	05-09	1
iTaukei	05-09	1
iTaukei	05-09	1
iTaukei	05-09	1
iTaukei	05-09	1
iTaukei	05-09	1
iTaukei	05-09	1
iTaukei	05-09	1
iTaukei	05-09	1
other	05-09	1
iTaukei	05-09	1
other	05-09	1
other	05-09	1
iTaukei	05-09	1
other	05-09	1
iTaukei	05-09	1
iTaukei	05-09	1
iTaukei	05-09	1
iTaukei	05-09	1
iTaukei	05-09	1
other	05-09	1
iTaukei	05-09	1
iTaukei	05-09	1
iTaukei	05-09	1
iTaukei	05-09	1
iTaukei	05-09	1
iTaukei	05-09	1
iTaukei	05-09	1
iTaukei	05-09	1
other	05-09	1
iTaukei	05-09	1
other	05-09	1
iTaukei	05-09	1
iTaukei	05-09	1
other	05-09	1
other	05-09	1
other	05-09	1
iTaukei	05-09	1
iTaukei	05-09	1
iTaukei	05-09	1
iTaukei	05-09	1
iTaukei	05-09	1
iTaukei	05-09	1
iTaukei	05-09	1
iTaukei	05-09	1
iTaukei	05-09	1
iTaukei	10-14	1
iTaukei	10-14	1
iTaukei	10-14	1
other	10-14	1
iTaukei	10-14	1
iTaukei	10-14	1
other	10-14	1
iTaukei	10-14	1
iTaukei	10-14	1
iTaukei	10-14	1
other	10-14	1
iTaukei	10-14	1
iTaukei	10-14	1
iTaukei	10-14	1
iTaukei	10-14	1
other	10-14	1
iTaukei	10-14	1
iTaukei	10-14	1
iTaukei	10-14	1
iTaukei	10-14	1
iTaukei	10-14	1
iTaukei	10-14	1
iTaukei	10-14	1
iTaukei	10-14	1
iTaukei	10-14	1
iTaukei	10-14	1
iTaukei	10-14	1
iTaukei	10-14	1
iTaukei	10-14	1
iTaukei	10-14	1
iTaukei	10-14	1
iTaukei	10-14	1
iTaukei	10-14	1
iTaukei	10-14	1
other	10-14	1
other	10-14	1
iTaukei	10-14	1
iTaukei	10-14	1
iTaukei	10-14	1
iTaukei	10-14	1
iTaukei	10-14	1
other	10-14	1
other	10-14	1
iTaukei	10-14	1
iTaukei	10-14	1
iTaukei	10-14	1
other	10-14	1
iTaukei	10-14	1
iTaukei	10-14	1
iTaukei	10-14	1
iTaukei	10-14	1
iTaukei	10-14	1
iTaukei	10-14	1
iTaukei	10-14	1
iTaukei	10-14	1
iTaukei	10-14	1
iTaukei	10-14	1
iTaukei	10-14	1
iTaukei	10-14	1
iTaukei	10-14	1
iTaukei	10-14	1
iTaukei	10-14	1
iTaukei	10-14	1
iTaukei	10-14	1
other	10-14	1
other	10-14	1
other	10-14	1
iTaukei	10-14	1
iTaukei	10-14	1
other	10-14	1
other	10-14	1
other	10-14	1
other	10-14	1
other	10-14	1
other	10-14	1
iTaukei	10-14	1
iTaukei	10-14	1
iTaukei	10-14	1
other	10-14	1
iTaukei	10-14	1
iTaukei	10-14	1
other	10-14	1
iTaukei	10-14	1
iTaukei	10-14	1
iTaukei	10-14	1
iTaukei	10-14	1
iTaukei	10-14	1
iTaukei	10-14	1
iTaukei	10-14	1
iTaukei	10-14	1
iTaukei	10-14	1
iTaukei	10-14	1
iTaukei	10-14	1
iTaukei	15-19	1
iTaukei	15-19	1
iTaukei	15-19	1
iTaukei	15-19	1
iTaukei	15-19	1
iTaukei	15-19	1
iTaukei	15-19	1
iTaukei	15-19	1
other	15-19	1
iTaukei	15-19	1
other	15-19	1
other	15-19	1
iTaukei	15-19	1
iTaukei	15-19	1
iTaukei	15-19	1
iTaukei	15-19	1
iTaukei	15-19	1
iTaukei	15-19	1
iTaukei	15-19	1
iTaukei	15-19	1
iTaukei	15-19	1
iTaukei	15-19	1
iTaukei	15-19	1
iTaukei	15-19	1
iTaukei	15-19	1
iTaukei	15-19	1
iTaukei	15-19	1
iTaukei	15-19	1
iTaukei	15-19	1
iTaukei	15-19	1
iTaukei	15-19	1
iTaukei	15-19	1
iTaukei	15-19	1
iTaukei	15-19	1
iTaukei	15-19	1
other	15-19	1
other	15-19	1
iTaukei	15-19	1
iTaukei	15-19	1
iTaukei	15-19	1
other	15-19	1
iTaukei	15-19	1
iTaukei	15-19	1
iTaukei	15-19	1
iTaukei	15-19	1
iTaukei	15-19	1
iTaukei	15-19	1
iTaukei	15-19	1
iTaukei	15-19	1
iTaukei	15-19	1
iTaukei	15-19	1
other	15-19	1
iTaukei	15-19	1
iTaukei	15-19	1
iTaukei	15-19	1
iTaukei	15-19	1
iTaukei	15-19	1
iTaukei	15-19	1
iTaukei	15-19	1
iTaukei	15-19	1
iTaukei	15-19	1
iTaukei	15-19	1
iTaukei	15-19	1
other	15-19	1
iTaukei	15-19	1
iTaukei	15-19	1
iTaukei	15-19	1
iTaukei	15-19	1
iTaukei	15-19	1
iTaukei	15-19	1
iTaukei	15-19	1
other	15-19	1
other	15-19	1
iTaukei	15-19	1
other	15-19	1
other	15-19	1
other	15-19	1
other	15-19	1
other	15-19	1
iTaukei	15-19	1
iTaukei	15-19	1
iTaukei	15-19	1
iTaukei	15-19	1
iTaukei	15-19	1
iTaukei	15-19	1
iTaukei	15-19	1
iTaukei	15-19	1
iTaukei	15-19	1
iTaukei	15-19	1
iTaukei	15-19	1
iTaukei	15-19	1
iTaukei	15-19	1
iTaukei	20-24	1
iTaukei	20-24	1
iTaukei	20-24	1
other	20-24	1
other	20-24	1
iTaukei	20-24	1
iTaukei	20-24	1
iTaukei	20-24	1
iTaukei	20-24	1
iTaukei	20-24	1
iTaukei	20-24	1
iTaukei	20-24	1
iTaukei	20-24	1
iTaukei	20-24	1
iTaukei	20-24	1
iTaukei	20-24	1
iTaukei	20-24	1
iTaukei	20-24	1
iTaukei	20-24	1
iTaukei	20-24	1
iTaukei	20-24	1
iTaukei	20-24	1
iTaukei	20-24	1
iTaukei	20-24	1
iTaukei	20-24	1
iTaukei	20-24	1
other	20-24	1
iTaukei	20-24	1
iTaukei	20-24	1
iTaukei	20-24	1
iTaukei	20-24	1
iTaukei	20-24	1
iTaukei	20-24	1
iTaukei	20-24	1
iTaukei	20-24	1
iTaukei	20-24	1
iTaukei	20-24	1
other	20-24	1
iTaukei	20-24	1
iTaukei	20-24	1
iTaukei	20-24	1
iTaukei	20-24	1
iTaukei	20-24	1
iTaukei	20-24	1
iTaukei	20-24	1
iTaukei	20-24	1
iTaukei	20-24	1
iTaukei	20-24	1
iTaukei	20-24	1
iTaukei	20-24	1
iTaukei	20-24	1
other	20-24	1
iTaukei	20-24	1
iTaukei	20-24	1
iTaukei	20-24	1
other	20-24	1
iTaukei	20-24	1
other	20-24	1
other	20-24	1
other	20-24	1
iTaukei	20-24	1
iTaukei	20-24	1
iTaukei	20-24	1
iTaukei	20-24	1
iTaukei	20-24	1
iTaukei	20-24	1
iTaukei	20-24	1
other	20-24	1
iTaukei	20-24	1
other	20-24	1
iTaukei	20-24	1
other	20-24	1
other	20-24	1
other	20-24	1
other	20-24	1
other	20-24	1
iTaukei	20-24	1
iTaukei	20-24	1
other	20-24	1
iTaukei	20-24	1
iTaukei	20-24	1
iTaukei	20-24	1
iTaukei	20-24	1
iTaukei	20-24	1
iTaukei	20-24	1
iTaukei	20-24	1
iTaukei	20-24	1
iTaukei	20-24	1
iTaukei	20-24	1
iTaukei	20-24	1
iTaukei	20-24	1
iTaukei	20-24	1
iTaukei	20-24	1
iTaukei	25-29	1
iTaukei	25-29	1
iTaukei	25-29	1
iTaukei	25-29	1
iTaukei	25-29	1
iTaukei	25-29	1
iTaukei	25-29	1
iTaukei	25-29	1
iTaukei	25-29	1
other	25-29	1
iTaukei	25-29	1
other	25-29	1
iTaukei	25-29	1
iTaukei	25-29	1
iTaukei	25-29	1
iTaukei	25-29	1
iTaukei	25-29	1
iTaukei	25-29	1
iTaukei	25-29	1
iTaukei	25-29	1
iTaukei	25-29	1
iTaukei	25-29	1
iTaukei	25-29	1
other	25-29	1
iTaukei	25-29	1
other	25-29	1
iTaukei	25-29	1
iTaukei	25-29	1
iTaukei	25-29	1
other	25-29	1
iTaukei	25-29	1
iTaukei	25-29	1
iTaukei	25-29	1
iTaukei	25-29	1
iTaukei	25-29	1
iTaukei	25-29	1
other	25-29	1
iTaukei	25-29	1
iTaukei	25-29	1
iTaukei	25-29	1
iTaukei	25-29	1
iTaukei	25-29	1
iTaukei	25-29	1
iTaukei	25-29	1
iTaukei	25-29	1
other	25-29	1
iTaukei	25-29	1
iTaukei	25-29	1
iTaukei	25-29	1
other	25-29	1
iTaukei	25-29	1
other	25-29	1
other	25-29	1
iTaukei	25-29	1
iTaukei	25-29	1
iTaukei	25-29	1
iTaukei	25-29	1
iTaukei	25-29	1
iTaukei	25-29	1
iTaukei	25-29	1
other	25-29	1
other	25-29	1
other	25-29	1
other	25-29	1
other	25-29	1
other	25-29	1
iTaukei	25-29	1
iTaukei	25-29	1
iTaukei	25-29	1
iTaukei	25-29	1
other	25-29	1
iTaukei	25-29	1
iTaukei	25-29	1
iTaukei	25-29	1
iTaukei	25-29	1
iTaukei	25-29	1
iTaukei	25-29	1
iTaukei	25-29	1
iTaukei	30-34	1
other	30-34	1
iTaukei	30-34	1
iTaukei	30-34	1
iTaukei	30-34	1
iTaukei	30-34	1
iTaukei	30-34	1
iTaukei	30-34	1
iTaukei	30-34	1
iTaukei	30-34	1
iTaukei	30-34	1
iTaukei	30-34	1
iTaukei	30-34	1
iTaukei	30-34	1
other	30-34	1
iTaukei	30-34	1
other	30-34	1
iTaukei	30-34	1
iTaukei	30-34	1
iTaukei	30-34	1
iTaukei	30-34	1
iTaukei	30-34	1
iTaukei	30-34	1
iTaukei	30-34	1
iTaukei	30-34	1
other	30-34	1
other	30-34	1
iTaukei	30-34	1
other	30-34	1
iTaukei	30-34	1
iTaukei	30-34	1
iTaukei	30-34	1
iTaukei	30-34	1
iTaukei	30-34	1
other	30-34	1
iTaukei	30-34	1
other	30-34	1
iTaukei	30-34	1
iTaukei	30-34	1
iTaukei	30-34	1
other	30-34	1
iTaukei	30-34	1
iTaukei	30-34	1
iTaukei	30-34	1
iTaukei	30-34	1
iTaukei	30-34	1
iTaukei	30-34	1
iTaukei	30-34	1
iTaukei	30-34	1
other	30-34	1
iTaukei	30-34	1
other	30-34	1
iTaukei	30-34	1
iTaukei	30-34	1
iTaukei	30-34	1
other	30-34	1
other	30-34	1
iTaukei	30-34	1
other	30-34	1
other	30-34	1
iTaukei	30-34	1
other	30-34	1
other	30-34	1
other	30-34	1
iTaukei	30-34	1
iTaukei	30-34	1
other	30-34	1
other	30-34	1
other	30-34	1
iTaukei	30-34	1
iTaukei	30-34	1
iTaukei	30-34	1
iTaukei	30-34	1
iTaukei	30-34	1
other	30-34	1
iTaukei	30-34	1
other	30-34	1
iTaukei	30-34	1
iTaukei	30-34	1
iTaukei	30-34	1
iTaukei	30-34	1
iTaukei	30-34	1
iTaukei	30-34	1
iTaukei	30-34	1
iTaukei	30-34	1
iTaukei	30-34	1
iTaukei	30-34	1
iTaukei	35-39	1
iTaukei	35-39	1
iTaukei	35-39	1
other	35-39	1
other	35-39	1
iTaukei	35-39	1
iTaukei	35-39	1
iTaukei	35-39	1
iTaukei	35-39	1
iTaukei	35-39	1
iTaukei	35-39	1
iTaukei	35-39	1
iTaukei	35-39	1
iTaukei	35-39	1
other	35-39	1
iTaukei	35-39	1
other	35-39	1
iTaukei	35-39	1
other	35-39	1
iTaukei	35-39	1
iTaukei	35-39	1
iTaukei	35-39	1
iTaukei	35-39	1
iTaukei	35-39	1
other	35-39	1
iTaukei	35-39	1
iTaukei	35-39	1
iTaukei	35-39	1
other	35-39	1
other	35-39	1
other	35-39	1
iTaukei	35-39	1
other	35-39	1
iTaukei	35-39	1
iTaukei	35-39	1
other	35-39	1
other	35-39	1
other	35-39	1
iTaukei	35-39	1
iTaukei	35-39	1
iTaukei	35-39	1
iTaukei	35-39	1
iTaukei	35-39	1
other	35-39	1
iTaukei	35-39	1
iTaukei	35-39	1
iTaukei	35-39	1
iTaukei	35-39	1
iTaukei	35-39	1
iTaukei	35-39	1
other	35-39	1
other	35-39	1
iTaukei	35-39	1
other	35-39	1
iTaukei	35-39	1
other	35-39	1
iTaukei	35-39	1
iTaukei	35-39	1
iTaukei	35-39	1
iTaukei	35-39	1
iTaukei	35-39	1
other	35-39	1
iTaukei	35-39	1
other	35-39	1
other	35-39	1
other	35-39	1
other	35-39	1
other	35-39	1
iTaukei	35-39	1
iTaukei	35-39	1
iTaukei	35-39	1
iTaukei	35-39	1
iTaukei	35-39	1
iTaukei	35-39	1
other	35-39	1
iTaukei	35-39	1
iTaukei	35-39	1
iTaukei	40-44	1
iTaukei	40-44	1
other	40-44	1
other	40-44	1
iTaukei	40-44	1
iTaukei	40-44	1
iTaukei	40-44	1
iTaukei	40-44	1
iTaukei	40-44	1
iTaukei	40-44	1
iTaukei	40-44	1
iTaukei	40-44	1
iTaukei	40-44	1
iTaukei	40-44	1
iTaukei	40-44	1
iTaukei	40-44	1
iTaukei	40-44	1
iTaukei	40-44	1
other	40-44	1
iTaukei	40-44	1
other	40-44	1
iTaukei	40-44	1
iTaukei	40-44	1
iTaukei	40-44	1
other	40-44	1
other	40-44	1
iTaukei	40-44	1
iTaukei	40-44	1
other	40-44	1
iTaukei	40-44	1
iTaukei	40-44	1
iTaukei	40-44	1
iTaukei	40-44	1
iTaukei	40-44	1
other	40-44	1
iTaukei	40-44	1
iTaukei	40-44	1
iTaukei	40-44	1
iTaukei	40-44	1
iTaukei	40-44	1
iTaukei	40-44	1
iTaukei	40-44	1
iTaukei	40-44	1
iTaukei	40-44	1
other	40-44	1
other	40-44	1
other	40-44	1
other	40-44	1
iTaukei	40-44	1
other	40-44	1
iTaukei	40-44	1
iTaukei	40-44	1
iTaukei	40-44	1
iTaukei	40-44	1
iTaukei	40-44	1
iTaukei	40-44	1
iTaukei	40-44	1
iTaukei	45-49	1
other	45-49	1
iTaukei	45-49	1
iTaukei	45-49	1
iTaukei	45-49	1
iTaukei	45-49	1
iTaukei	45-49	1
iTaukei	45-49	1
iTaukei	45-49	1
iTaukei	45-49	1
other	45-49	1
other	45-49	1
iTaukei	45-49	1
iTaukei	45-49	1
iTaukei	45-49	1
iTaukei	45-49	1
iTaukei	45-49	1
other	45-49	1
other	45-49	1
other	45-49	1
iTaukei	45-49	1
other	45-49	1
iTaukei	45-49	1
iTaukei	45-49	1
iTaukei	45-49	1
iTaukei	45-49	1
iTaukei	45-49	1
iTaukei	45-49	1
other	45-49	1
other	45-49	1
other	45-49	1
other	45-49	1
other	45-49	1
other	45-49	1
iTaukei	45-49	1
iTaukei	45-49	1
other	45-49	1
iTaukei	45-49	1
iTaukei	45-49	1
iTaukei	45-49	1
iTaukei	45-49	1
iTaukei	45-49	1
iTaukei	45-49	1
iTaukei	45-49	1
iTaukei	45-49	1
iTaukei	45-49	1
other	45-49	1
iTaukei	45-49	1
iTaukei	45-49	1
iTaukei	45-49	1
iTaukei	45-49	1
other	45-49	1
iTaukei	45-49	1
other	45-49	1
iTaukei	45-49	1
iTaukei	45-49	1
iTaukei	45-49	1
iTaukei	45-49	1
other	45-49	1
other	45-49	1
other	45-49	1
iTaukei	45-49	1
other	45-49	1
other	45-49	1
other	45-49	1
iTaukei	45-49	1
iTaukei	45-49	1
iTaukei	45-49	1
iTaukei	45-49	1
iTaukei	45-49	1
iTaukei	45-49	1
iTaukei	45-49	1
iTaukei	45-49	1
iTaukei	45-49	1
iTaukei	50-54	1
iTaukei	50-54	1
iTaukei	50-54	1
iTaukei	50-54	1
iTaukei	50-54	1
iTaukei	50-54	1
iTaukei	50-54	1
iTaukei	50-54	1
iTaukei	50-54	1
other	50-54	1
iTaukei	50-54	1
iTaukei	50-54	1
iTaukei	50-54	1
other	50-54	1
iTaukei	50-54	1
iTaukei	50-54	1
iTaukei	50-54	1
iTaukei	50-54	1
other	50-54	1
other	50-54	1
iTaukei	50-54	1
iTaukei	50-54	1
iTaukei	50-54	1
iTaukei	50-54	1
iTaukei	50-54	1
iTaukei	50-54	1
iTaukei	50-54	1
other	50-54	1
iTaukei	50-54	1
other	50-54	1
other	50-54	1
other	50-54	1
other	50-54	1
iTaukei	50-54	1
iTaukei	50-54	1
iTaukei	50-54	1
iTaukei	50-54	1
iTaukei	50-54	1
iTaukei	50-54	1
iTaukei	50-54	1
iTaukei	50-54	1
iTaukei	50-54	1
iTaukei	50-54	1
iTaukei	50-54	1
iTaukei	50-54	1
iTaukei	50-54	1
iTaukei	50-54	1
other	50-54	1
other	50-54	1
iTaukei	50-54	1
iTaukei	50-54	1
iTaukei	50-54	1
iTaukei	50-54	1
iTaukei	50-54	1
iTaukei	50-54	1
other	50-54	1
other	50-54	1
other	50-54	1
other	50-54	1
iTaukei	50-54	1
other	50-54	1
iTaukei	50-54	1
other	50-54	1
iTaukei	50-54	1
iTaukei	50-54	1
iTaukei	50-54	1
iTaukei	50-54	1
iTaukei	50-54	1
iTaukei	50-54	1
iTaukei	50-54	1
iTaukei	55-59	1
iTaukei	55-59	1
other	55-59	1
iTaukei	55-59	1
iTaukei	55-59	1
other	55-59	1
iTaukei	55-59	1
iTaukei	55-59	1
iTaukei	55-59	1
iTaukei	55-59	1
iTaukei	55-59	1
other	55-59	1
other	55-59	1
iTaukei	55-59	1
iTaukei	55-59	1
iTaukei	55-59	1
iTaukei	55-59	1
other	55-59	1
other	55-59	1
iTaukei	55-59	1
iTaukei	55-59	1
other	55-59	1
iTaukei	55-59	1
iTaukei	55-59	1
iTaukei	55-59	1
iTaukei	55-59	1
iTaukei	55-59	1
iTaukei	55-59	1
iTaukei	55-59	1
iTaukei	55-59	1
other	55-59	1
iTaukei	55-59	1
iTaukei	55-59	1
other	55-59	1
other	55-59	1
iTaukei	55-59	1
iTaukei	55-59	1
iTaukei	55-59	1
iTaukei	55-59	1
iTaukei	55-59	1
iTaukei	55-59	1
iTaukei	55-59	1
other	55-59	1
other	55-59	1
other	55-59	1
other	55-59	1
iTaukei	55-59	1
iTaukei	55-59	1
iTaukei	55-59	1
iTaukei	55-59	1
iTaukei	55-59	1
other	60-64	1
iTaukei	60-64	1
iTaukei	60-64	1
iTaukei	60-64	1
iTaukei	60-64	1
iTaukei	60-64	1
iTaukei	60-64	1
iTaukei	60-64	1
other	60-64	1
iTaukei	60-64	1
iTaukei	60-64	1
iTaukei	60-64	1
other	60-64	1
other	60-64	1
other	60-64	1
iTaukei	60-64	1
iTaukei	60-64	1
iTaukei	60-64	1
iTaukei	60-64	1
iTaukei	60-64	1
iTaukei	60-64	1
other	60-64	1
iTaukei	60-64	1
iTaukei	60-64	1
iTaukei	60-64	1
iTaukei	60-64	1
iTaukei	60-64	1
iTaukei	60-64	1
iTaukei	60-64	1
other	60-64	1
iTaukei	60-64	1
iTaukei	60-64	1
iTaukei	60-64	1
iTaukei	60-64	1
other	65-69	1
other	65-69	1
iTaukei	65-69	1
iTaukei	65-69	1
iTaukei	65-69	1
iTaukei	65-69	1
iTaukei	65-69	1
iTaukei	65-69	1
iTaukei	65-69	1
other	65-69	1
iTaukei	65-69	1
iTaukei	65-69	1
iTaukei	65-69	1
iTaukei	65-69	1
other	65-69	1
other	65-69	1
iTaukei	65-69	1
iTaukei	65-69	1
iTaukei	65-69	1
other	65-69	1
iTaukei	65-69	1
iTaukei	65-69	1
iTaukei	65-69	1
other	65-69	1
iTaukei	65-69	1
other	65-69	1
other	65-69	1
other	65-69	1
iTaukei	65-69	1
other	65-69	1
iTaukei	65-69	1
iTaukei	65-69	1
iTaukei	65-69	1
iTaukei	65-69	1
other	70+	1
iTaukei	70+	1
other	70+	1
iTaukei	70+	1
iTaukei	70+	1
iTaukei	70+	1
iTaukei	70+	1
iTaukei	70+	1
iTaukei	70+	1
iTaukei	70+	1
other	70+	1
iTaukei	70+	1
iTaukei	70+	1
iTaukei	70+	1
iTaukei	70+	1
iTaukei	70+	1
other	70+	1
other	70+	1
iTaukei	70+	1
iTaukei	70+	1
iTaukei	70+	1
iTaukei	70+	1
iTaukei	70+	1
iTaukei	70+	1
iTaukei	70+	1
iTaukei	70+	1
iTaukei	70+	1
iTaukei	70+	1
iTaukei	70+	1
iTaukei	70+	1
iTaukei	70+	1

## Sheet: movedhome
eth	age	ever_moved	moved_last5y
iTaukei	01-04	FALSE	FALSE
iTaukei	05-09	FALSE	FALSE
iTaukei	05-09	FALSE	FALSE
iTaukei	05-09	FALSE	FALSE
iTaukei	10-14	FALSE	FALSE
iTaukei	10-14	FALSE	FALSE
iTaukei	15-19	FALSE	FALSE
other	30-34	FALSE	FALSE
iTaukei	35-39	FALSE	FALSE
iTaukei	35-39	FALSE	FALSE
iTaukei	45-49	FALSE	FALSE
iTaukei	01-04	FALSE	FALSE
iTaukei	05-09	FALSE	FALSE
iTaukei	05-09	FALSE	FALSE
iTaukei	10-14	FALSE	FALSE
iTaukei	10-14	FALSE	FALSE
iTaukei	15-19	FALSE	FALSE
iTaukei	20-24	FALSE	FALSE
iTaukei	20-24	FALSE	FALSE
other	25-29	FALSE	FALSE
iTaukei	25-29	FALSE	FALSE
iTaukei	30-34	FALSE	FALSE
other	45-49	FALSE	FALSE
other	55-59	FALSE	FALSE
iTaukei	05-09	FALSE	FALSE
iTaukei	05-09	FALSE	FALSE
other	05-09	FALSE	FALSE
iTaukei	05-09	FALSE	FALSE
iTaukei	15-19	FALSE	FALSE
iTaukei	15-19	FALSE	FALSE
iTaukei	20-24	FALSE	FALSE
other	20-24	FALSE	FALSE
other	30-34	FALSE	FALSE
other	30-34	FALSE	FALSE
other	35-39	FALSE	FALSE
iTaukei	35-39	FALSE	FALSE
iTaukei	45-49	FALSE	FALSE
other	60-64	FALSE	FALSE
other	60-64	FALSE	FALSE
iTaukei	70+	FALSE	FALSE
iTaukei	05-09	FALSE	FALSE
iTaukei	01-04	FALSE	FALSE
iTaukei	05-09	FALSE	FALSE
other	10-14	FALSE	FALSE
iTaukei	10-14	FALSE	FALSE
other	15-19	FALSE	FALSE
other	20-24	FALSE	FALSE
iTaukei	25-29	FALSE	FALSE
iTaukei	30-34	FALSE	FALSE
other	70+	FALSE	FALSE
iTaukei	05-09	FALSE	FALSE
other	05-09	FALSE	FALSE
iTaukei	05-09	FALSE	FALSE
iTaukei	05-09	FALSE	FALSE
iTaukei	05-09	FALSE	FALSE
iTaukei	10-14	FALSE	FALSE
iTaukei	10-14	FALSE	FALSE
other	10-14	FALSE	FALSE
other	15-19	FALSE	FALSE
other	15-19	FALSE	FALSE
other	15-19	FALSE	FALSE
other	20-24	FALSE	FALSE
iTaukei	20-24	FALSE	FALSE
iTaukei	30-34	FALSE	FALSE
iTaukei	30-34	FALSE	FALSE
iTaukei	30-34	FALSE	FALSE
iTaukei	35-39	FALSE	FALSE
iTaukei	45-49	FALSE	FALSE
other	55-59	FALSE	FALSE
other	55-59	FALSE	FALSE
other	65-69	FALSE	FALSE
iTaukei	01-04	FALSE	FALSE
iTaukei	01-04	FALSE	FALSE
iTaukei	05-09	FALSE	FALSE
iTaukei	10-14	FALSE	FALSE
iTaukei	15-19	FALSE	FALSE
iTaukei	20-24	FALSE	FALSE
iTaukei	20-24	FALSE	FALSE
iTaukei	20-24	FALSE	FALSE
iTaukei	25-29	FALSE	FALSE
iTaukei	25-29	FALSE	FALSE
iTaukei	25-29	FALSE	FALSE
iTaukei	65-69	FALSE	FALSE
iTaukei	01-04	FALSE	FALSE
iTaukei	05-09	FALSE	FALSE
iTaukei	01-04	FALSE	FALSE
iTaukei	05-09	FALSE	FALSE
iTaukei	05-09	FALSE	FALSE
iTaukei	10-14	FALSE	FALSE
iTaukei	15-19	FALSE	FALSE
iTaukei	15-19	FALSE	FALSE
iTaukei	15-19	FALSE	FALSE
iTaukei	20-24	FALSE	FALSE
iTaukei	20-24	FALSE	FALSE
iTaukei	25-29	FALSE	FALSE
iTaukei	30-34	FALSE	FALSE
iTaukei	30-34	FALSE	FALSE
other	01-04	FALSE	FALSE
iTaukei	01-04	FALSE	FALSE
other	01-04	FALSE	FALSE
iTaukei	01-04	FALSE	FALSE
iTaukei	05-09	FALSE	FALSE
iTaukei	10-14	FALSE	FALSE
iTaukei	10-14	FALSE	FALSE
iTaukei	15-19	FALSE	FALSE
iTaukei	15-19	FALSE	FALSE
iTaukei	15-19	FALSE	FALSE
iTaukei	20-24	FALSE	FALSE
iTaukei	20-24	FALSE	FALSE
iTaukei	20-24	FALSE	FALSE
iTaukei	20-24	FALSE	FALSE
other	25-29	FALSE	FALSE
other	30-34	FALSE	FALSE
iTaukei	40-44	FALSE	FALSE
iTaukei	70+	FALSE	FALSE
iTaukei	70+	FALSE	FALSE
iTaukei	05-09	FALSE	FALSE
iTaukei	01-04	FALSE	FALSE
iTaukei	01-04	FALSE	FALSE
iTaukei	01-04	FALSE	FALSE
iTaukei	01-04	FALSE	FALSE
iTaukei	05-09	FALSE	FALSE
iTaukei	05-09	FALSE	FALSE
iTaukei	15-19	FALSE	FALSE
iTaukei	15-19	FALSE	FALSE
iTaukei	20-24	FALSE	FALSE
iTaukei	25-29	FALSE	FALSE
iTaukei	30-34	FALSE	FALSE
iTaukei	40-44	FALSE	FALSE
iTaukei	40-44	FALSE	FALSE
iTaukei	45-49	FALSE	FALSE
iTaukei	05-09	FALSE	FALSE
other	05-09	FALSE	FALSE
other	10-14	FALSE	FALSE
iTaukei	10-14	FALSE	FALSE
iTaukei	10-14	FALSE	FALSE
iTaukei	10-14	FALSE	FALSE
iTaukei	15-19	FALSE	FALSE
iTaukei	15-19	FALSE	FALSE
iTaukei	15-19	FALSE	FALSE
iTaukei	20-24	FALSE	FALSE
iTaukei	20-24	FALSE	FALSE
iTaukei	20-24	FALSE	FALSE
iTaukei	20-24	FALSE	FALSE
iTaukei	10-14	FALSE	FALSE
other	01-04	FALSE	FALSE
other	01-04	FALSE	FALSE
iTaukei	05-09	FALSE	FALSE
iTaukei	10-14	FALSE	FALSE
iTaukei	10-14	FALSE	FALSE
iTaukei	15-19	FALSE	FALSE
iTaukei	15-19	FALSE	FALSE
iTaukei	15-19	FALSE	FALSE
iTaukei	15-19	FALSE	FALSE
iTaukei	15-19	FALSE	FALSE
iTaukei	25-29	FALSE	FALSE
other	25-29	FALSE	FALSE
iTaukei	40-44	FALSE	FALSE
other	55-59	FALSE	FALSE
iTaukei	60-64	FALSE	FALSE
iTaukei	15-19	FALSE	FALSE
iTaukei	05-09	FALSE	FALSE
iTaukei	05-09	FALSE	FALSE
iTaukei	15-19	FALSE	FALSE
iTaukei	20-24	FALSE	FALSE
iTaukei	20-24	FALSE	FALSE
iTaukei	20-24	FALSE	FALSE
iTaukei	20-24	FALSE	FALSE
iTaukei	25-29	FALSE	FALSE
iTaukei	25-29	FALSE	FALSE
iTaukei	25-29	FALSE	FALSE
iTaukei	25-29	FALSE	FALSE
iTaukei	45-49	FALSE	FALSE
iTaukei	50-54	FALSE	FALSE
iTaukei	55-59	FALSE	FALSE
iTaukei	70+	FALSE	FALSE
iTaukei	01-04	FALSE	FALSE
iTaukei	05-09	FALSE	FALSE
iTaukei	05-09	FALSE	FALSE
iTaukei	05-09	FALSE	FALSE
iTaukei	10-14	FALSE	FALSE
iTaukei	10-14	FALSE	FALSE
iTaukei	10-14	FALSE	FALSE
iTaukei	10-14	FALSE	FALSE
iTaukei	10-14	FALSE	FALSE
iTaukei	15-19	FALSE	FALSE
iTaukei	20-24	FALSE	FALSE
iTaukei	60-64	FALSE	FALSE
iTaukei	70+	FALSE	FALSE
iTaukei	01-04	FALSE	FALSE
iTaukei	01-04	FALSE	FALSE
iTaukei	01-04	FALSE	FALSE
iTaukei	05-09	FALSE	FALSE
iTaukei	10-14	FALSE	FALSE
iTaukei	10-14	FALSE	FALSE
iTaukei	10-14	FALSE	FALSE
iTaukei	15-19	FALSE	FALSE
iTaukei	15-19	FALSE	FALSE
iTaukei	25-29	FALSE	FALSE
iTaukei	30-34	FALSE	FALSE
iTaukei	35-39	FALSE	FALSE
iTaukei	35-39	FALSE	FALSE
iTaukei	50-54	FALSE	FALSE
iTaukei	55-59	FALSE	FALSE
iTaukei	60-64	FALSE	FALSE
iTaukei	70+	FALSE	FALSE
iTaukei	05-09	FALSE	FALSE
iTaukei	01-04	FALSE	FALSE
iTaukei	01-04	FALSE	FALSE
iTaukei	05-09	FALSE	FALSE
iTaukei	05-09	FALSE	FALSE
iTaukei	10-14	FALSE	FALSE
iTaukei	10-14	FALSE	FALSE
iTaukei	15-19	FALSE	FALSE
iTaukei	15-19	FALSE	FALSE
iTaukei	15-19	FALSE	FALSE
iTaukei	15-19	FALSE	FALSE
iTaukei	20-24	FALSE	FALSE
iTaukei	25-29	FALSE	FALSE
iTaukei	35-39	FALSE	FALSE
iTaukei	35-39	FALSE	FALSE
iTaukei	40-44	FALSE	FALSE
iTaukei	40-44	FALSE	FALSE
iTaukei	70+	FALSE	FALSE
iTaukei	70+	FALSE	FALSE
iTaukei	01-04	FALSE	FALSE
iTaukei	01-04	FALSE	FALSE
iTaukei	01-04	FALSE	FALSE
iTaukei	05-09	FALSE	FALSE
iTaukei	05-09	FALSE	FALSE
iTaukei	10-14	FALSE	FALSE
iTaukei	15-19	FALSE	FALSE
iTaukei	15-19	FALSE	FALSE
iTaukei	20-24	FALSE	FALSE
iTaukei	25-29	FALSE	FALSE
iTaukei	25-29	FALSE	FALSE
iTaukei	35-39	FALSE	FALSE
iTaukei	40-44	FALSE	FALSE
iTaukei	45-49	FALSE	FALSE
iTaukei	50-54	FALSE	FALSE
iTaukei	60-64	FALSE	FALSE
iTaukei	60-64	FALSE	FALSE
iTaukei	65-69	FALSE	FALSE
iTaukei	01-04	FALSE	FALSE
iTaukei	01-04	FALSE	FALSE
iTaukei	01-04	FALSE	FALSE
iTaukei	05-09	FALSE	FALSE
iTaukei	05-09	FALSE	FALSE
iTaukei	05-09	FALSE	FALSE
iTaukei	05-09	FALSE	FALSE
iTaukei	20-24	FALSE	FALSE
iTaukei	20-24	FALSE	FALSE
iTaukei	20-24	FALSE	FALSE
iTaukei	30-34	FALSE	FALSE
iTaukei	30-34	FALSE	FALSE
other	45-49	FALSE	FALSE
iTaukei	50-54	FALSE	FALSE
other	50-54	FALSE	FALSE
iTaukei	01-04	FALSE	FALSE
iTaukei	05-09	FALSE	FALSE
iTaukei	05-09	FALSE	FALSE
iTaukei	05-09	FALSE	FALSE
iTaukei	10-14	FALSE	FALSE
iTaukei	10-14	FALSE	FALSE
iTaukei	15-19	FALSE	FALSE
iTaukei	15-19	FALSE	FALSE
iTaukei	15-19	FALSE	FALSE
iTaukei	15-19	FALSE	FALSE
iTaukei	20-24	FALSE	FALSE
iTaukei	25-29	FALSE	FALSE
iTaukei	25-29	FALSE	FALSE
iTaukei	30-34	FALSE	FALSE
iTaukei	50-54	FALSE	FALSE
iTaukei	60-64	FALSE	FALSE
iTaukei	60-64	FALSE	FALSE
iTaukei	65-69	FALSE	FALSE
iTaukei	65-69	FALSE	FALSE
iTaukei	01-04	FALSE	FALSE
iTaukei	05-09	FALSE	FALSE
iTaukei	05-09	FALSE	FALSE
iTaukei	05-09	FALSE	FALSE
iTaukei	05-09	FALSE	FALSE
iTaukei	10-14	FALSE	FALSE
iTaukei	10-14	FALSE	FALSE
iTaukei	10-14	FALSE	FALSE
iTaukei	15-19	FALSE	FALSE
iTaukei	15-19	FALSE	FALSE
iTaukei	20-24	FALSE	FALSE
iTaukei	20-24	FALSE	FALSE
iTaukei	20-24	FALSE	FALSE
iTaukei	30-34	FALSE	FALSE
iTaukei	35-39	FALSE	FALSE
iTaukei	40-44	FALSE	FALSE
iTaukei	45-49	FALSE	FALSE
iTaukei	50-54	FALSE	FALSE
iTaukei	65-69	FALSE	FALSE
iTaukei	01-04	FALSE	FALSE
iTaukei	01-04	FALSE	FALSE
iTaukei	05-09	FALSE	FALSE
iTaukei	05-09	FALSE	FALSE
iTaukei	05-09	FALSE	FALSE
iTaukei	10-14	FALSE	FALSE
iTaukei	10-14	FALSE	FALSE
iTaukei	15-19	FALSE	FALSE
iTaukei	15-19	FALSE	FALSE
iTaukei	15-19	FALSE	FALSE
iTaukei	15-19	FALSE	FALSE
iTaukei	30-34	FALSE	FALSE
iTaukei	30-34	FALSE	FALSE
iTaukei	30-34	FALSE	FALSE
iTaukei	35-39	FALSE	FALSE
iTaukei	45-49	FALSE	FALSE
iTaukei	50-54	FALSE	FALSE
iTaukei	65-69	FALSE	FALSE
iTaukei	10-14	FALSE	FALSE
iTaukei	70+	FALSE	FALSE
iTaukei	70+	FALSE	FALSE
iTaukei	01-04	FALSE	FALSE
iTaukei	01-04	FALSE	FALSE
iTaukei	01-04	FALSE	FALSE
iTaukei	05-09	FALSE	FALSE
iTaukei	05-09	FALSE	FALSE
iTaukei	05-09	FALSE	FALSE
iTaukei	10-14	FALSE	FALSE
iTaukei	10-14	FALSE	FALSE
iTaukei	10-14	FALSE	FALSE
iTaukei	10-14	FALSE	FALSE
iTaukei	15-19	FALSE	FALSE
iTaukei	15-19	FALSE	FALSE
iTaukei	20-24	FALSE	FALSE
iTaukei	20-24	FALSE	FALSE
iTaukei	20-24	FALSE	FALSE
iTaukei	25-29	FALSE	FALSE
iTaukei	50-54	FALSE	FALSE
iTaukei	55-59	FALSE	FALSE
iTaukei	65-69	FALSE	FALSE
iTaukei	70+	FALSE	FALSE
iTaukei	01-04	FALSE	FALSE
other	01-04	FALSE	FALSE
iTaukei	05-09	FALSE	FALSE
iTaukei	05-09	FALSE	FALSE
iTaukei	10-14	FALSE	FALSE
iTaukei	15-19	FALSE	FALSE
other	20-24	FALSE	FALSE
iTaukei	45-49	FALSE	FALSE
other	05-09	FALSE	FALSE
other	05-09	FALSE	FALSE
iTaukei	15-19	FALSE	FALSE
iTaukei	25-29	FALSE	FALSE
other	25-29	FALSE	FALSE
other	35-39	FALSE	FALSE
iTaukei	45-49	FALSE	FALSE
iTaukei	50-54	FALSE	FALSE
other	70+	FALSE	FALSE
iTaukei	25-29	FALSE	FALSE
iTaukei	35-39	FALSE	FALSE
iTaukei	25-29	FALSE	FALSE
iTaukei	20-24	FALSE	FALSE
iTaukei	65-69	FALSE	FALSE
iTaukei	70+	FALSE	FALSE
iTaukei	50-54	FALSE	FALSE
iTaukei	10-14	FALSE	FALSE
iTaukei	70+	FALSE	FALSE
iTaukei	25-29	FALSE	FALSE
iTaukei	15-19	FALSE	FALSE
iTaukei	05-09	FALSE	FALSE
iTaukei	10-14	FALSE	FALSE
iTaukei	05-09	FALSE	FALSE
iTaukei	10-14	FALSE	FALSE
iTaukei	10-14	FALSE	FALSE
iTaukei	10-14	FALSE	FALSE
iTaukei	10-14	FALSE	FALSE
iTaukei	10-14	FALSE	FALSE
iTaukei	20-24	FALSE	FALSE
iTaukei	20-24	FALSE	FALSE
iTaukei	20-24	FALSE	FALSE
iTaukei	25-29	FALSE	FALSE
iTaukei	30-34	FALSE	FALSE
iTaukei	35-39	FALSE	FALSE
iTaukei	35-39	FALSE	FALSE
iTaukei	35-39	FALSE	FALSE
iTaukei	45-49	FALSE	FALSE
iTaukei	50-54	FALSE	FALSE
iTaukei	60-64	FALSE	FALSE
iTaukei	60-64	FALSE	FALSE
iTaukei	70+	FALSE	FALSE
iTaukei	05-09	FALSE	FALSE
iTaukei	35-39	FALSE	FALSE
iTaukei	05-09	FALSE	FALSE
other	01-04	FALSE	FALSE
other	05-09	FALSE	FALSE
iTaukei	05-09	FALSE	FALSE
other	05-09	FALSE	FALSE
other	05-09	FALSE	FALSE
other	10-14	FALSE	FALSE
other	10-14	FALSE	FALSE
other	10-14	FALSE	FALSE
other	15-19	FALSE	FALSE
iTaukei	15-19	FALSE	FALSE
iTaukei	20-24	FALSE	FALSE
iTaukei	20-24	FALSE	FALSE
iTaukei	25-29	FALSE	FALSE
other	25-29	FALSE	FALSE
iTaukei	30-34	FALSE	FALSE
other	30-34	FALSE	FALSE
iTaukei	30-34	FALSE	FALSE
other	35-39	FALSE	FALSE
other	50-54	FALSE	FALSE
other	50-54	FALSE	FALSE
other	60-64	FALSE	FALSE
other	65-69	FALSE	FALSE
iTaukei	01-04	FALSE	FALSE
iTaukei	01-04	FALSE	FALSE
iTaukei	05-09	FALSE	FALSE
iTaukei	05-09	FALSE	FALSE
iTaukei	10-14	FALSE	FALSE
iTaukei	10-14	FALSE	FALSE
iTaukei	15-19	FALSE	FALSE
iTaukei	15-19	FALSE	FALSE
iTaukei	15-19	FALSE	FALSE
iTaukei	25-29	FALSE	FALSE
iTaukei	20-24	FALSE	FALSE
iTaukei	25-29	FALSE	FALSE
iTaukei	25-29	FALSE	FALSE
iTaukei	30-34	FALSE	FALSE
iTaukei	30-34	FALSE	FALSE
iTaukei	35-39	FALSE	FALSE
iTaukei	55-59	FALSE	FALSE
iTaukei	70+	FALSE	FALSE
iTaukei	65-69	FALSE	FALSE
iTaukei	65-69	FALSE	FALSE
iTaukei	70+	FALSE	FALSE
iTaukei	25-29	FALSE	FALSE
iTaukei	50-54	FALSE	FALSE
iTaukei	50-54	FALSE	FALSE
iTaukei	50-54	FALSE	FALSE
iTaukei	55-59	FALSE	FALSE
iTaukei	70+	FALSE	FALSE
iTaukei	60-64	FALSE	FALSE
iTaukei	60-64	FALSE	FALSE
iTaukei	01-04	FALSE	FALSE
iTaukei	05-09	FALSE	FALSE
iTaukei	05-09	FALSE	FALSE
iTaukei	10-14	FALSE	FALSE
iTaukei	10-14	FALSE	FALSE
iTaukei	15-19	FALSE	FALSE
iTaukei	15-19	FALSE	FALSE
iTaukei	15-19	FALSE	FALSE
iTaukei	20-24	FALSE	FALSE
iTaukei	30-34	FALSE	FALSE
iTaukei	45-49	FALSE	FALSE
iTaukei	45-49	FALSE	FALSE
iTaukei	50-54	FALSE	FALSE
iTaukei	55-59	FALSE	FALSE
iTaukei	70+	FALSE	FALSE
iTaukei	01-04	FALSE	FALSE
iTaukei	15-19	FALSE	FALSE
iTaukei	15-19	FALSE	FALSE
iTaukei	35-39	FALSE	FALSE
iTaukei	40-44	FALSE	FALSE
iTaukei	45-49	FALSE	FALSE
iTaukei	55-59	FALSE	FALSE
iTaukei	55-59	FALSE	FALSE
iTaukei	60-64	FALSE	FALSE
iTaukei	65-69	FALSE	FALSE
iTaukei	70+	FALSE	FALSE
iTaukei	70+	FALSE	FALSE
iTaukei	10-14	FALSE	FALSE
iTaukei	25-29	FALSE	FALSE
other	25-29	FALSE	FALSE
other	30-34	FALSE	FALSE
iTaukei	50-54	FALSE	FALSE
other	45-49	FALSE	FALSE
other	55-59	FALSE	FALSE
iTaukei	10-14	FALSE	FALSE
iTaukei	10-14	FALSE	FALSE
other	15-19	FALSE	FALSE
iTaukei	20-24	FALSE	FALSE
iTaukei	20-24	FALSE	FALSE
iTaukei	25-29	FALSE	FALSE
iTaukei	25-29	FALSE	FALSE
iTaukei	25-29	FALSE	FALSE
other	35-39	FALSE	FALSE
other	35-39	FALSE	FALSE
other	40-44	FALSE	FALSE
iTaukei	45-49	FALSE	FALSE
iTaukei	65-69	FALSE	FALSE
iTaukei	70+	FALSE	FALSE
iTaukei	35-39	FALSE	FALSE
iTaukei	50-54	FALSE	FALSE
other	55-59	FALSE	FALSE
iTaukei	10-14	FALSE	FALSE
other	10-14	FALSE	FALSE
other	15-19	FALSE	FALSE
iTaukei	15-19	FALSE	FALSE
iTaukei	35-39	FALSE	FALSE
iTaukei	50-54	FALSE	FALSE
iTaukei	55-59	FALSE	FALSE
other	10-14	FALSE	FALSE
other	20-24	FALSE	FALSE
iTaukei	25-29	FALSE	FALSE
other	30-34	FALSE	FALSE
other	35-39	FALSE	FALSE
other	35-39	FALSE	FALSE
other	35-39	FALSE	FALSE
other	40-44	FALSE	FALSE
other	45-49	FALSE	FALSE
other	50-54	FALSE	FALSE
other	50-54	FALSE	FALSE
other	60-64	FALSE	FALSE
other	60-64	FALSE	FALSE
other	65-69	FALSE	FALSE
other	65-69	FALSE	FALSE
other	70+	FALSE	FALSE
iTaukei	01-04	FALSE	FALSE
iTaukei	05-09	FALSE	FALSE
iTaukei	05-09	FALSE	FALSE
iTaukei	05-09	FALSE	FALSE
iTaukei	10-14	FALSE	FALSE
iTaukei	10-14	FALSE	FALSE
iTaukei	20-24	FALSE	FALSE
iTaukei	20-24	FALSE	FALSE
iTaukei	20-24	FALSE	FALSE
iTaukei	25-29	FALSE	FALSE
iTaukei	25-29	FALSE	FALSE
iTaukei	35-39	FALSE	FALSE
iTaukei	35-39	FALSE	FALSE
iTaukei	35-39	FALSE	FALSE
iTaukei	40-44	FALSE	FALSE
iTaukei	45-49	FALSE	FALSE
iTaukei	45-49	FALSE	FALSE
iTaukei	50-54	FALSE	FALSE
iTaukei	55-59	FALSE	FALSE
iTaukei	55-59	FALSE	FALSE
iTaukei	70+	FALSE	FALSE
iTaukei	70+	FALSE	FALSE
iTaukei	01-04	FALSE	FALSE
iTaukei	05-09	FALSE	FALSE
iTaukei	05-09	FALSE	FALSE
iTaukei	15-19	FALSE	FALSE
iTaukei	20-24	FALSE	FALSE
iTaukei	20-24	FALSE	FALSE
iTaukei	25-29	FALSE	FALSE
iTaukei	25-29	FALSE	FALSE
iTaukei	30-34	FALSE	FALSE
iTaukei	35-39	FALSE	FALSE
iTaukei	35-39	FALSE	FALSE
iTaukei	35-39	FALSE	FALSE
iTaukei	35-39	FALSE	FALSE
iTaukei	40-44	FALSE	FALSE
iTaukei	50-54	FALSE	FALSE
iTaukei	50-54	FALSE	FALSE
iTaukei	55-59	FALSE	FALSE
iTaukei	65-69	FALSE	FALSE
iTaukei	30-34	FALSE	FALSE
iTaukei	01-04	FALSE	FALSE
iTaukei	05-09	FALSE	FALSE
iTaukei	15-19	FALSE	FALSE
iTaukei	15-19	FALSE	FALSE
iTaukei	20-24	FALSE	FALSE
iTaukei	25-29	FALSE	FALSE
iTaukei	10-14	FALSE	FALSE
iTaukei	45-49	FALSE	FALSE
iTaukei	01-04	FALSE	FALSE
iTaukei	10-14	FALSE	FALSE
iTaukei	10-14	FALSE	FALSE
iTaukei	20-24	FALSE	FALSE
iTaukei	25-29	FALSE	FALSE
iTaukei	25-29	FALSE	FALSE
iTaukei	25-29	FALSE	FALSE
iTaukei	30-34	FALSE	FALSE
iTaukei	55-59	FALSE	FALSE
iTaukei	60-64	FALSE	FALSE
iTaukei	05-09	FALSE	FALSE
iTaukei	25-29	FALSE	FALSE
iTaukei	01-04	FALSE	FALSE
iTaukei	25-29	FALSE	FALSE
other	30-34	FALSE	FALSE
other	45-49	FALSE	FALSE
other	35-39	FALSE	FALSE
iTaukei	10-14	FALSE	FALSE
iTaukei	60-64	FALSE	FALSE
iTaukei	15-19	FALSE	FALSE
iTaukei	70+	FALSE	FALSE
iTaukei	65-69	FALSE	FALSE
iTaukei	20-24	FALSE	FALSE
iTaukei	10-14	FALSE	FALSE
iTaukei	70+	FALSE	FALSE
iTaukei	55-59	FALSE	FALSE
iTaukei	45-49	FALSE	FALSE
iTaukei	30-34	FALSE	FALSE
iTaukei	60-64	FALSE	FALSE
iTaukei	50-54	FALSE	FALSE
iTaukei	15-19	FALSE	FALSE
iTaukei	45-49	FALSE	FALSE
iTaukei	01-04	FALSE	FALSE
iTaukei	10-14	FALSE	FALSE
iTaukei	25-29	FALSE	FALSE
iTaukei	40-44	FALSE	FALSE
iTaukei	45-49	FALSE	FALSE
iTaukei	45-49	FALSE	FALSE
iTaukei	45-49	FALSE	FALSE
iTaukei	50-54	FALSE	FALSE
iTaukei	35-39	FALSE	FALSE
iTaukei	50-54	FALSE	FALSE
iTaukei	55-59	FALSE	FALSE
iTaukei	55-59	FALSE	FALSE
iTaukei	65-69	FALSE	FALSE
iTaukei	10-14	FALSE	FALSE
iTaukei	15-19	FALSE	FALSE
iTaukei	20-24	FALSE	FALSE
iTaukei	25-29	FALSE	FALSE
iTaukei	35-39	FALSE	FALSE
iTaukei	45-49	FALSE	FALSE
iTaukei	45-49	FALSE	FALSE
iTaukei	45-49	FALSE	FALSE
iTaukei	50-54	FALSE	FALSE
iTaukei	55-59	FALSE	FALSE
iTaukei	70+	FALSE	FALSE
iTaukei	60-64	FALSE	FALSE
iTaukei	05-09	FALSE	FALSE
iTaukei	05-09	FALSE	FALSE
iTaukei	05-09	FALSE	FALSE
iTaukei	05-09	FALSE	FALSE
iTaukei	10-14	FALSE	FALSE
iTaukei	10-14	FALSE	FALSE
iTaukei	10-14	FALSE	FALSE
iTaukei	15-19	FALSE	FALSE
iTaukei	15-19	FALSE	FALSE
iTaukei	30-34	FALSE	FALSE
iTaukei	40-44	FALSE	FALSE
iTaukei	40-44	FALSE	FALSE
iTaukei	45-49	FALSE	FALSE
iTaukei	50-54	FALSE	FALSE
iTaukei	50-54	FALSE	FALSE
iTaukei	50-54	FALSE	FALSE
iTaukei	50-54	FALSE	FALSE
iTaukei	55-59	FALSE	FALSE
iTaukei	55-59	FALSE	FALSE
iTaukei	65-69	FALSE	FALSE
iTaukei	65-69	FALSE	FALSE
iTaukei	70+	FALSE	FALSE
iTaukei	05-09	FALSE	FALSE
iTaukei	10-14	FALSE	FALSE
iTaukei	10-14	FALSE	FALSE
iTaukei	10-14	FALSE	FALSE
iTaukei	10-14	FALSE	FALSE
iTaukei	15-19	FALSE	FALSE
iTaukei	15-19	FALSE	FALSE
iTaukei	25-29	FALSE	FALSE
iTaukei	25-29	FALSE	FALSE
iTaukei	25-29	FALSE	FALSE
iTaukei	30-34	FALSE	FALSE
iTaukei	35-39	FALSE	FALSE
iTaukei	45-49	FALSE	FALSE
iTaukei	50-54	FALSE	FALSE
iTaukei	55-59	FALSE	FALSE
iTaukei	70+	FALSE	FALSE
iTaukei	70+	FALSE	FALSE
iTaukei	70+	FALSE	FALSE
iTaukei	05-09	FALSE	FALSE
other	25-29	FALSE	FALSE
iTaukei	25-29	FALSE	FALSE
other	25-29	FALSE	FALSE
other	30-34	FALSE	FALSE
other	45-49	FALSE	FALSE
other	55-59	FALSE	FALSE
iTaukei	25-29	FALSE	FALSE
iTaukei	25-29	FALSE	FALSE
iTaukei	40-44	FALSE	FALSE
iTaukei	45-49	FALSE	FALSE
iTaukei	50-54	FALSE	FALSE
other	65-69	FALSE	FALSE
iTaukei	65-69	FALSE	FALSE
other	01-04	FALSE	FALSE
other	01-04	FALSE	FALSE
iTaukei	10-14	FALSE	FALSE
iTaukei	10-14	FALSE	FALSE
other	15-19	FALSE	FALSE
iTaukei	15-19	FALSE	FALSE
other	20-24	FALSE	FALSE
iTaukei	25-29	FALSE	FALSE
iTaukei	30-34	FALSE	FALSE
other	45-49	FALSE	FALSE
iTaukei	60-64	FALSE	FALSE
iTaukei	20-24	FALSE	FALSE
iTaukei	15-19	FALSE	FALSE
iTaukei	15-19	FALSE	FALSE
iTaukei	25-29	FALSE	FALSE
iTaukei	25-29	FALSE	FALSE
iTaukei	25-29	FALSE	FALSE
iTaukei	30-34	FALSE	FALSE
iTaukei	35-39	FALSE	FALSE
iTaukei	35-39	FALSE	FALSE
iTaukei	40-44	FALSE	FALSE
iTaukei	40-44	FALSE	FALSE
iTaukei	55-59	FALSE	FALSE
iTaukei	60-64	FALSE	FALSE
other	25-29	FALSE	FALSE
other	25-29	FALSE	FALSE
other	25-29	FALSE	FALSE
other	30-34	FALSE	FALSE
other	30-34	FALSE	FALSE
other	35-39	FALSE	FALSE
other	55-59	FALSE	FALSE
other	60-64	FALSE	FALSE
other	60-64	FALSE	FALSE
other	60-64	FALSE	FALSE
other	20-24	FALSE	FALSE
iTaukei	15-19	FALSE	FALSE
other	15-19	FALSE	FALSE
iTaukei	15-19	FALSE	FALSE
other	20-24	FALSE	FALSE
other	20-24	FALSE	FALSE
other	30-34	FALSE	FALSE
other	40-44	FALSE	FALSE
other	45-49	FALSE	FALSE
other	50-54	FALSE	FALSE
other	55-59	FALSE	FALSE
other	55-59	FALSE	FALSE
other	60-64	FALSE	FALSE
other	60-64	FALSE	FALSE
other	65-69	FALSE	FALSE
other	70+	FALSE	FALSE
other	55-59	FALSE	FALSE
iTaukei	01-04	FALSE	FALSE
iTaukei	01-04	FALSE	FALSE
iTaukei	05-09	FALSE	FALSE
iTaukei	10-14	FALSE	FALSE
iTaukei	20-24	FALSE	FALSE
iTaukei	30-34	FALSE	FALSE
other	30-34	FALSE	FALSE
iTaukei	35-39	FALSE	FALSE
iTaukei	40-44	FALSE	FALSE
iTaukei	45-49	FALSE	FALSE
iTaukei	45-49	FALSE	FALSE
iTaukei	50-54	FALSE	FALSE
iTaukei	55-59	FALSE	FALSE
iTaukei	70+	FALSE	FALSE
iTaukei	30-34	FALSE	FALSE
iTaukei	25-29	FALSE	FALSE
iTaukei	20-24	FALSE	FALSE
iTaukei	05-09	FALSE	FALSE
iTaukei	05-09	FALSE	FALSE
iTaukei	10-14	FALSE	FALSE
iTaukei	10-14	FALSE	FALSE
iTaukei	10-14	FALSE	FALSE
iTaukei	10-14	FALSE	FALSE
iTaukei	15-19	FALSE	FALSE
iTaukei	15-19	FALSE	FALSE
iTaukei	20-24	FALSE	FALSE
iTaukei	20-24	FALSE	FALSE
iTaukei	20-24	FALSE	FALSE
iTaukei	35-39	FALSE	FALSE
iTaukei	45-49	FALSE	FALSE
iTaukei	40-44	FALSE	FALSE
iTaukei	50-54	FALSE	FALSE
iTaukei	55-59	FALSE	FALSE
iTaukei	60-64	FALSE	FALSE
iTaukei	60-64	FALSE	FALSE
iTaukei	01-04	FALSE	FALSE
iTaukei	05-09	FALSE	FALSE
iTaukei	05-09	FALSE	FALSE
iTaukei	10-14	FALSE	FALSE
iTaukei	10-14	FALSE	FALSE
iTaukei	10-14	FALSE	FALSE
iTaukei	10-14	FALSE	FALSE
iTaukei	10-14	FALSE	FALSE
iTaukei	10-14	FALSE	FALSE
iTaukei	15-19	FALSE	FALSE
iTaukei	20-24	FALSE	FALSE
iTaukei	20-24	FALSE	FALSE
iTaukei	20-24	FALSE	FALSE
iTaukei	25-29	FALSE	FALSE
iTaukei	40-44	FALSE	FALSE
iTaukei	40-44	FALSE	FALSE
iTaukei	50-54	FALSE	FALSE
iTaukei	55-59	FALSE	FALSE
iTaukei	60-64	FALSE	FALSE
iTaukei	60-64	FALSE	FALSE
iTaukei	60-64	FALSE	FALSE
iTaukei	60-64	FALSE	FALSE
iTaukei	65-69	FALSE	FALSE
iTaukei	70+	FALSE	FALSE
iTaukei	15-19	FALSE	FALSE
other	30-34	FALSE	FALSE
iTaukei	20-24	FALSE	FALSE
iTaukei	25-29	FALSE	FALSE
iTaukei	40-44	FALSE	FALSE
iTaukei	20-24	FALSE	FALSE
iTaukei	35-39	FALSE	FALSE
iTaukei	40-44	FALSE	FALSE
iTaukei	25-29	FALSE	FALSE
iTaukei	55-59	FALSE	FALSE
iTaukei	55-59	FALSE	FALSE
iTaukei	15-19	FALSE	FALSE
iTaukei	25-29	FALSE	FALSE
other	30-34	FALSE	FALSE
iTaukei	30-34	FALSE	FALSE
iTaukei	35-39	FALSE	FALSE
iTaukei	40-44	FALSE	FALSE
iTaukei	45-49	FALSE	FALSE
other	50-54	FALSE	FALSE
iTaukei	50-54	FALSE	FALSE
iTaukei	50-54	FALSE	FALSE
iTaukei	55-59	FALSE	FALSE
iTaukei	55-59	FALSE	FALSE
iTaukei	60-64	FALSE	FALSE
iTaukei	65-69	FALSE	FALSE
iTaukei	30-34	FALSE	FALSE
other	55-59	FALSE	FALSE
other	40-44	FALSE	FALSE
other	50-54	FALSE	FALSE
iTaukei	65-69	FALSE	FALSE
other	45-49	FALSE	FALSE
other	20-24	FALSE	FALSE
other	50-54	FALSE	FALSE
other	40-44	FALSE	FALSE
other	45-49	FALSE	FALSE
other	05-09	FALSE	FALSE
other	15-19	FALSE	FALSE
other	15-19	FALSE	FALSE
other	25-29	FALSE	FALSE
other	25-29	FALSE	FALSE
other	30-34	FALSE	FALSE
other	30-34	FALSE	FALSE
iTaukei	30-34	FALSE	FALSE
other	30-34	FALSE	FALSE
other	30-34	FALSE	FALSE
other	30-34	FALSE	FALSE
other	35-39	FALSE	FALSE
other	40-44	FALSE	FALSE
other	40-44	FALSE	FALSE
other	45-49	FALSE	FALSE
other	50-54	FALSE	FALSE
iTaukei	60-64	FALSE	FALSE
other	70+	FALSE	FALSE
other	55-59	FALSE	FALSE
iTaukei	01-04	FALSE	FALSE
iTaukei	01-04	FALSE	FALSE
iTaukei	01-04	FALSE	FALSE
iTaukei	05-09	FALSE	FALSE
iTaukei	10-14	FALSE	FALSE
iTaukei	10-14	FALSE	FALSE
iTaukei	10-14	FALSE	FALSE
iTaukei	15-19	FALSE	FALSE
iTaukei	15-19	FALSE	FALSE
iTaukei	15-19	FALSE	FALSE
iTaukei	20-24	FALSE	FALSE
other	20-24	FALSE	FALSE
iTaukei	20-24	FALSE	FALSE
iTaukei	30-34	FALSE	FALSE
iTaukei	30-34	FALSE	FALSE
other	30-34	FALSE	FALSE
iTaukei	40-44	FALSE	FALSE
iTaukei	45-49	FALSE	FALSE
iTaukei	70+	FALSE	FALSE
other	05-09	FALSE	FALSE
other	10-14	FALSE	FALSE
other	10-14	FALSE	FALSE
other	10-14	FALSE	FALSE
other	10-14	FALSE	FALSE
other	15-19	FALSE	FALSE
iTaukei	15-19	FALSE	FALSE
other	20-24	FALSE	FALSE
other	25-29	FALSE	FALSE
other	35-39	FALSE	FALSE
iTaukei	35-39	FALSE	FALSE
other	40-44	FALSE	FALSE
other	45-49	FALSE	FALSE
other	50-54	FALSE	FALSE
other	55-59	FALSE	FALSE
other	50-54	FALSE	FALSE
iTaukei	65-69	FALSE	FALSE
other	65-69	FALSE	FALSE
iTaukei	70+	FALSE	FALSE
other	01-04	FALSE	FALSE
iTaukei	05-09	FALSE	FALSE
iTaukei	10-14	FALSE	FALSE
iTaukei	10-14	FALSE	FALSE
other	10-14	FALSE	FALSE
other	10-14	FALSE	FALSE
other	15-19	FALSE	FALSE
iTaukei	20-24	FALSE	FALSE
other	20-24	FALSE	FALSE
other	30-34	FALSE	FALSE
other	45-49	FALSE	FALSE
other	45-49	FALSE	FALSE
other	55-59	FALSE	FALSE
other	60-64	FALSE	FALSE
other	60-64	FALSE	FALSE
other	65-69	FALSE	FALSE
other	65-69	FALSE	FALSE
iTaukei	05-09	FALSE	FALSE
other	65-69	FALSE	FALSE
iTaukei	01-04	FALSE	FALSE
other	01-04	FALSE	FALSE
other	05-09	FALSE	FALSE
iTaukei	05-09	FALSE	FALSE
other	10-14	FALSE	FALSE
iTaukei	10-14	FALSE	FALSE
other	15-19	FALSE	FALSE
iTaukei	20-24	FALSE	FALSE
iTaukei	25-29	FALSE	FALSE
other	20-24	FALSE	FALSE
iTaukei	25-29	FALSE	FALSE
other	30-34	FALSE	FALSE
other	30-34	FALSE	FALSE
other	30-34	FALSE	FALSE
iTaukei	01-04	FALSE	FALSE
iTaukei	01-04	FALSE	FALSE
other	05-09	FALSE	FALSE
other	10-14	FALSE	FALSE
other	10-14	FALSE	FALSE
other	15-19	FALSE	FALSE
other	15-19	FALSE	FALSE
other	15-19	FALSE	FALSE
other	20-24	FALSE	FALSE
other	25-29	FALSE	FALSE
iTaukei	25-29	FALSE	FALSE
other	30-34	FALSE	FALSE
other	35-39	FALSE	FALSE
other	60-64	FALSE	FALSE
other	60-64	FALSE	FALSE
other	01-04	FALSE	FALSE
other	01-04	FALSE	FALSE
iTaukei	01-04	FALSE	FALSE
other	10-14	FALSE	FALSE
other	10-14	FALSE	FALSE
iTaukei	10-14	FALSE	FALSE
iTaukei	15-19	FALSE	FALSE
iTaukei	15-19	FALSE	FALSE
iTaukei	15-19	FALSE	FALSE
other	25-29	FALSE	FALSE
other	35-39	FALSE	FALSE
iTaukei	10-14	FALSE	FALSE
iTaukei	01-04	FALSE	FALSE
iTaukei	05-09	FALSE	FALSE
iTaukei	05-09	FALSE	FALSE
iTaukei	05-09	FALSE	FALSE
iTaukei	10-14	FALSE	FALSE
iTaukei	15-19	FALSE	FALSE
iTaukei	15-19	FALSE	FALSE
iTaukei	15-19	FALSE	FALSE
iTaukei	15-19	FALSE	FALSE
iTaukei	20-24	FALSE	FALSE
iTaukei	25-29	FALSE	FALSE
iTaukei	25-29	FALSE	FALSE
iTaukei	30-34	FALSE	FALSE
iTaukei	30-34	FALSE	FALSE
iTaukei	50-54	FALSE	FALSE
iTaukei	50-54	FALSE	FALSE
iTaukei	70+	FALSE	FALSE
iTaukei	05-09	FALSE	FALSE
iTaukei	05-09	FALSE	FALSE
other	05-09	FALSE	FALSE
other	05-09	FALSE	FALSE
other	05-09	FALSE	FALSE
other	05-09	FALSE	FALSE
other	10-14	FALSE	FALSE
other	10-14	FALSE	FALSE
iTaukei	10-14	FALSE	FALSE
other	15-19	FALSE	FALSE
iTaukei	20-24	FALSE	FALSE
iTaukei	25-29	FALSE	FALSE
other	30-34	FALSE	FALSE
other	40-44	FALSE	FALSE
other	45-49	FALSE	FALSE
iTaukei	01-04	FALSE	FALSE
iTaukei	01-04	FALSE	FALSE
iTaukei	05-09	FALSE	FALSE
iTaukei	05-09	FALSE	FALSE
iTaukei	05-09	FALSE	FALSE
iTaukei	05-09	FALSE	FALSE
iTaukei	10-14	FALSE	FALSE
iTaukei	15-19	FALSE	FALSE
iTaukei	20-24	FALSE	FALSE
iTaukei	20-24	FALSE	FALSE
iTaukei	20-24	FALSE	FALSE
iTaukei	20-24	FALSE	FALSE
iTaukei	25-29	FALSE	FALSE
iTaukei	30-34	FALSE	FALSE
iTaukei	40-44	FALSE	FALSE
iTaukei	45-49	FALSE	FALSE
iTaukei	50-54	FALSE	FALSE
iTaukei	50-54	FALSE	FALSE
iTaukei	50-54	FALSE	FALSE
iTaukei	55-59	FALSE	FALSE
iTaukei	55-59	FALSE	FALSE
iTaukei	55-59	FALSE	FALSE
iTaukei	65-69	FALSE	FALSE
iTaukei	25-29	FALSE	FALSE
iTaukei	05-09	FALSE	FALSE
iTaukei	05-09	FALSE	FALSE
iTaukei	05-09	FALSE	FALSE
iTaukei	10-14	FALSE	FALSE
other	10-14	FALSE	FALSE
iTaukei	15-19	FALSE	FALSE
iTaukei	25-29	FALSE	FALSE
iTaukei	20-24	FALSE	FALSE
iTaukei	20-24	FALSE	FALSE
other	20-24	FALSE	FALSE
iTaukei	20-24	FALSE	FALSE
iTaukei	25-29	FALSE	FALSE
other	25-29	FALSE	FALSE
other	30-34	FALSE	FALSE
other	30-34	FALSE	FALSE
iTaukei	40-44	FALSE	FALSE
iTaukei	40-44	FALSE	FALSE
iTaukei	55-59	FALSE	FALSE
other	65-69	FALSE	FALSE
iTaukei	55-59	FALSE	FALSE
iTaukei	01-04	FALSE	FALSE
iTaukei	01-04	FALSE	FALSE
iTaukei	01-04	FALSE	FALSE
iTaukei	05-09	FALSE	FALSE
iTaukei	10-14	FALSE	FALSE
iTaukei	10-14	FALSE	FALSE
iTaukei	10-14	FALSE	FALSE
iTaukei	15-19	FALSE	FALSE
iTaukei	20-24	FALSE	FALSE
iTaukei	20-24	FALSE	FALSE
iTaukei	20-24	FALSE	FALSE
iTaukei	30-34	FALSE	FALSE
iTaukei	30-34	FALSE	FALSE
iTaukei	25-29	FALSE	FALSE
iTaukei	30-34	FALSE	FALSE
iTaukei	30-34	FALSE	FALSE
iTaukei	35-39	FALSE	FALSE
iTaukei	50-54	FALSE	FALSE
iTaukei	50-54	FALSE	FALSE
iTaukei	60-64	FALSE	FALSE
iTaukei	60-64	FALSE	FALSE
iTaukei	70+	FALSE	FALSE
iTaukei	01-04	FALSE	FALSE
iTaukei	05-09	FALSE	FALSE
iTaukei	05-09	FALSE	FALSE
iTaukei	05-09	FALSE	FALSE
iTaukei	10-14	FALSE	FALSE
iTaukei	10-14	FALSE	FALSE
iTaukei	10-14	FALSE	FALSE
iTaukei	15-19	FALSE	FALSE
iTaukei	20-24	FALSE	FALSE
iTaukei	20-24	FALSE	FALSE
iTaukei	20-24	FALSE	FALSE
iTaukei	25-29	FALSE	FALSE
iTaukei	25-29	FALSE	FALSE
iTaukei	25-29	FALSE	FALSE
iTaukei	25-29	FALSE	FALSE
iTaukei	30-34	FALSE	FALSE
iTaukei	30-34	FALSE	FALSE
iTaukei	40-44	FALSE	FALSE
iTaukei	45-49	FALSE	FALSE
iTaukei	50-54	FALSE	FALSE
iTaukei	55-59	FALSE	FALSE
iTaukei	70+	FALSE	FALSE
iTaukei	01-04	FALSE	FALSE
iTaukei	05-09	FALSE	FALSE
iTaukei	15-19	FALSE	FALSE
iTaukei	20-24	FALSE	FALSE
iTaukei	20-24	FALSE	FALSE
iTaukei	20-24	FALSE	FALSE
iTaukei	25-29	FALSE	FALSE
iTaukei	20-24	FALSE	FALSE
iTaukei	25-29	FALSE	FALSE
iTaukei	25-29	FALSE	FALSE
iTaukei	30-34	FALSE	FALSE
iTaukei	30-34	FALSE	FALSE
iTaukei	35-39	FALSE	FALSE
iTaukei	35-39	FALSE	FALSE
iTaukei	35-39	FALSE	FALSE
iTaukei	35-39	FALSE	FALSE
iTaukei	40-44	FALSE	FALSE
iTaukei	35-39	FALSE	FALSE
iTaukei	40-44	FALSE	FALSE
iTaukei	45-49	FALSE	FALSE
iTaukei	40-44	FALSE	FALSE
iTaukei	65-69	FALSE	FALSE
iTaukei	01-04	FALSE	FALSE
iTaukei	20-24	FALSE	FALSE
iTaukei	05-09	FALSE	FALSE
iTaukei	05-09	FALSE	FALSE
iTaukei	05-09	FALSE	FALSE
iTaukei	05-09	FALSE	FALSE
iTaukei	05-09	FALSE	FALSE
iTaukei	10-14	FALSE	FALSE
iTaukei	15-19	FALSE	FALSE
iTaukei	10-14	FALSE	FALSE
iTaukei	15-19	FALSE	FALSE
iTaukei	15-19	FALSE	FALSE
iTaukei	25-29	FALSE	FALSE
iTaukei	30-34	FALSE	FALSE
iTaukei	35-39	FALSE	FALSE
iTaukei	40-44	FALSE	FALSE
iTaukei	45-49	FALSE	FALSE
iTaukei	45-49	FALSE	FALSE
iTaukei	50-54	FALSE	FALSE
iTaukei	15-19	FALSE	FALSE
iTaukei	01-04	FALSE	FALSE
iTaukei	05-09	FALSE	FALSE
iTaukei	10-14	FALSE	FALSE
iTaukei	10-14	FALSE	FALSE
iTaukei	15-19	FALSE	FALSE
iTaukei	15-19	FALSE	FALSE
iTaukei	20-24	FALSE	FALSE
iTaukei	20-24	FALSE	FALSE
iTaukei	20-24	FALSE	FALSE
iTaukei	25-29	FALSE	FALSE
iTaukei	25-29	FALSE	FALSE
iTaukei	25-29	FALSE	FALSE
iTaukei	30-34	FALSE	FALSE
iTaukei	35-39	FALSE	FALSE
other	35-39	FALSE	FALSE
iTaukei	40-44	FALSE	FALSE
iTaukei	40-44	FALSE	FALSE
iTaukei	45-49	FALSE	FALSE
iTaukei	45-49	FALSE	FALSE
iTaukei	50-54	FALSE	FALSE
iTaukei	65-69	FALSE	FALSE
iTaukei	65-69	FALSE	FALSE
iTaukei	70+	FALSE	FALSE
iTaukei	01-04	FALSE	FALSE
iTaukei	01-04	FALSE	FALSE
iTaukei	01-04	FALSE	FALSE
iTaukei	05-09	FALSE	FALSE
iTaukei	05-09	FALSE	FALSE
iTaukei	10-14	FALSE	FALSE
iTaukei	10-14	FALSE	FALSE
iTaukei	10-14	FALSE	FALSE
iTaukei	15-19	FALSE	FALSE
iTaukei	15-19	FALSE	FALSE
iTaukei	15-19	FALSE	FALSE
iTaukei	20-24	FALSE	FALSE
iTaukei	30-34	FALSE	FALSE
iTaukei	35-39	FALSE	FALSE
iTaukei	35-39	FALSE	FALSE
iTaukei	55-59	FALSE	FALSE
iTaukei	60-64	FALSE	FALSE
iTaukei	15-19	TRUE	FALSE
other	25-29	TRUE	FALSE
iTaukei	30-34	TRUE	FALSE
iTaukei	50-54	TRUE	FALSE
other	65-69	TRUE	FALSE
iTaukei	30-34	TRUE	FALSE
iTaukei	30-34	TRUE	FALSE
iTaukei	40-44	TRUE	FALSE
iTaukei	50-54	TRUE	FALSE
iTaukei	55-59	TRUE	FALSE
iTaukei	30-34	TRUE	FALSE
iTaukei	35-39	TRUE	FALSE
other	45-49	TRUE	FALSE
other	50-54	TRUE	FALSE
other	55-59	TRUE	FALSE
other	35-39	TRUE	FALSE
other	35-39	TRUE	FALSE
iTaukei	25-29	TRUE	FALSE
iTaukei	50-54	TRUE	FALSE
iTaukei	55-59	TRUE	FALSE
other	10-14	TRUE	FALSE
iTaukei	20-24	TRUE	FALSE
iTaukei	35-39	TRUE	FALSE
iTaukei	45-49	TRUE	FALSE
iTaukei	50-54	TRUE	FALSE
iTaukei	65-69	TRUE	FALSE
iTaukei	65-69	TRUE	FALSE
iTaukei	70+	TRUE	FALSE
iTaukei	30-34	TRUE	FALSE
iTaukei	35-39	TRUE	FALSE
iTaukei	45-49	TRUE	FALSE
iTaukei	45-49	TRUE	FALSE
iTaukei	50-54	TRUE	FALSE
iTaukei	55-59	TRUE	FALSE
iTaukei	70+	TRUE	FALSE
iTaukei	70+	TRUE	FALSE
iTaukei	30-34	TRUE	FALSE
iTaukei	35-39	TRUE	FALSE
iTaukei	65-69	TRUE	FALSE
iTaukei	25-29	TRUE	FALSE
other	30-34	TRUE	FALSE
other	55-59	TRUE	FALSE
iTaukei	65-69	TRUE	FALSE
iTaukei	65-69	TRUE	FALSE
iTaukei	25-29	TRUE	FALSE
iTaukei	35-39	TRUE	FALSE
iTaukei	35-39	TRUE	FALSE
iTaukei	35-39	TRUE	FALSE
other	40-44	TRUE	FALSE
other	40-44	TRUE	FALSE
iTaukei	50-54	TRUE	FALSE
iTaukei	55-59	TRUE	FALSE
other	60-64	TRUE	FALSE
iTaukei	25-29	TRUE	FALSE
iTaukei	30-34	TRUE	FALSE
other	45-49	TRUE	FALSE
other	55-59	TRUE	FALSE
iTaukei	65-69	TRUE	FALSE
iTaukei	50-54	TRUE	FALSE
iTaukei	50-54	TRUE	FALSE
iTaukei	50-54	TRUE	FALSE
iTaukei	65-69	TRUE	FALSE
iTaukei	30-34	TRUE	FALSE
iTaukei	15-19	TRUE	FALSE
iTaukei	35-39	TRUE	FALSE
iTaukei	40-44	TRUE	FALSE
iTaukei	45-49	TRUE	FALSE
iTaukei	50-54	TRUE	FALSE
iTaukei	60-64	TRUE	FALSE
iTaukei	70+	TRUE	FALSE
iTaukei	40-44	TRUE	FALSE
iTaukei	50-54	TRUE	FALSE
iTaukei	60-64	TRUE	FALSE
iTaukei	65-69	TRUE	FALSE
iTaukei	25-29	TRUE	FALSE
iTaukei	35-39	TRUE	FALSE
iTaukei	35-39	TRUE	FALSE
iTaukei	40-44	TRUE	FALSE
iTaukei	25-29	TRUE	FALSE
iTaukei	45-49	TRUE	FALSE
iTaukei	55-59	TRUE	FALSE
iTaukei	65-69	TRUE	FALSE
iTaukei	15-19	TRUE	FALSE
iTaukei	20-24	TRUE	FALSE
iTaukei	25-29	TRUE	FALSE
other	35-39	TRUE	FALSE
iTaukei	70+	TRUE	FALSE
other	25-29	TRUE	FALSE
iTaukei	30-34	TRUE	FALSE
other	35-39	TRUE	FALSE
iTaukei	40-44	TRUE	FALSE
iTaukei	50-54	TRUE	FALSE
iTaukei	15-19	TRUE	FALSE
iTaukei	40-44	TRUE	FALSE
iTaukei	55-59	TRUE	FALSE
other	45-49	TRUE	FALSE
iTaukei	25-29	TRUE	FALSE
iTaukei	30-34	TRUE	FALSE
iTaukei	30-34	TRUE	FALSE
iTaukei	35-39	TRUE	FALSE
iTaukei	35-39	TRUE	FALSE
iTaukei	60-64	TRUE	FALSE
iTaukei	20-24	TRUE	FALSE
other	25-29	TRUE	FALSE
other	30-34	TRUE	FALSE
other	30-34	TRUE	FALSE
other	50-54	TRUE	FALSE
iTaukei	55-59	TRUE	FALSE
iTaukei	70+	TRUE	FALSE
iTaukei	05-09	TRUE	FALSE
iTaukei	20-24	TRUE	FALSE
iTaukei	30-34	TRUE	FALSE
other	55-59	TRUE	FALSE
iTaukei	40-44	TRUE	FALSE
iTaukei	40-44	TRUE	FALSE
other	30-34	TRUE	FALSE
iTaukei	35-39	TRUE	FALSE
other	40-44	TRUE	FALSE
other	55-59	TRUE	FALSE
other	70+	TRUE	FALSE
other	45-49	TRUE	FALSE
other	45-49	TRUE	FALSE
iTaukei	40-44	TRUE	FALSE
iTaukei	40-44	TRUE	FALSE
iTaukei	35-39	TRUE	FALSE
iTaukei	45-49	TRUE	FALSE
other	45-49	TRUE	FALSE
iTaukei	45-49	TRUE	FALSE
iTaukei	45-49	TRUE	FALSE
iTaukei	65-69	TRUE	FALSE
iTaukei	30-34	TRUE	FALSE
iTaukei	35-39	TRUE	FALSE
iTaukei	35-39	TRUE	FALSE
iTaukei	35-39	TRUE	FALSE
iTaukei	40-44	TRUE	FALSE
iTaukei	40-44	TRUE	FALSE
iTaukei	45-49	TRUE	FALSE
iTaukei	50-54	TRUE	FALSE
iTaukei	50-54	TRUE	FALSE
iTaukei	55-59	TRUE	FALSE
iTaukei	55-59	TRUE	FALSE
iTaukei	25-29	TRUE	FALSE
iTaukei	30-34	TRUE	FALSE
iTaukei	40-44	TRUE	FALSE
iTaukei	40-44	TRUE	FALSE
iTaukei	40-44	TRUE	FALSE
iTaukei	45-49	TRUE	FALSE
iTaukei	50-54	TRUE	FALSE
iTaukei	55-59	TRUE	FALSE
iTaukei	65-69	TRUE	FALSE
iTaukei	65-69	TRUE	FALSE
iTaukei	70+	TRUE	FALSE
iTaukei	20-24	TRUE	FALSE
iTaukei	25-29	TRUE	FALSE
iTaukei	30-34	TRUE	FALSE
iTaukei	30-34	TRUE	FALSE
iTaukei	30-34	TRUE	FALSE
iTaukei	35-39	TRUE	FALSE
iTaukei	45-49	TRUE	FALSE
iTaukei	40-44	TRUE	FALSE
iTaukei	40-44	TRUE	FALSE
iTaukei	50-54	TRUE	FALSE
iTaukei	55-59	TRUE	FALSE
iTaukei	65-69	TRUE	FALSE
other	65-69	TRUE	FALSE
iTaukei	35-39	TRUE	FALSE
iTaukei	60-64	TRUE	FALSE
iTaukei	60-64	TRUE	FALSE
iTaukei	10-14	TRUE	FALSE
iTaukei	40-44	TRUE	FALSE
iTaukei	50-54	TRUE	FALSE
iTaukei	45-49	TRUE	FALSE
iTaukei	60-64	TRUE	FALSE
iTaukei	15-19	TRUE	FALSE
other	30-34	TRUE	FALSE
other	35-39	TRUE	FALSE
other	45-49	TRUE	FALSE
iTaukei	55-59	TRUE	FALSE
iTaukei	35-39	TRUE	FALSE
iTaukei	35-39	TRUE	FALSE
other	45-49	TRUE	FALSE
other	45-49	TRUE	FALSE
iTaukei	60-64	TRUE	FALSE
iTaukei	55-59	TRUE	FALSE
iTaukei	15-19	TRUE	FALSE
iTaukei	15-19	TRUE	FALSE
iTaukei	25-29	TRUE	FALSE
iTaukei	40-44	TRUE	FALSE
iTaukei	40-44	TRUE	FALSE
iTaukei	40-44	TRUE	FALSE
other	45-49	TRUE	FALSE
iTaukei	45-49	TRUE	FALSE
iTaukei	60-64	TRUE	FALSE
other	35-39	TRUE	FALSE
other	45-49	TRUE	FALSE
other	50-54	TRUE	FALSE
other	50-54	TRUE	FALSE
other	55-59	TRUE	FALSE
other	60-64	TRUE	FALSE
other	65-69	TRUE	FALSE
other	70+	TRUE	FALSE
iTaukei	15-19	TRUE	FALSE
iTaukei	15-19	TRUE	FALSE
iTaukei	25-29	TRUE	FALSE
iTaukei	30-34	TRUE	FALSE
iTaukei	30-34	TRUE	FALSE
iTaukei	20-24	TRUE	FALSE
iTaukei	25-29	TRUE	FALSE
iTaukei	45-49	TRUE	FALSE
iTaukei	35-39	TRUE	FALSE
other	50-54	TRUE	FALSE
other	25-29	TRUE	FALSE
other	45-49	TRUE	FALSE
iTaukei	45-49	TRUE	FALSE
iTaukei	60-64	TRUE	FALSE
iTaukei	50-54	TRUE	FALSE
other	30-34	TRUE	FALSE
other	35-39	TRUE	FALSE
iTaukei	50-54	TRUE	FALSE
iTaukei	35-39	TRUE	FALSE
iTaukei	60-64	TRUE	FALSE
iTaukei	55-59	TRUE	FALSE
iTaukei	70+	TRUE	FALSE
iTaukei	30-34	TRUE	FALSE
iTaukei	40-44	TRUE	FALSE
other	25-29	TRUE	FALSE
other	50-54	TRUE	FALSE
iTaukei	30-34	TRUE	FALSE
other	40-44	TRUE	FALSE
other	40-44	TRUE	FALSE
iTaukei	10-14	TRUE	FALSE
iTaukei	40-44	TRUE	FALSE
iTaukei	50-54	TRUE	FALSE
iTaukei	40-44	TRUE	FALSE
iTaukei	60-64	TRUE	FALSE
iTaukei	50-54	TRUE	FALSE
iTaukei	30-34	TRUE	FALSE
iTaukei	30-34	TRUE	FALSE
iTaukei	35-39	TRUE	FALSE
iTaukei	45-49	TRUE	FALSE
iTaukei	50-54	TRUE	FALSE
iTaukei	55-59	TRUE	FALSE
iTaukei	55-59	TRUE	FALSE
iTaukei	70+	TRUE	FALSE
iTaukei	70+	TRUE	FALSE
iTaukei	40-44	TRUE	FALSE
iTaukei	45-49	TRUE	FALSE
iTaukei	50-54	TRUE	FALSE
iTaukei	60-64	TRUE	FALSE
iTaukei	65-69	TRUE	FALSE
iTaukei	25-29	TRUE	FALSE
iTaukei	30-34	TRUE	FALSE
iTaukei	30-34	TRUE	FALSE
iTaukei	55-59	TRUE	FALSE
iTaukei	15-19	TRUE	FALSE
iTaukei	25-29	TRUE	FALSE
iTaukei	30-34	TRUE	FALSE
iTaukei	30-34	TRUE	FALSE
iTaukei	50-54	TRUE	FALSE
other	25-29	TRUE	FALSE
iTaukei	30-34	TRUE	FALSE
other	35-39	TRUE	FALSE
other	35-39	TRUE	FALSE
other	40-44	TRUE	FALSE
other	50-54	TRUE	FALSE
other	50-54	TRUE	FALSE
other	50-54	TRUE	FALSE
other	55-59	TRUE	FALSE
iTaukei	20-24	TRUE	FALSE
iTaukei	25-29	TRUE	FALSE
iTaukei	35-39	TRUE	FALSE
iTaukei	35-39	TRUE	FALSE
iTaukei	40-44	TRUE	FALSE
iTaukei	45-49	TRUE	FALSE
iTaukei	45-49	TRUE	FALSE
iTaukei	55-59	TRUE	FALSE
iTaukei	55-59	TRUE	FALSE
iTaukei	70+	TRUE	FALSE
iTaukei	70+	TRUE	FALSE
iTaukei	30-34	TRUE	FALSE
other	30-34	TRUE	FALSE
other	35-39	TRUE	FALSE
iTaukei	50-54	TRUE	FALSE
iTaukei	30-34	TRUE	FALSE
iTaukei	35-39	TRUE	FALSE
iTaukei	35-39	TRUE	FALSE
iTaukei	35-39	TRUE	FALSE
iTaukei	40-44	TRUE	FALSE
iTaukei	50-54	TRUE	FALSE
other	20-24	TRUE	FALSE
other	25-29	TRUE	FALSE
other	25-29	TRUE	FALSE
other	45-49	TRUE	FALSE
other	45-49	TRUE	FALSE
other	50-54	TRUE	FALSE
other	50-54	TRUE	FALSE
other	55-59	TRUE	FALSE
other	60-64	TRUE	FALSE
other	70+	TRUE	FALSE
other	70+	TRUE	FALSE
other	10-14	TRUE	FALSE
other	25-29	TRUE	FALSE
iTaukei	50-54	TRUE	FALSE
iTaukei	30-34	TRUE	FALSE
iTaukei	35-39	TRUE	FALSE
iTaukei	45-49	TRUE	FALSE
iTaukei	45-49	TRUE	FALSE
iTaukei	55-59	TRUE	FALSE
iTaukei	65-69	TRUE	FALSE
iTaukei	70+	TRUE	FALSE
iTaukei	35-39	TRUE	FALSE
iTaukei	55-59	TRUE	FALSE
iTaukei	40-44	TRUE	FALSE
iTaukei	45-49	TRUE	FALSE
iTaukei	45-49	TRUE	FALSE
iTaukei	50-54	TRUE	FALSE
iTaukei	50-54	TRUE	FALSE
iTaukei	50-54	TRUE	FALSE
iTaukei	50-54	TRUE	FALSE
iTaukei	50-54	TRUE	FALSE
other	45-49	TRUE	FALSE
iTaukei	50-54	TRUE	FALSE
iTaukei	40-44	TRUE	FALSE
iTaukei	60-64	TRUE	FALSE
iTaukei	55-59	TRUE	FALSE
iTaukei	70+	TRUE	FALSE
other	45-49	TRUE	FALSE
iTaukei	55-59	TRUE	FALSE
iTaukei	35-39	TRUE	FALSE
other	50-54	TRUE	FALSE
other	30-34	TRUE	FALSE
other	40-44	TRUE	FALSE
other	65-69	TRUE	FALSE
other	25-29	TRUE	FALSE
other	35-39	TRUE	FALSE
other	65-69	TRUE	FALSE
other	45-49	TRUE	FALSE
other	50-54	TRUE	FALSE
other	60-64	TRUE	FALSE
other	30-34	TRUE	FALSE
iTaukei	55-59	TRUE	FALSE
other	65-69	TRUE	FALSE
other	65-69	TRUE	FALSE
other	25-29	TRUE	FALSE
other	30-34	TRUE	FALSE
other	30-34	TRUE	FALSE
iTaukei	30-34	TRUE	FALSE
iTaukei	30-34	TRUE	FALSE
other	25-29	TRUE	FALSE
other	35-39	TRUE	FALSE
other	35-39	TRUE	FALSE
other	45-49	TRUE	FALSE
other	40-44	TRUE	FALSE
iTaukei	50-54	TRUE	FALSE
other	70+	TRUE	FALSE
other	35-39	TRUE	FALSE
iTaukei	35-39	TRUE	FALSE
iTaukei	40-44	TRUE	FALSE
iTaukei	45-49	TRUE	FALSE
other	55-59	TRUE	FALSE
other	60-64	TRUE	FALSE
other	70+	TRUE	FALSE
iTaukei	20-24	TRUE	FALSE
iTaukei	30-34	TRUE	FALSE
iTaukei	55-59	TRUE	FALSE
iTaukei	60-64	TRUE	FALSE
other	05-09	TRUE	FALSE
other	15-19	TRUE	FALSE
iTaukei	15-19	TRUE	FALSE
other	35-39	TRUE	FALSE
other	35-39	TRUE	FALSE
other	50-54	TRUE	FALSE
other	50-54	TRUE	FALSE
other	55-59	TRUE	FALSE
other	55-59	TRUE	FALSE
iTaukei	50-54	TRUE	FALSE
other	35-39	TRUE	FALSE
other	40-44	TRUE	FALSE
other	40-44	TRUE	FALSE
other	55-59	TRUE	FALSE
iTaukei	45-49	TRUE	FALSE
iTaukei	20-24	TRUE	FALSE
iTaukei	45-49	TRUE	FALSE
iTaukei	60-64	TRUE	FALSE
iTaukei	65-69	TRUE	FALSE
iTaukei	30-34	TRUE	FALSE
iTaukei	60-64	TRUE	FALSE
iTaukei	40-44	TRUE	FALSE
iTaukei	50-54	TRUE	FALSE
iTaukei	65-69	TRUE	FALSE
iTaukei	20-24	TRUE	TRUE
iTaukei	30-34	TRUE	TRUE
iTaukei	55-59	TRUE	TRUE
other	70+	TRUE	TRUE
other	10-14	TRUE	TRUE
iTaukei	15-19	TRUE	TRUE
iTaukei	15-19	TRUE	TRUE
iTaukei	70+	TRUE	TRUE
iTaukei	01-04	TRUE	TRUE
iTaukei	40-44	TRUE	TRUE
iTaukei	15-19	TRUE	TRUE
other	15-19	TRUE	TRUE
iTaukei	20-24	TRUE	TRUE
other	55-59	TRUE	TRUE
other	05-09	TRUE	TRUE
iTaukei	10-14	TRUE	TRUE
other	15-19	TRUE	TRUE
iTaukei	15-19	TRUE	TRUE
iTaukei	15-19	TRUE	TRUE
iTaukei	20-24	TRUE	TRUE
iTaukei	20-24	TRUE	TRUE
iTaukei	25-29	TRUE	TRUE
iTaukei	30-34	TRUE	TRUE
iTaukei	45-49	TRUE	TRUE
iTaukei	45-49	TRUE	TRUE
iTaukei	55-59	TRUE	TRUE
iTaukei	65-69	TRUE	TRUE
iTaukei	50-54	TRUE	TRUE
iTaukei	25-29	TRUE	TRUE
iTaukei	01-04	TRUE	TRUE
iTaukei	10-14	TRUE	TRUE
iTaukei	25-29	TRUE	TRUE
iTaukei	30-34	TRUE	TRUE
iTaukei	05-09	TRUE	TRUE
iTaukei	10-14	TRUE	TRUE
iTaukei	15-19	TRUE	TRUE
iTaukei	25-29	TRUE	TRUE
iTaukei	25-29	TRUE	TRUE
iTaukei	45-49	TRUE	TRUE
iTaukei	20-24	TRUE	TRUE
iTaukei	25-29	TRUE	TRUE
iTaukei	30-34	TRUE	TRUE
iTaukei	30-34	TRUE	TRUE
iTaukei	35-39	TRUE	TRUE
iTaukei	45-49	TRUE	TRUE
iTaukei	10-14	TRUE	TRUE
other	65-69	TRUE	TRUE
iTaukei	10-14	TRUE	TRUE
other	20-24	TRUE	TRUE
other	30-34	TRUE	TRUE
other	35-39	TRUE	TRUE
iTaukei	60-64	TRUE	TRUE
iTaukei	10-14	TRUE	TRUE
iTaukei	20-24	TRUE	TRUE
iTaukei	25-29	TRUE	TRUE
iTaukei	25-29	TRUE	TRUE
iTaukei	40-44	TRUE	TRUE
iTaukei	20-24	TRUE	TRUE
iTaukei	20-24	TRUE	TRUE
iTaukei	30-34	TRUE	TRUE
iTaukei	45-49	TRUE	TRUE
iTaukei	70+	TRUE	TRUE
iTaukei	20-24	TRUE	TRUE
iTaukei	30-34	TRUE	TRUE
iTaukei	20-24	TRUE	TRUE
iTaukei	01-04	TRUE	TRUE
iTaukei	20-24	TRUE	TRUE
iTaukei	40-44	TRUE	TRUE
iTaukei	25-29	TRUE	TRUE
iTaukei	25-29	TRUE	TRUE
iTaukei	30-34	TRUE	TRUE
iTaukei	25-29	TRUE	TRUE
iTaukei	25-29	TRUE	TRUE
iTaukei	30-34	TRUE	TRUE
iTaukei	35-39	TRUE	TRUE
iTaukei	65-69	TRUE	TRUE
iTaukei	35-39	TRUE	TRUE
iTaukei	25-29	TRUE	TRUE
iTaukei	30-34	TRUE	TRUE
iTaukei	55-59	TRUE	TRUE
iTaukei	20-24	TRUE	TRUE
iTaukei	25-29	TRUE	TRUE
iTaukei	35-39	TRUE	TRUE
iTaukei	01-04	TRUE	TRUE
iTaukei	05-09	TRUE	TRUE
iTaukei	10-14	TRUE	TRUE
other	15-19	TRUE	TRUE
other	15-19	TRUE	TRUE
other	20-24	TRUE	TRUE
other	30-34	TRUE	TRUE
iTaukei	35-39	TRUE	TRUE
iTaukei	50-54	TRUE	TRUE
other	55-59	TRUE	TRUE
iTaukei	05-09	TRUE	TRUE
iTaukei	05-09	TRUE	TRUE
iTaukei	10-14	TRUE	TRUE
iTaukei	10-14	TRUE	TRUE
iTaukei	10-14	TRUE	TRUE
iTaukei	15-19	TRUE	TRUE
iTaukei	15-19	TRUE	TRUE
iTaukei	35-39	TRUE	TRUE
iTaukei	50-54	TRUE	TRUE
iTaukei	65-69	TRUE	TRUE
iTaukei	25-29	TRUE	TRUE
iTaukei	30-34	TRUE	TRUE
iTaukei	20-24	TRUE	TRUE
iTaukei	35-39	TRUE	TRUE
iTaukei	45-49	TRUE	TRUE
iTaukei	01-04	TRUE	TRUE
other	10-14	TRUE	TRUE
other	10-14	TRUE	TRUE
other	20-24	TRUE	TRUE
iTaukei	20-24	TRUE	TRUE
iTaukei	45-49	TRUE	TRUE
other	45-49	TRUE	TRUE
iTaukei	70+	TRUE	TRUE
iTaukei	70+	TRUE	TRUE
iTaukei	40-44	TRUE	TRUE
iTaukei	15-19	TRUE	TRUE
iTaukei	15-19	TRUE	TRUE
iTaukei	20-24	TRUE	TRUE
iTaukei	20-24	TRUE	TRUE
iTaukei	25-29	TRUE	TRUE
iTaukei	25-29	TRUE	TRUE
iTaukei	55-59	TRUE	TRUE
other	55-59	TRUE	TRUE
iTaukei	05-09	TRUE	TRUE
iTaukei	25-29	TRUE	TRUE
other	40-44	TRUE	TRUE
iTaukei	60-64	TRUE	TRUE
iTaukei	20-24	TRUE	TRUE
iTaukei	25-29	TRUE	TRUE
iTaukei	30-34	TRUE	TRUE
iTaukei	30-34	TRUE	TRUE
other	05-09	TRUE	TRUE
iTaukei	20-24	TRUE	TRUE
iTaukei	50-54	TRUE	TRUE
iTaukei	25-29	TRUE	TRUE
iTaukei	25-29	TRUE	TRUE
iTaukei	30-34	TRUE	TRUE
iTaukei	45-49	TRUE	TRUE
iTaukei	05-09	TRUE	TRUE
iTaukei	15-19	TRUE	TRUE
iTaukei	30-34	TRUE	TRUE
iTaukei	35-39	TRUE	TRUE
other	35-39	TRUE	TRUE
iTaukei	35-39	TRUE	TRUE
other	40-44	TRUE	TRUE
iTaukei	40-44	TRUE	TRUE
iTaukei	45-49	TRUE	TRUE
other	45-49	TRUE	TRUE
iTaukei	25-29	TRUE	TRUE
iTaukei	30-34	TRUE	TRUE
iTaukei	15-19	TRUE	TRUE
other	15-19	TRUE	TRUE
iTaukei	20-24	TRUE	TRUE
other	40-44	TRUE	TRUE
iTaukei	40-44	TRUE	TRUE
other	50-54	TRUE	TRUE
iTaukei	55-59	TRUE	TRUE
iTaukei	70+	TRUE	TRUE
other	05-09	TRUE	TRUE
other	50-54	TRUE	TRUE
iTaukei	20-24	TRUE	TRUE
iTaukei	01-04	TRUE	TRUE
iTaukei	10-14	TRUE	TRUE
iTaukei	01-04	TRUE	TRUE
iTaukei	25-29	TRUE	TRUE
iTaukei	10-14	TRUE	TRUE
other	10-14	TRUE	TRUE
iTaukei	20-24	TRUE	TRUE
iTaukei	25-29	TRUE	TRUE
iTaukei	45-49	TRUE	TRUE
iTaukei	10-14	TRUE	TRUE
iTaukei	15-19	TRUE	TRUE
iTaukei	30-34	TRUE	TRUE
iTaukei	35-39	TRUE	TRUE
iTaukei	50-54	TRUE	TRUE
iTaukei	35-39	TRUE	TRUE
iTaukei	20-24	TRUE	TRUE
iTaukei	35-39	TRUE	TRUE
iTaukei	30-34	TRUE	TRUE
other	05-09	TRUE	TRUE
iTaukei	25-29	TRUE	TRUE
iTaukei	30-34	TRUE	TRUE
iTaukei	35-39	TRUE	TRUE
iTaukei	20-24	TRUE	TRUE
iTaukei	20-24	TRUE	TRUE
iTaukei	25-29	TRUE	TRUE
iTaukei	40-44	TRUE	TRUE
iTaukei	60-64	TRUE	TRUE
iTaukei	01-04	TRUE	TRUE
iTaukei	25-29	TRUE	TRUE
iTaukei	10-14	TRUE	TRUE
iTaukei	15-19	TRUE	TRUE
iTaukei	20-24	TRUE	TRUE
other	20-24	TRUE	TRUE
iTaukei	20-24	TRUE	TRUE
other	30-34	TRUE	TRUE
iTaukei	40-44	TRUE	TRUE
iTaukei	45-49	TRUE	TRUE
iTaukei	05-09	TRUE	TRUE
iTaukei	20-24	TRUE	TRUE
iTaukei	20-24	TRUE	TRUE
iTaukei	20-24	TRUE	TRUE
iTaukei	20-24	TRUE	TRUE
iTaukei	25-29	TRUE	TRUE
iTaukei	45-49	TRUE	TRUE
iTaukei	65-69	TRUE	TRUE
iTaukei	15-19	TRUE	TRUE
iTaukei	20-24	TRUE	TRUE
iTaukei	20-24	TRUE	TRUE
iTaukei	25-29	TRUE	TRUE
other	01-04	TRUE	TRUE
other	10-14	TRUE	TRUE
iTaukei	25-29	TRUE	TRUE
iTaukei	45-49	TRUE	TRUE
iTaukei	20-24	TRUE	TRUE
iTaukei	25-29	TRUE	TRUE
iTaukei	30-34	TRUE	TRUE
iTaukei	25-29	TRUE	TRUE
iTaukei	25-29	TRUE	TRUE
iTaukei	25-29	TRUE	TRUE
iTaukei	35-39	TRUE	TRUE
iTaukei	35-39	TRUE	TRUE
iTaukei	30-34	TRUE	TRUE
iTaukei	15-19	TRUE	TRUE
iTaukei	25-29	TRUE	TRUE
iTaukei	50-54	TRUE	TRUE
iTaukei	35-39	TRUE	TRUE
other	45-49	TRUE	TRUE
other	20-24	TRUE	TRUE
other	20-24	TRUE	TRUE
other	45-49	TRUE	TRUE
other	15-19	TRUE	TRUE
iTaukei	20-24	TRUE	TRUE
iTaukei	55-59	TRUE	TRUE
other	10-14	TRUE	TRUE
other	20-24	TRUE	TRUE
other	30-34	TRUE	TRUE
other	30-34	TRUE	TRUE
other	45-49	TRUE	TRUE
iTaukei	20-24	TRUE	TRUE
other	35-39	TRUE	TRUE
other	15-19	TRUE	TRUE
other	20-24	TRUE	TRUE
iTaukei	25-29	TRUE	TRUE
iTaukei	30-34	TRUE	TRUE
iTaukei	30-34	TRUE	TRUE
iTaukei	20-24	TRUE	TRUE
other	35-39	TRUE	TRUE
other	05-09	TRUE	TRUE
other	20-24	TRUE	TRUE
other	20-24	TRUE	TRUE
other	25-29	TRUE	TRUE
iTaukei	35-39	TRUE	TRUE
other	50-54	TRUE	TRUE
other	55-59	TRUE	TRUE
iTaukei	40-44	TRUE	TRUE
iTaukei	40-44	TRUE	TRUE
other	05-09	TRUE	TRUE
other	20-24	TRUE	TRUE
other	65-69	TRUE	TRUE
iTaukei	20-24	TRUE	TRUE
other	30-34	TRUE	TRUE
iTaukei	45-49	TRUE	TRUE
iTaukei	10-14	TRUE	TRUE
other	25-29	TRUE	TRUE
iTaukei	10-14	TRUE	TRUE
iTaukei	20-24	TRUE	TRUE
iTaukei	20-24	TRUE	TRUE
iTaukei	30-34	TRUE	TRUE
iTaukei	40-44	TRUE	TRUE
iTaukei	20-24	TRUE	TRUE
iTaukei	35-39	TRUE	TRUE
iTaukei	20-24	TRUE	TRUE
iTaukei	20-24	TRUE	TRUE
iTaukei	25-29	TRUE	TRUE
iTaukei	35-39	TRUE	TRUE
iTaukei	40-44	TRUE	TRUE
iTaukei	30-34	NA	NA
iTaukei	30-34	NA	NA
iTaukei	70+	NA	NA
iTaukei	20-24	NA	NA
iTaukei	40-44	NA	NA
iTaukei	30-34	NA	NA
